# Supplementary material for: Assigning the absolute configuration of single aliphatic molecules by visual inspection
Source: PubMed Central journal article supplement (PMC6010418; doi:10.1038/s41467-018-04843-z), 2018-06-20
Supplement: 41467_2018_4843_MOESM3_ESM.pdf [file 41467_2018_4843_MOESM3_ESM.pdf]

## Supplementary Data 1

### Assigning the absolute configuration of single aliphatic molecules by visual inspection

*Daniel Ebeling,<sup>1,‡,\*</sup> Marina Šekutor,<sup>2,‡,\*</sup> Marvin Stiefermann,<sup>1</sup> Jalmar Tschakert,<sup>1</sup> Jeremy E. P. Dahl,<sup>3</sup> Robert M. K. Carlson,<sup>3</sup> André Schirmeisen,<sup>1,\*</sup> and Peter R. Schreiner<sup>2,\*</sup>*

<sup>1</sup>Institute of Applied Physics, Justus-Liebig University, Heinrich-Buff-Ring 16, 35392 Giessen, Germany, [Daniel.Ebeling@ap.physik.uni-giessen.de](mailto:Daniel.Ebeling@ap.physik.uni-giessen.de), [Andre.Schirmeisen@ap.physik.uni-giessen.de](mailto:Andre.Schirmeisen@ap.physik.uni-giessen.de)

<sup>2</sup>Institute of Organic Chemistry, Justus-Liebig University, Heinrich-Buff-Ring 17, 35392 Giessen, Germany, [Marina.Sekutor@org.Chemie.uni-giessen.de](mailto:Marina.Sekutor@org.Chemie.uni-giessen.de), [prs@uni-giessen.de](mailto:prs@uni-giessen.de)

<sup>3</sup>Stanford Institute for Materials and Energy Sciences, Stanford, CA 94305, USA

<sup>‡</sup>Both contributors are considered first authors.

**Supplementary Data Set 1.** Geometries in Cartesian coordinates in Å computed at the B3LYP-D3(BJ)/6-31G(d,p) level of theory.

---

**1**

---

|   |              |              |              |
|---|--------------|--------------|--------------|
| 1 | -1.473315000 | 1.988168000  | -0.812104000 |
| 6 | 0.629903000  | -0.464365000 | 0.473525000  |
| 6 | -0.629903000 | 0.464365000  | 0.473525000  |
| 6 | -0.600037000 | 1.419624000  | 1.685733000  |
| 1 | -0.661439000 | 0.867209000  | 2.626883000  |
| 1 | -1.488062000 | 2.065082000  | 1.646720000  |
| 6 | 0.674523000  | 2.281164000  | 1.679628000  |
| 1 | 0.681296000  | 2.928291000  | 2.565243000  |
| 6 | 0.696793000  | 3.139154000  | 0.407047000  |
| 1 | 1.592371000  | 3.773413000  | 0.390505000  |
| 1 | -0.173265000 | 3.807880000  | 0.385598000  |
| 6 | 0.680442000  | 2.216435000  | -0.816362000 |
| 1 | 0.688234000  | 2.819479000  | -1.734774000 |
| 6 | -0.586718000 | 1.336601000  | -0.815806000 |
| 6 | -0.627619000 | 0.448594000  | -2.070741000 |
| 1 | -0.611600000 | 1.090955000  | -2.961800000 |
| 6 | -1.901945000 | -0.401404000 | -2.065185000 |
| 1 | -2.785901000 | 0.249301000  | -2.076704000 |
| 1 | -1.948331000 | -1.023477000 | -2.968370000 |
| 6 | -1.916408000 | -1.289430000 | -0.816930000 |
| 1 | -2.825450000 | -1.905960000 | -0.812949000 |
| 6 | -1.892782000 | -0.435316000 | 0.472811000  |
| 1 | -2.780914000 | 0.212570000  | 0.488606000  |
| 6 | -1.916408000 | -1.371241000 | 1.694938000  |
| 1 | -2.825706000 | -1.984854000 | 1.663929000  |
| 1 | -1.959382000 | -0.799004000 | 2.627270000  |
| 6 | -0.674523000 | -2.281164000 | 1.679628000  |
| 1 | -0.681296000 | -2.928291000 | 2.565243000  |
| 6 | -0.696793000 | -3.139154000 | 0.407047000  |
| 1 | 0.173265000  | -3.807880000 | 0.385598000  |
| 1 | -1.592371000 | -3.773413000 | 0.390505000  |
| 6 | -0.680442000 | -2.216435000 | -0.816362000 |
| 1 | -0.688234000 | -2.819479000 | -1.734774000 |
| 6 | 0.586718000  | -1.336601000 | -0.815806000 |
| 1 | 1.473315000  | -1.988168000 | -0.812104000 |
| 6 | 0.627619000  | -0.448594000 | -2.070741000 |
| 1 | 0.611600000  | -1.090955000 | -2.961800000 |
| 6 | 1.901945000  | 0.401404000  | -2.065185000 |
| 1 | 2.785901000  | -0.249301000 | -2.076704000 |
| 1 | 1.948331000  | 1.023477000  | -2.968370000 |
| 6 | 1.916408000  | 1.289430000  | -0.816930000 |
| 1 | 2.825450000  | 1.905960000  | -0.812949000 |
| 6 | 1.892782000  | 0.435316000  | 0.472811000  |
| 1 | 2.780914000  | -0.212570000 | 0.488606000  |
| 6 | 1.916408000  | 1.371241000  | 1.694938000  |
| 1 | 2.825706000  | 1.984854000  | 1.663929000  |

|   |             |              |             |
|---|-------------|--------------|-------------|
| 1 | 1.959382000 | 0.799004000  | 2.627270000 |
| 6 | 0.600037000 | -1.419624000 | 1.685733000 |
| 1 | 1.488062000 | -2.065082000 | 1.646720000 |
| 1 | 0.661439000 | -0.867209000 | 2.626883000 |

---

**2**

---

|   |              |              |              |
|---|--------------|--------------|--------------|
| 6 | -0.078968000 | -0.473428000 | 0.778513000  |
| 6 | -0.916278000 | -1.685513000 | 1.239372000  |
| 1 | -0.409684000 | -2.626745000 | 1.011107000  |
| 1 | -1.019665000 | -1.646266000 | 2.332290000  |
| 6 | -2.306746000 | -1.679646000 | 0.581125000  |
| 1 | -2.867045000 | -2.565312000 | 0.904830000  |
| 6 | -3.056734000 | -0.407053000 | 0.998709000  |
| 1 | -3.189091000 | -0.385412000 | 2.088042000  |
| 1 | -4.058640000 | -0.390676000 | 0.550928000  |
| 6 | -2.254289000 | 0.816365000  | 0.542685000  |
| 1 | -2.777186000 | 1.734853000  | 0.842943000  |
| 6 | -0.851855000 | 0.815855000  | 1.185363000  |
| 1 | -0.961176000 | 0.812185000  | 2.280172000  |
| 6 | -0.066570000 | 2.070695000  | 0.768541000  |
| 1 | -0.627452000 | 2.961825000  | 1.081883000  |
| 6 | 0.066569000  | 2.070695000  | -0.768541000 |
| 1 | 0.627451000  | 2.961826000  | -1.081882000 |
| 6 | -1.313821000 | 2.065039000  | -1.432659000 |
| 1 | -1.872855000 | 2.968289000  | -1.156090000 |
| 1 | -1.203680000 | 2.076420000  | -2.524751000 |
| 6 | -2.085696000 | 0.816852000  | -0.993015000 |
| 1 | -3.079073000 | 0.812864000  | -1.461685000 |
| 6 | -1.338358000 | -0.472869000 | -1.407355000 |
| 1 | -1.232967000 | -0.488868000 | -2.501617000 |
| 6 | -2.155913000 | -1.694950000 | -0.951005000 |
| 1 | -3.147009000 | -1.663968000 | -1.421191000 |
| 1 | -1.685253000 | -2.627287000 | -1.279354000 |
| 6 | 0.078968000  | -0.473428000 | -0.778513000 |
| 6 | 0.916278000  | -1.685512000 | -1.239372000 |
| 1 | 1.019665000  | -1.646265000 | -2.332290000 |
| 1 | 0.409684000  | -2.626744000 | -1.011109000 |
| 6 | 2.306746000  | -1.679645000 | -0.581126000 |
| 1 | 2.867046000  | -2.565311000 | -0.904831000 |
| 6 | 2.155913000  | -1.694950000 | 0.951005000  |
| 1 | 3.147010000  | -1.663968000 | 1.421192000  |
| 1 | 1.685254000  | -2.627287000 | 1.279353000  |
| 6 | 1.338359000  | -0.472869000 | 1.407355000  |
| 1 | 1.232968000  | -0.488869000 | 2.501617000  |
| 6 | 2.085695000  | 0.816852000  | 0.993016000  |
| 1 | 3.079072000  | 0.812865000  | 1.461685000  |
| 6 | 1.313820000  | 2.065039000  | 1.432659000  |
| 1 | 1.872854000  | 2.968289000  | 1.156090000  |
| 1 | 1.203679000  | 2.076421000  | 2.524751000  |
| 6 | 0.851855000  | 0.815856000  | -1.185363000 |

|   |             |              |              |
|---|-------------|--------------|--------------|
| 1 | 0.961176000 | 0.812185000  | -2.280172000 |
| 6 | 2.254288000 | 0.816365000  | -0.542684000 |
| 1 | 2.777186000 | 1.734853000  | -0.842942000 |
| 6 | 3.056734000 | -0.407052000 | -0.998709000 |
| 1 | 4.058640000 | -0.390675000 | -0.550927000 |
| 1 | 3.189092000 | -0.385411000 | -2.088041000 |

---

**M1**

|   |              |              |              |
|---|--------------|--------------|--------------|
| 1 | -3.505162000 | 2.712000000  | -2.475472000 |
| 6 | -2.684566000 | 1.732215000  | 0.757929000  |
| 6 | -2.396031000 | 2.009358000  | -0.755183000 |
| 6 | -1.986099000 | 0.707849000  | -1.474243000 |
| 1 | -1.046176000 | 0.319842000  | -1.076815000 |
| 1 | -1.803228000 | 0.931151000  | -2.534069000 |
| 6 | -3.080014000 | -0.365442000 | -1.345062000 |
| 1 | -2.746792000 | -1.286228000 | -1.839265000 |
| 6 | -4.366441000 | 0.148815000  | -2.006166000 |
| 1 | -5.158468000 | -0.607939000 | -1.938996000 |
| 1 | -4.193487000 | 0.342234000  | -3.072602000 |
| 6 | -4.807617000 | 1.438269000  | -1.303370000 |
| 1 | -5.724467000 | 1.820193000  | -1.773110000 |
| 6 | -3.711591000 | 2.518756000  | -1.412181000 |
| 6 | -4.172596000 | 3.827866000  | -0.749002000 |
| 1 | -5.092130000 | 4.172075000  | -1.241758000 |
| 6 | -3.080014000 | 4.893321000  | -0.884242000 |
| 1 | -2.885343000 | 5.097418000  | -1.945083000 |
| 1 | -3.410695000 | 5.836493000  | -0.430448000 |
| 6 | -1.800737000 | 4.402592000  | -0.198387000 |
| 1 | -1.017062000 | 5.166934000  | -0.288205000 |
| 6 | -1.292015000 | 3.093984000  | -0.846771000 |
| 1 | -1.075990000 | 3.280677000  | -1.908442000 |
| 6 | -0.005095000 | 2.645233000  | -0.131648000 |
| 1 | 0.755091000  | 3.431596000  | -0.221304000 |
| 1 | 0.416031000  | 1.754860000  | -0.606764000 |
| 6 | -0.301388000 | 2.376446000  | 1.354944000  |
| 1 | 0.610639000  | 2.030125000  | 1.856893000  |
| 6 | -0.795329000 | 3.674536000  | 2.008650000  |
| 1 | -0.996116000 | 3.509193000  | 3.074878000  |
| 1 | -0.024088000 | 4.452455000  | 1.941501000  |
| 6 | -2.073867000 | 4.135675000  | 1.298728000  |
| 1 | -2.441317000 | 5.060961000  | 1.763417000  |
| 6 | -3.173654000 | 3.059127000  | 1.407364000  |
| 1 | -3.374718000 | 2.860410000  | 2.470664000  |
| 6 | -4.471808000 | 3.539953000  | 0.736925000  |
| 1 | -4.802108000 | 4.467408000  | 1.224354000  |
| 6 | -5.556467000 | 2.466462000  | 0.872260000  |
| 1 | -5.768196000 | 2.279919000  | 1.933063000  |
| 1 | -6.491913000 | 2.811512000  | 0.413192000  |
| 6 | -5.085063000 | 1.175980000  | 0.193774000  |
| 1 | -5.863313000 | 0.406126000  | 0.283583000  |

|   |              |              |              |
|---|--------------|--------------|--------------|
| 6 | -3.788104000 | 0.647378000  | 0.849655000  |
| 1 | -3.982973000 | 0.439750000  | 1.911587000  |
| 6 | -3.358626000 | -0.650265000 | 0.141997000  |
| 1 | -4.159697000 | -1.394876000 | 0.231762000  |
| 1 | -2.476082000 | -1.085725000 | 0.619845000  |
| 6 | -1.393626000 | 1.301371000  | 1.483010000  |
| 1 | -1.623863000 | 1.127169000  | 2.542910000  |
| 1 | -1.022284000 | 0.353175000  | 1.090808000  |
| 1 | 3.505162000  | -2.712000000 | -2.475472000 |
| 6 | 2.684566000  | -1.732215000 | 0.757929000  |
| 6 | 2.396031000  | -2.009358000 | -0.755183000 |
| 6 | 1.986099000  | -0.707849000 | -1.474243000 |
| 1 | 1.046176000  | -0.319842000 | -1.076815000 |
| 1 | 1.803228000  | -0.931151000 | -2.534069000 |
| 6 | 3.080014000  | 0.365442000  | -1.345062000 |
| 1 | 2.746792000  | 1.286228000  | -1.839265000 |
| 6 | 4.366441000  | -0.148815000 | -2.006166000 |
| 1 | 5.158468000  | 0.607939000  | -1.938996000 |
| 1 | 4.193487000  | -0.342234000 | -3.072602000 |
| 6 | 4.807617000  | -1.438269000 | -1.303370000 |
| 1 | 5.724467000  | -1.820193000 | -1.773110000 |
| 6 | 3.711591000  | -2.518756000 | -1.412181000 |
| 6 | 4.172596000  | -3.827866000 | -0.749002000 |
| 1 | 5.092130000  | -4.172075000 | -1.241758000 |
| 6 | 3.080014000  | -4.893321000 | -0.884242000 |
| 1 | 2.885343000  | -5.097418000 | -1.945083000 |
| 1 | 3.410695000  | -5.836493000 | -0.430448000 |
| 6 | 1.800737000  | -4.402592000 | -0.198387000 |
| 1 | 1.017062000  | -5.166934000 | -0.288205000 |
| 6 | 1.292015000  | -3.093984000 | -0.846771000 |
| 1 | 1.075990000  | -3.280677000 | -1.908442000 |
| 6 | 0.005095000  | -2.645233000 | -0.131648000 |
| 1 | -0.755091000 | -3.431596000 | -0.221304000 |
| 1 | -0.416031000 | -1.754860000 | -0.606764000 |
| 6 | 0.301388000  | -2.376446000 | 1.354944000  |
| 1 | -0.610639000 | -2.030125000 | 1.856893000  |
| 6 | 0.795329000  | -3.674536000 | 2.008650000  |
| 1 | 0.996116000  | -3.509193000 | 3.074878000  |
| 1 | 0.024088000  | -4.452455000 | 1.941501000  |
| 6 | 2.073867000  | -4.135675000 | 1.298728000  |
| 1 | 2.441317000  | -5.060961000 | 1.763417000  |
| 6 | 3.173654000  | -3.059127000 | 1.407364000  |
| 1 | 3.374718000  | -2.860410000 | 2.470664000  |
| 6 | 4.471808000  | -3.539953000 | 0.736925000  |
| 1 | 4.802108000  | -4.467408000 | 1.224354000  |
| 6 | 5.556467000  | -2.466462000 | 0.872260000  |
| 1 | 5.768196000  | -2.279919000 | 1.933063000  |
| 1 | 6.491913000  | -2.811512000 | 0.413192000  |
| 6 | 5.085063000  | -1.175980000 | 0.193774000  |
| 1 | 5.863313000  | -0.406126000 | 0.283583000  |

|   |             |              |             |
|---|-------------|--------------|-------------|
| 6 | 3.788104000 | -0.647378000 | 0.849655000 |
| 1 | 3.982973000 | -0.439750000 | 1.911587000 |
| 6 | 3.358626000 | 0.650265000  | 0.141997000 |
| 1 | 4.159697000 | 1.394876000  | 0.231762000 |
| 1 | 2.476082000 | 1.085725000  | 0.619845000 |
| 6 | 1.393626000 | -1.301371000 | 1.483010000 |
| 1 | 1.623863000 | -1.127169000 | 2.542910000 |
| 1 | 1.022284000 | -0.353175000 | 1.090808000 |

---

**M2**

|   |              |              |              |
|---|--------------|--------------|--------------|
| 1 | -5.570421000 | -1.060211000 | 0.739069000  |
| 6 | -2.571271000 | 0.241837000  | -0.441859000 |
| 6 | -4.121117000 | 0.223537000  | -0.229148000 |
| 6 | -4.853693000 | 0.129032000  | -1.584338000 |
| 1 | -4.667858000 | 1.014423000  | -2.197639000 |
| 1 | -5.935980000 | 0.102562000  | -1.398164000 |
| 6 | -4.424656000 | -1.129588000 | -2.358391000 |
| 1 | -4.939006000 | -1.154966000 | -3.326846000 |
| 6 | -4.793269000 | -2.374407000 | -1.539453000 |
| 1 | -4.508756000 | -3.285364000 | -2.081512000 |
| 1 | -5.878739000 | -2.417192000 | -1.382687000 |
| 6 | -4.069523000 | -2.315673000 | -0.189994000 |
| 1 | -4.331833000 | -3.198337000 | 0.409355000  |
| 6 | -4.480079000 | -1.049947000 | 0.591862000  |
| 6 | -3.793575000 | -1.017296000 | 1.967996000  |
| 1 | -4.078073000 | -1.917946000 | 2.529005000  |
| 6 | -4.228314000 | 0.233854000  | 2.737485000  |
| 1 | -5.314290000 | 0.217064000  | 2.896683000  |
| 1 | -3.757843000 | 0.252882000  | 3.729034000  |
| 6 | -3.830367000 | 1.483360000  | 1.945424000  |
| 1 | -4.134138000 | 2.382932000  | 2.497654000  |
| 6 | -4.513793000 | 1.501231000  | 0.557286000  |
| 1 | -5.604400000 | 1.501880000  | 0.696540000  |
| 6 | -4.090457000 | 2.776579000  | -0.194576000 |
| 1 | -4.392038000 | 3.656929000  | 0.387068000  |
| 1 | -4.601744000 | 2.851554000  | -1.159747000 |
| 6 | -2.563716000 | 2.782327000  | -0.393121000 |
| 1 | -2.267140000 | 3.678660000  | -0.951596000 |
| 6 | -1.880814000 | 2.775735000  | 0.981367000  |
| 1 | -0.790852000 | 2.802499000  | 0.864346000  |
| 1 | -2.164533000 | 3.669748000  | 1.551290000  |
| 6 | -2.299326000 | 1.512038000  | 1.740497000  |
| 1 | -1.807095000 | 1.490336000  | 2.722629000  |
| 6 | -1.891948000 | 0.246552000  | 0.958348000  |
| 1 | -0.804620000 | 0.257835000  | 0.805024000  |
| 6 | -2.266918000 | -1.019258000 | 1.747127000  |
| 1 | -1.759506000 | -0.993679000 | 2.721304000  |
| 6 | -1.836309000 | -2.266610000 | 0.969849000  |
| 1 | -0.748086000 | -2.268363000 | 0.837290000  |
| 1 | -2.090934000 | -3.172642000 | 1.534767000  |

|   |              |              |              |
|---|--------------|--------------|--------------|
| 6 | -2.537903000 | -2.286546000 | -0.391885000 |
| 1 | -2.232620000 | -3.181423000 | -0.951024000 |
| 6 | -2.175921000 | -1.035261000 | -1.226706000 |
| 1 | -1.090700000 | -1.017696000 | -1.395353000 |
| 6 | -2.901543000 | -1.108333000 | -2.582019000 |
| 1 | -2.591363000 | -2.018971000 | -3.110065000 |
| 1 | -2.620333000 | -0.266638000 | -3.223132000 |
| 6 | -2.140616000 | 1.528502000  | -1.177509000 |
| 1 | -1.050701000 | 1.514524000  | -1.303739000 |
| 1 | -2.565009000 | 1.569633000  | -2.183810000 |
| 1 | 0.804621000  | 0.257836000  | -0.805027000 |
| 6 | 4.121116000  | 0.223537000  | 0.229149000  |
| 6 | 2.571271000  | 0.241837000  | 0.441858000  |
| 6 | 2.140615000  | 1.528501000  | 1.177508000  |
| 1 | 2.565007000  | 1.569631000  | 2.183810000  |
| 1 | 1.050699000  | 1.514523000  | 1.303736000  |
| 6 | 2.563715000  | 2.782326000  | 0.393122000  |
| 1 | 2.267138000  | 3.678660000  | 0.951596000  |
| 6 | 1.880816000  | 2.775735000  | -0.981368000 |
| 1 | 2.164535000  | 3.669748000  | -1.551290000 |
| 1 | 0.790853000  | 2.802499000  | -0.864348000 |
| 6 | 2.299328000  | 1.512038000  | -1.740498000 |
| 1 | 1.807099000  | 1.490337000  | -2.722631000 |
| 6 | 1.891949000  | 0.246552000  | -0.958350000 |
| 6 | 2.266920000  | -1.019257000 | -1.747129000 |
| 1 | 1.759509000  | -0.993678000 | -2.721306000 |
| 6 | 1.836310000  | -2.266610000 | -0.969851000 |
| 1 | 0.748087000  | -2.268363000 | -0.837295000 |
| 1 | 2.090936000  | -3.172641000 | -1.534770000 |
| 6 | 2.537903000  | -2.286547000 | 0.391883000  |
| 1 | 2.232619000  | -3.181424000 | 0.951021000  |
| 6 | 2.175919000  | -1.035262000 | 1.226704000  |
| 1 | 1.090698000  | -1.017697000 | 1.395349000  |
| 6 | 2.901540000  | -1.108334000 | 2.582018000  |
| 1 | 2.591358000  | -2.018972000 | 3.110063000  |
| 1 | 2.620328000  | -0.266640000 | 3.223131000  |
| 6 | 4.424653000  | -1.129590000 | 2.358392000  |
| 1 | 4.939001000  | -1.154967000 | 3.326848000  |
| 6 | 4.793267000  | -2.374408000 | 1.539454000  |
| 1 | 5.878737000  | -2.417193000 | 1.382689000  |
| 1 | 4.508753000  | -3.285365000 | 2.081512000  |
| 6 | 4.069523000  | -2.315673000 | 0.189994000  |
| 1 | 4.331833000  | -3.198337000 | -0.409355000 |
| 6 | 4.480079000  | -1.049947000 | -0.591861000 |
| 1 | 5.570421000  | -1.060211000 | -0.739067000 |
| 6 | 3.793578000  | -1.017296000 | -1.967996000 |
| 1 | 4.078076000  | -1.917945000 | -2.529004000 |
| 6 | 4.228318000  | 0.233855000  | -2.737484000 |
| 1 | 5.314294000  | 0.217064000  | -2.896679000 |
| 1 | 3.757848000  | 0.252883000  | -3.729033000 |

|   |             |             |              |
|---|-------------|-------------|--------------|
| 6 | 3.830370000 | 1.483360000 | -1.945423000 |
| 1 | 4.134142000 | 2.382933000 | -2.497652000 |
| 6 | 4.513794000 | 1.501231000 | -0.557284000 |
| 1 | 5.604401000 | 1.501880000 | -0.696536000 |
| 6 | 4.090457000 | 2.776579000 | 0.194578000  |
| 1 | 4.392039000 | 3.656929000 | -0.387065000 |
| 1 | 4.601742000 | 2.851554000 | 1.159750000  |
| 6 | 4.853691000 | 0.129031000 | 1.584341000  |
| 1 | 5.935978000 | 0.102561000 | 1.398167000  |
| 1 | 4.667855000 | 1.014422000 | 2.197642000  |

---

**M3**


---

|   |              |              |              |
|---|--------------|--------------|--------------|
| 1 | -3.282957000 | -0.315562000 | -2.491761000 |
| 6 | -4.362175000 | 0.400655000  | 0.734990000  |
| 6 | -4.451788000 | 0.424961000  | -0.827203000 |
| 6 | -4.389418000 | 1.875406000  | -1.352004000 |
| 1 | -5.251766000 | 2.456199000  | -1.014693000 |
| 1 | -4.439539000 | 1.854774000  | -2.449159000 |
| 6 | -3.094146000 | 2.572658000  | -0.900022000 |
| 1 | -3.091441000 | 3.607569000  | -1.263372000 |
| 6 | -1.887975000 | 1.815661000  | -1.472916000 |
| 1 | -0.953137000 | 2.306299000  | -1.171743000 |
| 1 | -1.918575000 | 1.825809000  | -2.569953000 |
| 6 | -1.916817000 | 0.372536000  | -0.959159000 |
| 1 | -1.064431000 | -0.184154000 | -1.369330000 |
| 6 | -3.216287000 | -0.334155000 | -1.393668000 |
| 6 | -3.215905000 | -1.797390000 | -0.920781000 |
| 1 | -2.342199000 | -2.308599000 | -1.347711000 |
| 6 | -4.501986000 | -2.491451000 | -1.379849000 |
| 1 | -4.559517000 | -2.485134000 | -2.476007000 |
| 1 | -4.501186000 | -3.542565000 | -1.063597000 |
| 6 | -5.712951000 | -1.766591000 | -0.783380000 |
| 1 | -6.637015000 | -2.265835000 | -1.104845000 |
| 6 | -5.761632000 | -0.291044000 | -1.246395000 |
| 1 | -5.837381000 | -0.262976000 | -2.342872000 |
| 6 | -6.996352000 | 0.388948000  | -0.627481000 |
| 1 | -7.901926000 | -0.139073000 | -0.952213000 |
| 1 | -7.094680000 | 1.420589000  | -0.980607000 |
| 6 | -6.896657000 | 0.353936000  | 0.908516000  |
| 1 | -7.764943000 | 0.862062000  | 1.345560000  |
| 6 | -6.858525000 | -1.107787000 | 1.375661000  |
| 1 | -6.804237000 | -1.154319000 | 2.470884000  |
| 1 | -7.777044000 | -1.627982000 | 1.075113000  |
| 6 | -5.635987000 | -1.796351000 | 0.759353000  |
| 1 | -5.593075000 | -2.842367000 | 1.092810000  |
| 6 | -4.336940000 | -1.087097000 | 1.194478000  |
| 1 | -4.274327000 | -1.099718000 | 2.292880000  |
| 6 | -3.107891000 | -1.810220000 | 0.618315000  |
| 1 | -3.109090000 | -2.850554000 | 0.971203000  |
| 6 | -1.827689000 | -1.105838000 | 1.078105000  |



|   |              |              |              |
|---|--------------|--------------|--------------|
| 1 | -1.758125000 | -1.130755000 | 2.173420000  |
| 1 | -0.944919000 | -1.629094000 | 0.689302000  |
| 6 | -1.839143000 | 0.343154000  | 0.583046000  |
| 1 | -0.921866000 | 0.850429000  | 0.904351000  |
| 6 | -3.051481000 | 1.114774000  | 1.153770000  |
| 1 | -2.990328000 | 1.114001000  | 2.251530000  |
| 6 | -3.009146000 | 2.564082000  | 0.637207000  |
| 1 | -2.071619000 | 3.035479000  | 0.959070000  |
| 1 | -3.820567000 | 3.159347000  | 1.068321000  |
| 6 | -5.608175000 | 1.062513000  | 1.360823000  |
| 1 | -5.519410000 | 1.015129000  | 2.454708000  |
| 1 | -5.665491000 | 2.122821000  | 1.101686000  |
| 1 | 4.274337000  | -1.099713000 | -2.292882000 |
| 6 | 4.451785000  | 0.424959000  | 0.827205000  |
| 6 | 4.362179000  | 0.400657000  | -0.734989000 |
| 6 | 5.608182000  | 1.062515000  | -1.360814000 |
| 1 | 5.665499000  | 2.122822000  | -1.101674000 |
| 1 | 5.519423000  | 1.015133000  | -2.454699000 |
| 6 | 6.896662000  | 0.353935000  | -0.908502000 |
| 1 | 7.764950000  | 0.862061000  | -1.345541000 |
| 6 | 6.858530000  | -1.107787000 | -1.375651000 |
| 1 | 7.777048000  | -1.627983000 | -1.075100000 |
| 1 | 6.804248000  | -1.154316000 | -2.470874000 |
| 6 | 5.635989000  | -1.796350000 | -0.759351000 |
| 1 | 5.593077000  | -2.842366000 | -1.092810000 |
| 6 | 4.336945000  | -1.087094000 | -1.194480000 |
| 6 | 3.107892000  | -1.810217000 | -0.618324000 |
| 1 | 3.109092000  | -2.850550000 | -0.971214000 |
| 6 | 1.827693000  | -1.105833000 | -1.078119000 |
| 1 | 1.758134000  | -1.130747000 | -2.173434000 |
| 1 | 0.944921000  | -1.629089000 | -0.689321000 |
| 6 | 1.839146000  | 0.343158000  | -0.583056000 |
| 1 | 0.921871000  | 0.850434000  | -0.904365000 |
| 6 | 3.051488000  | 1.114778000  | -1.153773000 |
| 1 | 2.990340000  | 1.114008000  | -2.251533000 |
| 6 | 3.009152000  | 2.564085000  | -0.637207000 |
| 1 | 2.071627000  | 3.035484000  | -0.959073000 |
| 1 | 3.820575000  | 3.159350000  | -1.068315000 |
| 6 | 3.094145000  | 2.572658000  | 0.900022000  |
| 1 | 3.091439000  | 3.607568000  | 1.263375000  |
| 6 | 1.887971000  | 1.815660000  | 1.472909000  |
| 1 | 1.918565000  | 1.825806000  | 2.569946000  |
| 1 | 0.953134000  | 2.306300000  | 1.171734000  |
| 6 | 1.916814000  | 0.372537000  | 0.959149000  |
| 1 | 1.064426000  | -0.184153000 | 1.369315000  |
| 6 | 3.216280000  | -0.334156000 | 1.393662000  |
| 1 | 3.282946000  | -0.315566000 | 2.491756000  |
| 6 | 3.215899000  | -1.797390000 | 0.920772000  |
| 1 | 2.342191000  | -2.308599000 | 1.347698000  |
| 6 | 4.501977000  | -2.491454000 | 1.379845000  |

|   |             |              |             |
|---|-------------|--------------|-------------|
| 1 | 4.559503000 | -2.485139000 | 2.476003000 |
| 1 | 4.501177000 | -3.542568000 | 1.063591000 |
| 6 | 5.712946000 | -1.766594000 | 0.783383000 |
| 1 | 6.637008000 | -2.265840000 | 1.104852000 |
| 6 | 5.761626000 | -0.291048000 | 1.246402000 |
| 1 | 5.837370000 | -0.262982000 | 2.342880000 |
| 6 | 6.996350000 | 0.388944000  | 0.627495000 |
| 1 | 7.901921000 | -0.139078000 | 0.952230000 |
| 1 | 7.094678000 | 1.420584000  | 0.980624000 |
| 6 | 4.389414000 | 1.875403000  | 1.352009000 |
| 1 | 4.439530000 | 1.854769000  | 2.449164000 |
| 1 | 5.251764000 | 2.456196000  | 1.014703000 |

---

**MP1**

|   |              |              |              |
|---|--------------|--------------|--------------|
| 1 | -5.174164000 | 0.373296000  | 2.354681000  |
| 6 | -3.597898000 | 0.214856000  | -0.740813000 |
| 6 | -3.723803000 | -0.031440000 | 0.799883000  |
| 6 | -2.610485000 | 0.716548000  | 1.563343000  |
| 1 | -1.622239000 | 0.330839000  | 1.301736000  |
| 1 | -2.738861000 | 0.533420000  | 2.638762000  |
| 6 | -2.660412000 | 2.226512000  | 1.277341000  |
| 1 | -1.841028000 | 2.725479000  | 1.809096000  |
| 6 | -4.008963000 | 2.783636000  | 1.754182000  |
| 1 | -4.060892000 | 3.864642000  | 1.571544000  |
| 1 | -4.120214000 | 2.632605000  | 2.835608000  |
| 6 | -5.137964000 | 2.066936000  | 1.005117000  |
| 1 | -6.109666000 | 2.451726000  | 1.344362000  |
| 6 | -5.089474000 | 0.548289000  | 1.271579000  |
| 6 | -6.252169000 | -0.164420000 | 0.560603000  |
| 1 | -7.201309000 | 0.252714000  | 0.924220000  |
| 6 | -6.198599000 | -1.667301000 | 0.853203000  |
| 1 | -6.298530000 | -1.841807000 | 1.932314000  |
| 1 | -7.037703000 | -2.179961000 | 0.365273000  |
| 6 | -4.870295000 | -2.239192000 | 0.347165000  |
| 1 | -4.831740000 | -3.318121000 | 0.549515000  |
| 6 | -3.671044000 | -1.560262000 | 1.049828000  |
| 1 | -3.743715000 | -1.737907000 | 2.132444000  |
| 6 | -2.362520000 | -2.169703000 | 0.515470000  |
| 1 | -2.353542000 | -3.248108000 | 0.718515000  |
| 1 | -1.495306000 | -1.749136000 | 1.034562000  |
| 6 | -2.253583000 | -1.924929000 | -1.000444000 |
| 1 | -1.308461000 | -2.337921000 | -1.372355000 |
| 6 | -3.435440000 | -2.605918000 | -1.704917000 |
| 1 | -3.366076000 | -2.456885000 | -2.790083000 |
| 1 | -3.414218000 | -3.688474000 | -1.525304000 |
| 6 | -4.743856000 | -2.008584000 | -1.175273000 |
| 1 | -5.597807000 | -2.482852000 | -1.678415000 |
| 6 | -4.796423000 | -0.489939000 | -1.441723000 |
| 1 | -4.704392000 | -0.314335000 | -2.524014000 |
| 6 | -6.129801000 | 0.100840000  | -0.954040000 |

|   |              |              |              |
|---|--------------|--------------|--------------|
| 1 | -6.955141000 | -0.402630000 | -1.476038000 |
| 6 | -6.170033000 | 1.604357000  | -1.245722000 |
| 1 | -6.093776000 | 1.777740000  | -2.326958000 |
| 1 | -7.127638000 | 2.029610000  | -0.918419000 |
| 6 | -5.013641000 | 2.297379000  | -0.517289000 |
| 1 | -5.044351000 | 3.376749000  | -0.718756000 |
| 6 | -3.648518000 | 1.743831000  | -0.990031000 |
| 1 | -3.544623000 | 1.923048000  | -2.069908000 |
| 6 | -2.520261000 | 2.472628000  | -0.236311000 |
| 1 | -2.582146000 | 3.548531000  | -0.443538000 |
| 1 | -1.536348000 | 2.144501000  | -0.586569000 |
| 6 | -2.299913000 | -0.414857000 | -1.286144000 |
| 1 | -2.250852000 | -0.238164000 | -2.369457000 |
| 1 | -1.420281000 | 0.065277000  | -0.856109000 |
| 6 | 4.014125000  | -0.415497000 | -0.826913000 |
| 6 | 2.826690000  | -0.528286000 | -1.806344000 |
| 1 | 2.744597000  | 0.362537000  | -2.434385000 |
| 1 | 3.009463000  | -1.371201000 | -2.486542000 |
| 6 | 1.503722000  | -0.744393000 | -1.050417000 |
| 1 | 0.677898000  | -0.790615000 | -1.769323000 |
| 6 | 1.584616000  | -2.057690000 | -0.260376000 |
| 1 | 1.734694000  | -2.902133000 | -0.945378000 |
| 1 | 0.645349000  | -2.240379000 | 0.275177000  |
| 6 | 2.748760000  | -1.970843000 | 0.731702000  |
| 1 | 2.821910000  | -2.908562000 | 1.299551000  |
| 6 | 4.080717000  | -1.740189000 | -0.011551000 |
| 1 | 4.240191000  | -2.565786000 | -0.721508000 |
| 6 | 5.254074000  | -1.705129000 | 0.981765000  |
| 1 | 5.284912000  | -2.656922000 | 1.529631000  |
| 6 | 5.010010000  | -0.553839000 | 1.979677000  |
| 1 | 5.841834000  | -0.515369000 | 2.696209000  |
| 6 | 3.688535000  | -0.755310000 | 2.728003000  |
| 1 | 3.718049000  | -1.686514000 | 3.308319000  |
| 1 | 3.534085000  | 0.064242000  | 3.441757000  |
| 6 | 2.535351000  | -0.803160000 | 1.721157000  |
| 1 | 1.585740000  | -0.953883000 | 2.252721000  |
| 6 | 2.447274000  | 0.515039000  | 0.916815000  |
| 1 | 2.274144000  | 1.348150000  | 1.613222000  |
| 6 | 1.271445000  | 0.418208000  | -0.070567000 |
| 1 | 0.347762000  | 0.249830000  | 0.495941000  |
| 1 | 1.133595000  | 1.357985000  | -0.615311000 |
| 6 | 3.787593000  | 0.762199000  | 0.178529000  |
| 6 | 3.799337000  | 2.117094000  | -0.561151000 |
| 1 | 3.651909000  | 2.920002000  | 0.173848000  |
| 1 | 2.968733000  | 2.189450000  | -1.267857000 |
| 6 | 5.127676000  | 2.327491000  | -1.307852000 |
| 1 | 5.096653000  | 3.283352000  | -1.845057000 |
| 6 | 5.348523000  | 1.178854000  | -2.308844000 |
| 1 | 6.308849000  | 1.313868000  | -2.822470000 |
| 1 | 4.576352000  | 1.194193000  | -3.084762000 |

|   |             |              |              |
|---|-------------|--------------|--------------|
| 6 | 5.356064000 | -0.168696000 | -1.563824000 |
| 1 | 5.512943000 | -0.985556000 | -2.282824000 |
| 6 | 6.514956000 | -0.171123000 | -0.538821000 |
| 1 | 7.459858000 | -0.015944000 | -1.076981000 |
| 6 | 6.569844000 | -1.497825000 | 0.225370000  |
| 1 | 7.414652000 | -1.492179000 | 0.926133000  |
| 1 | 6.735407000 | -2.329450000 | -0.471741000 |
| 6 | 4.969205000 | 0.766874000  | 1.192566000  |
| 1 | 4.805828000 | 1.596171000  | 1.897170000  |
| 6 | 6.301239000 | 0.996987000  | 0.449309000  |
| 1 | 7.117872000 | 0.994554000  | 1.184419000  |
| 6 | 6.279655000 | 2.337305000  | -0.293484000 |
| 1 | 7.236629000 | 2.501287000  | -0.805216000 |
| 1 | 6.149211000 | 3.160974000  | 0.420030000  |

---

**MP2**


---

|   |             |              |              |
|---|-------------|--------------|--------------|
| 1 | 4.843389000 | 0.685898000  | -2.203516000 |
| 6 | 3.084796000 | -0.044669000 | 0.704943000  |
| 6 | 3.269425000 | 0.088563000  | -0.843205000 |
| 6 | 2.292110000 | 1.135869000  | -1.417347000 |
| 1 | 1.254310000 | 0.821326000  | -1.289319000 |
| 1 | 2.459110000 | 1.216705000  | -2.500050000 |
| 6 | 2.499326000 | 2.507638000  | -0.752591000 |
| 1 | 1.773629000 | 3.222887000  | -1.159444000 |
| 6 | 3.927035000 | 2.994236000  | -1.037834000 |
| 1 | 4.091469000 | 3.980225000  | -0.584727000 |
| 1 | 4.080913000 | 3.105222000  | -2.118839000 |
| 6 | 4.923077000 | 1.978287000  | -0.467092000 |
| 1 | 5.949683000 | 2.311858000  | -0.671939000 |
| 6 | 4.717019000 | 0.593055000  | -1.114509000 |
| 6 | 5.748634000 | -0.413697000 | -0.578177000 |
| 1 | 6.758088000 | -0.039699000 | -0.797207000 |
| 6 | 5.542720000 | -1.776595000 | -1.246670000 |
| 1 | 5.683748000 | -1.686584000 | -2.331521000 |
| 1 | 6.289113000 | -2.494838000 | -0.883507000 |
| 6 | 4.131510000 | -2.287368000 | -0.938865000 |
| 1 | 3.982366000 | -3.267693000 | -1.411259000 |
| 6 | 3.059436000 | -1.310848000 | -1.477270000 |
| 1 | 3.174149000 | -1.219033000 | -2.566791000 |
| 6 | 1.662661000 | -1.869723000 | -1.152350000 |
| 1 | 1.546188000 | -2.855019000 | -1.621163000 |
| 1 | 0.879889000 | -1.231819000 | -1.574273000 |
| 6 | 1.494118000 | -1.997384000 | 0.372494000  |
| 1 | 0.490206000 | -2.371560000 | 0.602897000  |
| 6 | 2.547912000 | -2.973458000 | 0.913105000  |
| 1 | 2.433107000 | -3.091238000 | 1.998250000  |
| 1 | 2.413197000 | -3.965799000 | 0.464095000  |
| 6 | 3.944055000 | -2.431060000 | 0.587912000  |
| 1 | 4.708020000 | -3.118326000 | 0.976669000  |
| 6 | 4.152093000 | -1.046168000 | 1.235120000  |

|   |              |              |              |
|---|--------------|--------------|--------------|
| 1 | 4.018291000  | -1.137145000 | 2.323420000  |
| 6 | 5.570147000  | -0.523479000 | 0.950259000  |
| 1 | 6.300539000  | -1.241288000 | 1.347917000  |
| 6 | 5.765946000  | 0.841382000  | 1.617731000  |
| 1 | 5.647915000  | 0.746804000  | 2.704960000  |
| 1 | 6.783182000  | 1.211325000  | 1.435414000  |
| 6 | 4.740181000  | 1.833365000  | 1.060211000  |
| 1 | 4.881553000  | 2.815102000  | 1.532026000  |
| 6 | 3.296304000  | 1.353939000  | 1.339676000  |
| 1 | 3.151929000  | 1.267333000  | 2.426169000  |
| 6 | 2.305580000  | 2.384534000  | 0.769722000  |
| 1 | 2.481609000  | 3.358048000  | 1.244647000  |
| 1 | 1.273801000  | 2.108023000  | 1.004071000  |
| 6 | 1.692943000  | -0.622923000 | 1.033604000  |
| 1 | 1.594527000  | -0.713900000 | 2.123953000  |
| 1 | 0.902198000  | 0.056280000  | 0.708822000  |
| 6 | -3.084797000 | 0.044670000  | -0.704944000 |
| 6 | -1.692944000 | 0.622924000  | -1.033606000 |
| 1 | -0.902197000 | -0.056278000 | -0.708825000 |
| 1 | -1.594529000 | 0.713901000  | -2.123955000 |
| 6 | -1.494119000 | 1.997385000  | -0.372496000 |
| 1 | -0.490208000 | 2.371562000  | -0.602901000 |
| 6 | -2.547914000 | 2.973459000  | -0.913106000 |
| 1 | -2.433110000 | 3.091239000  | -1.998252000 |
| 1 | -2.413199000 | 3.965800000  | -0.464097000 |
| 6 | -3.944056000 | 2.431060000  | -0.587912000 |
| 1 | -4.708023000 | 3.118325000  | -0.976668000 |
| 6 | -4.152094000 | 1.046168000  | -1.235120000 |
| 1 | -4.018293000 | 1.137145000  | -2.323419000 |
| 6 | -5.570147000 | 0.523478000  | -0.950257000 |
| 1 | -6.300541000 | 1.241287000  | -1.347914000 |
| 6 | -5.748634000 | 0.413696000  | 0.578179000  |
| 1 | -6.758088000 | 0.039697000  | 0.797210000  |
| 6 | -5.542720000 | 1.776594000  | 1.246672000  |
| 1 | -6.289113000 | 2.494837000  | 0.883510000  |
| 1 | -5.683747000 | 1.686583000  | 2.331523000  |
| 6 | -4.131510000 | 2.287368000  | 0.938865000  |
| 1 | -3.982366000 | 3.267693000  | 1.411259000  |
| 6 | -3.059435000 | 1.310849000  | 1.477269000  |
| 1 | -3.174146000 | 1.219033000  | 2.566790000  |
| 6 | -1.662660000 | 1.869724000  | 1.152348000  |
| 1 | -1.546188000 | 2.855020000  | 1.621160000  |
| 1 | -0.879888000 | 1.231821000  | 1.574271000  |
| 6 | -3.269424000 | -0.088563000 | 0.843205000  |
| 6 | -2.292108000 | -1.135868000 | 1.417346000  |
| 1 | -2.459107000 | -1.216704000 | 2.500049000  |
| 1 | -1.254309000 | -0.821325000 | 1.289318000  |
| 6 | -2.499324000 | -2.507637000 | 0.752590000  |
| 1 | -1.773627000 | -3.222886000 | 1.159443000  |
| 6 | -2.305579000 | -2.384533000 | -0.769723000 |

|   |              |              |              |
|---|--------------|--------------|--------------|
| 1 | -2.481609000 | -3.358048000 | -1.244648000 |
| 1 | -1.273801000 | -2.108022000 | -1.004073000 |
| 6 | -3.296304000 | -1.353939000 | -1.339677000 |
| 1 | -3.151931000 | -1.267333000 | -2.426170000 |
| 6 | -4.740181000 | -1.833365000 | -1.060210000 |
| 1 | -4.881553000 | -2.815103000 | -1.532024000 |
| 6 | -5.765947000 | -0.841383000 | -1.617729000 |
| 1 | -6.783183000 | -1.211326000 | -1.435411000 |
| 1 | -5.647917000 | -0.746805000 | -2.704958000 |
| 6 | -4.717018000 | -0.593055000 | 1.114510000  |
| 1 | -4.843386000 | -0.685898000 | 2.203517000  |
| 6 | -4.923076000 | -1.978287000 | 0.467093000  |
| 1 | -5.949681000 | -2.311858000 | 0.671941000  |
| 6 | -3.927032000 | -2.994237000 | 1.037835000  |
| 1 | -4.091467000 | -3.980225000 | 0.584728000  |
| 1 | -4.080910000 | -3.105223000 | 2.118839000  |

---

**MP3**

|   |              |              |              |
|---|--------------|--------------|--------------|
| 1 | -5.268045000 | 1.264183000  | -1.463080000 |
| 6 | -2.814791000 | -0.073369000 | 0.606926000  |
| 6 | -4.283252000 | 0.271218000  | 0.189379000  |
| 6 | -4.933450000 | 1.216760000  | 1.221733000  |
| 1 | -5.028030000 | 0.733209000  | 2.197366000  |
| 1 | -5.954740000 | 1.449687000  | 0.890987000  |
| 6 | -4.122266000 | 2.515666000  | 1.370089000  |
| 1 | -4.591423000 | 3.153774000  | 2.128917000  |
| 6 | -4.090978000 | 3.247187000  | 0.020908000  |
| 1 | -3.528490000 | 4.185515000  | 0.108999000  |
| 1 | -5.109846000 | 3.509100000  | -0.292056000 |
| 6 | -3.437992000 | 2.336621000  | -1.024384000 |
| 1 | -3.416580000 | 2.845959000  | -1.997664000 |
| 6 | -4.234267000 | 1.023128000  | -1.173595000 |
| 6 | -3.609487000 | 0.131391000  | -2.260096000 |
| 1 | -3.603091000 | 0.680903000  | -3.211339000 |
| 6 | -4.424367000 | -1.156949000 | -2.409335000 |
| 1 | -5.451821000 | -0.917327000 | -2.712436000 |
| 1 | -3.995292000 | -1.788858000 | -3.197665000 |
| 6 | -4.430352000 | -1.913676000 | -1.077171000 |
| 1 | -5.008276000 | -2.841830000 | -1.182115000 |
| 6 | -5.067879000 | -1.058451000 | 0.043308000  |
| 1 | -6.104807000 | -0.820988000 | -0.234504000 |
| 6 | -5.058081000 | -1.864940000 | 1.354716000  |
| 1 | -5.626992000 | -2.792696000 | 1.213542000  |
| 1 | -5.556588000 | -1.313992000 | 2.158826000  |
| 6 | -3.608396000 | -2.198351000 | 1.751589000  |
| 1 | -3.603498000 | -2.749332000 | 2.700014000  |
| 6 | -2.968428000 | -3.053516000 | 0.648994000  |
| 1 | -1.936275000 | -3.310779000 | 0.920383000  |
| 1 | -3.516908000 | -3.996829000 | 0.531256000  |
| 6 | -2.983520000 | -2.265203000 | -0.665113000 |

|   |              |              |              |
|---|--------------|--------------|--------------|
| 1 | -2.522152000 | -2.865021000 | -1.461712000 |
| 6 | -2.188883000 | -0.952386000 | -0.515963000 |
| 1 | -1.158384000 | -1.195666000 | -0.222747000 |
| 6 | -2.157290000 | -0.185748000 | -1.848702000 |
| 1 | -1.694524000 | -0.823712000 | -2.614237000 |
| 6 | -1.347345000 | 1.103471000  | -1.689136000 |
| 1 | -0.316141000 | 0.861971000  | -1.410184000 |
| 1 | -1.303318000 | 1.646641000  | -2.642122000 |
| 6 | -1.991244000 | 1.983256000  | -0.613897000 |
| 1 | -1.412519000 | 2.910333000  | -0.501135000 |
| 6 | -2.029914000 | 1.256238000  | 0.751268000  |
| 1 | -1.002277000 | 1.023697000  | 1.061491000  |
| 6 | -2.680301000 | 2.182433000  | 1.794373000  |
| 1 | -2.093855000 | 3.106704000  | 1.872838000  |
| 1 | -2.669953000 | 1.722714000  | 2.787878000  |
| 6 | -2.803572000 | -0.897704000 | 1.912516000  |
| 1 | -1.764352000 | -1.133093000 | 2.175460000  |
| 1 | -3.208155000 | -0.319884000 | 2.747377000  |
| 6 | 2.814788000  | 0.073380000  | -0.606920000 |
| 6 | 2.803557000  | 0.897748000  | -1.912490000 |
| 1 | 3.208142000  | 0.319953000  | -2.747366000 |
| 1 | 1.764335000  | 1.133136000  | -2.175424000 |
| 6 | 3.608372000  | 2.198398000  | -1.751533000 |
| 1 | 3.603465000  | 2.749404000  | -2.699944000 |
| 6 | 2.968400000  | 3.053530000  | -0.648914000 |
| 1 | 1.936244000  | 3.310791000  | -0.920293000 |
| 1 | 3.516872000  | 3.996845000  | -0.531153000 |
| 6 | 2.983503000  | 2.265184000  | 0.665173000  |
| 1 | 2.522133000  | 2.864979000  | 1.461789000  |
| 6 | 2.188876000  | 0.952364000  | 0.515994000  |
| 1 | 1.158374000  | 1.195642000  | 0.222788000  |
| 6 | 2.157294000  | 0.185693000  | 1.848713000  |
| 1 | 1.694527000  | 0.823634000  | 2.614266000  |
| 6 | 3.609496000  | -0.131445000 | 2.260094000  |
| 1 | 3.603107000  | -0.680981000 | 3.211323000  |
| 6 | 4.424366000  | 1.156898000  | 2.409363000  |
| 1 | 3.995288000  | 1.788784000  | 3.197710000  |
| 1 | 5.451822000  | 0.917277000  | 2.712454000  |
| 6 | 4.430340000  | 1.913658000  | 1.077218000  |
| 1 | 5.008256000  | 2.841815000  | 1.182183000  |
| 6 | 5.067869000  | 1.058467000  | -0.043285000 |
| 1 | 6.104801000  | 0.821005000  | 0.234517000  |
| 6 | 5.058060000  | 1.864989000  | -1.354673000 |
| 1 | 5.626964000  | 2.792746000  | -1.213476000 |
| 1 | 5.556569000  | 1.314066000  | -2.158798000 |
| 6 | 4.283252000  | -0.271205000 | -0.189387000 |
| 6 | 4.933454000  | -1.216715000 | -1.221767000 |
| 1 | 5.954748000  | -1.449643000 | -0.891030000 |
| 1 | 5.028027000  | -0.733140000 | -2.197388000 |
| 6 | 4.122280000  | -2.515624000 | -1.370153000 |

|   |             |              |              |
|---|-------------|--------------|--------------|
| 1 | 4.591441000 | -3.153710000 | -2.128999000 |
| 6 | 2.680311000 | -2.182392000 | -1.794423000 |
| 1 | 2.093873000 | -3.106666000 | -1.872910000 |
| 1 | 2.669956000 | -1.722649000 | -2.787917000 |
| 6 | 2.029921000 | -1.256229000 | -0.751293000 |
| 1 | 1.002281000 | -1.023688000 | -1.061508000 |
| 6 | 1.991261000 | -1.983282000 | 0.613854000  |
| 1 | 1.412543000 | -2.910360000 | 0.501071000  |
| 6 | 1.347359000 | -1.103529000 | 1.689117000  |
| 1 | 1.303340000 | -1.646723000 | 2.642090000  |
| 1 | 0.316152000 | -0.862030000 | 1.410177000  |
| 6 | 4.234279000 | -1.023149000 | 1.173568000  |
| 1 | 5.268060000 | -1.264204000 | 1.463043000  |
| 6 | 3.438013000 | -2.336645000 | 1.024327000  |
| 1 | 3.416609000 | -2.846007000 | 1.997594000  |
| 6 | 4.091003000 | -3.247179000 | -0.020990000 |
| 1 | 3.528523000 | -4.185510000 | -0.109103000 |
| 1 | 5.109874000 | -3.509092000 | 0.291964000  |

---

**MP4**

---

|   |             |              |              |
|---|-------------|--------------|--------------|
| 1 | 5.685163000 | -0.197638000 | -0.987220000 |
| 6 | 2.557916000 | 0.047378000  | 0.511370000  |
| 6 | 4.097595000 | 0.300010000  | 0.397953000  |
| 6 | 4.843276000 | -0.354028000 | 1.580535000  |
| 1 | 4.556123000 | 0.102785000  | 2.531054000  |
| 1 | 5.919970000 | -0.171468000 | 1.461741000  |
| 6 | 4.571752000 | -1.867475000 | 1.636662000  |
| 1 | 5.090400000 | -2.298978000 | 2.501480000  |
| 6 | 5.082545000 | -2.518839000 | 0.343975000  |
| 1 | 4.911781000 | -3.602700000 | 0.369928000  |
| 1 | 6.164519000 | -2.364298000 | 0.243599000  |
| 6 | 4.350045000 | -1.897675000 | -0.850154000 |
| 1 | 4.712809000 | -2.350511000 | -1.783142000 |
| 6 | 4.602215000 | -0.376435000 | -0.910747000 |
| 6 | 3.909456000 | 0.238588000  | -2.138767000 |
| 1 | 4.296361000 | -0.246271000 | -3.045455000 |
| 6 | 4.188320000 | 1.743715000  | -2.194449000 |
| 1 | 5.267789000 | 1.921318000  | -2.284803000 |
| 1 | 3.714093000 | 2.185684000  | -3.080258000 |
| 6 | 3.648144000 | 2.409363000  | -0.924869000 |
| 1 | 3.839634000 | 3.490204000  | -0.964385000 |
| 6 | 4.330763000 | 1.832156000  | 0.338219000  |
| 1 | 5.412782000 | 2.016675000  | 0.275061000  |
| 6 | 3.760611000 | 2.536620000  | 1.583196000  |
| 1 | 3.951645000 | 3.614673000  | 1.508496000  |
| 1 | 4.263687000 | 2.193909000  | 2.493150000  |
| 6 | 2.245076000 | 2.282223000  | 1.678762000  |
| 1 | 1.845878000 | 2.763121000  | 2.580225000  |
| 6 | 1.561725000 | 2.862859000  | 0.432963000  |
| 1 | 0.476948000 | 2.712565000  | 0.488376000  |



|   |              |              |              |
|---|--------------|--------------|--------------|
| 1 | 1.733429000  | 3.945318000  | 0.374962000  |
| 6 | 2.125846000  | 2.171854000  | -0.812745000 |
| 1 | 1.634965000  | 2.570783000  | -1.711263000 |
| 6 | 1.875833000  | 0.651138000  | -0.750784000 |
| 1 | 0.795420000  | 0.473206000  | -0.667217000 |
| 6 | 2.395013000  | -0.033034000 | -2.026332000 |
| 1 | 1.883288000  | 0.401841000  | -2.895890000 |
| 6 | 2.120813000  | -1.538632000 | -1.961809000 |
| 1 | 1.041522000  | -1.722018000 | -1.903000000 |
| 1 | 2.478730000  | -2.028899000 | -2.876356000 |
| 6 | 2.827224000  | -2.133986000 | -0.739977000 |
| 1 | 2.634378000  | -3.214345000 | -0.692407000 |
| 6 | 2.322014000  | -1.483830000 | 0.569801000  |
| 1 | 1.243206000  | -1.666194000 | 0.668089000  |
| 6 | 3.058166000  | -2.119841000 | 1.762542000  |
| 1 | 2.861840000  | -3.199465000 | 1.775224000  |
| 1 | 2.681807000  | -1.724559000 | 2.711607000  |
| 6 | 1.979987000  | 0.768472000  | 1.747341000  |
| 1 | 0.900612000  | 0.577618000  | 1.793988000  |
| 1 | 2.401920000  | 0.367795000  | 2.672513000  |
| 6 | -4.097595000 | -0.300009000 | -0.397954000 |
| 6 | -4.843276000 | 0.354031000  | -1.580535000 |
| 1 | -4.556122000 | -0.102782000 | -2.531055000 |
| 1 | -5.919969000 | 0.171470000  | -1.461741000 |
| 6 | -4.571751000 | 1.867477000  | -1.636659000 |
| 1 | -5.090400000 | 2.298982000  | -2.501476000 |
| 6 | -5.082546000 | 2.518839000  | -0.343972000 |
| 1 | -6.164519000 | 2.364297000  | -0.243595000 |
| 1 | -4.911782000 | 3.602700000  | -0.369923000 |
| 6 | -4.350046000 | 1.897673000  | 0.850157000  |
| 1 | -4.712809000 | 2.350508000  | 1.783146000  |
| 6 | -4.602216000 | 0.376434000  | 0.910748000  |
| 1 | -5.685163000 | 0.197636000  | 0.987220000  |
| 6 | -3.909457000 | -0.238592000 | 2.138767000  |
| 1 | -4.296362000 | 0.246267000  | 3.045455000  |
| 6 | -2.395014000 | 0.033031000  | 2.026333000  |
| 1 | -1.883289000 | -0.401845000 | 2.895890000  |
| 6 | -2.120813000 | 1.538629000  | 1.961812000  |
| 1 | -2.478731000 | 2.028895000  | 2.876360000  |
| 1 | -1.041522000 | 1.722016000  | 1.903003000  |
| 6 | -2.827225000 | 2.133985000  | 0.739981000  |
| 1 | -2.634379000 | 3.214344000  | 0.692413000  |
| 6 | -2.322014000 | 1.483831000  | -0.569799000 |
| 1 | -1.243207000 | 1.666195000  | -0.668086000 |
| 6 | -3.058166000 | 2.119844000  | -1.762539000 |
| 1 | -2.861840000 | 3.199468000  | -1.775218000 |
| 1 | -2.681807000 | 1.724564000  | -2.711603000 |
| 6 | -2.557916000 | -0.047377000 | -0.511370000 |
| 6 | -1.979986000 | -0.768469000 | -1.747341000 |
| 1 | -0.900611000 | -0.577616000 | -1.793988000 |

|   |              |              |              |
|---|--------------|--------------|--------------|
| 1 | -2.401918000 | -0.367791000 | -2.672513000 |
| 6 | -2.245076000 | -2.282220000 | -1.678765000 |
| 1 | -1.845877000 | -2.763117000 | -2.580228000 |
| 6 | -3.760611000 | -2.536618000 | -1.583200000 |
| 1 | -3.951644000 | -3.614671000 | -1.508502000 |
| 1 | -4.263686000 | -2.193905000 | -2.493153000 |
| 6 | -4.330762000 | -1.832156000 | -0.338222000 |
| 1 | -5.412782000 | -2.016675000 | -0.275065000 |
| 6 | -3.648144000 | -2.409364000 | 0.924866000  |
| 1 | -3.839634000 | -3.490205000 | 0.964379000  |
| 6 | -4.188320000 | -1.743719000 | 2.194446000  |
| 1 | -3.714094000 | -2.185689000 | 3.080255000  |
| 1 | -5.267789000 | -1.921321000 | 2.284800000  |
| 6 | -1.875833000 | -0.651139000 | 0.750784000  |
| 1 | -0.795420000 | -0.473206000 | 0.667217000  |
| 6 | -2.125846000 | -2.171855000 | 0.812743000  |
| 1 | -1.634965000 | -2.570785000 | 1.711260000  |
| 6 | -1.561725000 | -2.862859000 | -0.432967000 |
| 1 | -1.733429000 | -3.945318000 | -0.374968000 |
| 1 | -0.476948000 | -2.712563000 | -0.488379000 |

---

**MP5**

|   |              |              |              |
|---|--------------|--------------|--------------|
| 1 | -4.786364000 | -0.867724000 | 2.290596000  |
| 6 | -3.903815000 | 0.486814000  | -0.787674000 |
| 6 | -4.303462000 | 0.546503000  | 0.724365000  |
| 6 | -5.643247000 | 1.292140000  | 0.901771000  |
| 1 | -5.558136000 | 2.337659000  | 0.594333000  |
| 1 | -5.901140000 | 1.303018000  | 1.969493000  |
| 6 | -6.765468000 | 0.611735000  | 0.098671000  |
| 1 | -7.696633000 | 1.178194000  | 0.221727000  |
| 6 | -6.955531000 | -0.822047000 | 0.613119000  |
| 1 | -7.763127000 | -1.320745000 | 0.062039000  |
| 1 | -7.245984000 | -0.809615000 | 1.671457000  |
| 6 | -5.642465000 | -1.592687000 | 0.437956000  |
| 1 | -5.763393000 | -2.619224000 | 0.810472000  |
| 6 | -4.504928000 | -0.913284000 | 1.227931000  |
| 6 | -3.200242000 | -1.716351000 | 1.093687000  |
| 1 | -3.368806000 | -2.734617000 | 1.469888000  |
| 6 | -2.088806000 | -1.040950000 | 1.902377000  |
| 1 | -2.364493000 | -1.008527000 | 2.964304000  |
| 1 | -1.160141000 | -1.620330000 | 1.828838000  |
| 6 | -1.864591000 | 0.378743000  | 1.372299000  |
| 1 | -1.060418000 | 0.863258000  | 1.942685000  |
| 6 | -3.149400000 | 1.230417000  | 1.503206000  |
| 1 | -3.433117000 | 1.289311000  | 2.563709000  |
| 6 | -2.870017000 | 2.645511000  | 0.965425000  |
| 1 | -2.053534000 | 3.097785000  | 1.542676000  |
| 1 | -3.741311000 | 3.295104000  | 1.097197000  |
| 6 | -2.475239000 | 2.570829000  | -0.520967000 |
| 1 | -2.301521000 | 3.582580000  | -0.907171000 |

|   |              |              |              |
|---|--------------|--------------|--------------|
| 6 | -1.194820000 | 1.735535000  | -0.655195000 |
| 1 | -0.882432000 | 1.684715000  | -1.706294000 |
| 1 | -0.376662000 | 2.205819000  | -0.096923000 |
| 6 | -1.461881000 | 0.326416000  | -0.117505000 |
| 1 | -0.559319000 | -0.287926000 | -0.218409000 |
| 6 | -2.597740000 | -0.351324000 | -0.908381000 |
| 1 | -2.317256000 | -0.390229000 | -1.971600000 |
| 6 | -2.824514000 | -1.784891000 | -0.401238000 |
| 1 | -1.890735000 | -2.353474000 | -0.513047000 |
| 6 | -3.941184000 | -2.451179000 | -1.210720000 |
| 1 | -3.656080000 | -2.502851000 | -2.269472000 |
| 1 | -4.096303000 | -3.482426000 | -0.868285000 |
| 6 | -5.235529000 | -1.646572000 | -1.051413000 |
| 1 | -6.040589000 | -2.125729000 | -1.624783000 |
| 6 | -5.056570000 | -0.198426000 | -1.565764000 |
| 1 | -4.786690000 | -0.228267000 | -2.631156000 |
| 6 | -6.382377000 | 0.564273000  | -1.391708000 |
| 1 | -7.170730000 | 0.055669000  | -1.961005000 |
| 1 | -6.308949000 | 1.577488000  | -1.799902000 |
| 6 | -3.602639000 | 1.901866000  | -1.325711000 |
| 1 | -3.311394000 | 1.822012000  | -2.381868000 |
| 1 | -4.493918000 | 2.533890000  | -1.298235000 |
| 6 | 3.404514000  | 0.063391000  | 0.711763000  |
| 6 | 2.310399000  | 1.079214000  | 1.101701000  |
| 1 | 1.318774000  | 0.718743000  | 0.821404000  |
| 1 | 2.303252000  | 1.187024000  | 2.194987000  |
| 6 | 2.565337000  | 2.445388000  | 0.442689000  |
| 1 | 1.758078000  | 3.137105000  | 0.714380000  |
| 6 | 3.911942000  | 2.996806000  | 0.931580000  |
| 1 | 3.892987000  | 3.134350000  | 2.020332000  |
| 1 | 4.106324000  | 3.980148000  | 0.484619000  |
| 6 | 5.022781000  | 2.012868000  | 0.546180000  |
| 1 | 5.991697000  | 2.393335000  | 0.897830000  |
| 6 | 4.772556000  | 0.633279000  | 1.189122000  |
| 1 | 4.725540000  | 0.752016000  | 2.281964000  |
| 6 | 5.912208000  | -0.340030000 | 0.843394000  |
| 1 | 6.860789000  | 0.079872000  | 1.205015000  |
| 6 | 5.976090000  | -0.487457000 | -0.690918000 |
| 1 | 6.786171000  | -1.181739000 | -0.952943000 |
| 6 | 6.220310000  | 0.871251000  | -1.355042000 |
| 1 | 7.182586000  | 1.286229000  | -1.028368000 |
| 1 | 6.274925000  | 0.751010000  | -2.444755000 |
| 6 | 5.083948000  | 1.830598000  | -0.986874000 |
| 1 | 5.259220000  | 2.807983000  | -1.456384000 |
| 6 | 3.720101000  | 1.286092000  | -1.472443000 |
| 1 | 3.748901000  | 1.172889000  | -2.565685000 |
| 6 | 2.614615000  | 2.285104000  | -1.087805000 |
| 1 | 2.824789000  | 3.256027000  | -1.554159000 |
| 1 | 1.642399000  | 1.961174000  | -1.469422000 |
| 6 | 3.466324000  | -0.107604000 | -0.842868000 |

|   |             |              |              |
|---|-------------|--------------|--------------|
| 6 | 2.166610000 | -0.749999000 | -1.370318000 |
| 1 | 2.252597000 | -0.876097000 | -2.458181000 |
| 1 | 1.308602000 | -0.095753000 | -1.204489000 |
| 6 | 1.915265000 | -2.114638000 | -0.706143000 |
| 1 | 0.969425000 | -2.531175000 | -1.075213000 |
| 6 | 1.844461000 | -1.949917000 | 0.822941000  |
| 1 | 1.693506000 | -2.929927000 | 1.293422000  |
| 1 | 0.984049000 | -1.336109000 | 1.103820000  |
| 6 | 3.153058000 | -1.329750000 | 1.342783000  |
| 1 | 3.095140000 | -1.211146000 | 2.434267000  |
| 6 | 4.330972000 | -2.271759000 | 1.000412000  |
| 1 | 4.148072000 | -3.247780000 | 1.469879000  |
| 6 | 5.657968000 | -1.697070000 | 1.506839000  |
| 1 | 6.478023000 | -2.390612000 | 1.280126000  |
| 1 | 5.627138000 | -1.580741000 | 2.597916000  |
| 6 | 4.639668000 | -1.074440000 | -1.176220000 |
| 1 | 4.679215000 | -1.192528000 | -2.269389000 |
| 6 | 4.384937000 | -2.453368000 | -0.532899000 |
| 1 | 5.223613000 | -3.117668000 | -0.782871000 |
| 6 | 3.075204000 | -3.059295000 | -1.052322000 |
| 1 | 2.911093000 | -4.046347000 | -0.601367000 |
| 1 | 3.133451000 | -3.205513000 | -2.138499000 |

---

**MP6**


---

|   |             |              |              |
|---|-------------|--------------|--------------|
| 1 | 3.255902000 | -1.305965000 | 2.225091000  |
| 6 | 3.939865000 | 0.728966000  | -0.510665000 |
| 6 | 4.151718000 | 0.191381000  | 0.943740000  |
| 6 | 3.902963000 | 1.310637000  | 1.977375000  |
| 1 | 4.630764000 | 2.118814000  | 1.868595000  |
| 1 | 4.047048000 | 0.897347000  | 2.984898000  |
| 6 | 2.480006000 | 1.880951000  | 1.844159000  |
| 1 | 2.342161000 | 2.690967000  | 2.570718000  |
| 6 | 1.463059000 | 0.762753000  | 2.111214000  |
| 1 | 0.439702000 | 1.151269000  | 2.042228000  |
| 1 | 1.589177000 | 0.370212000  | 3.128360000  |
| 6 | 1.676490000 | -0.357205000 | 1.087902000  |
| 1 | 0.957858000 | -1.167378000 | 1.270445000  |
| 6 | 3.103425000 | -0.930906000 | 1.202081000  |
| 6 | 3.298368000 | -2.091808000 | 0.212809000  |
| 1 | 2.555641000 | -2.871857000 | 0.429441000  |
| 6 | 4.711928000 | -2.664230000 | 0.355288000  |
| 1 | 4.857820000 | -3.051787000 | 1.371860000  |
| 1 | 4.852550000 | -3.507013000 | -0.333758000 |
| 6 | 5.738323000 | -1.566889000 | 0.056165000  |
| 1 | 6.753486000 | -1.975553000 | 0.150463000  |
| 6 | 5.588845000 | -0.382667000 | 1.040726000  |
| 1 | 5.748764000 | -0.747642000 | 2.065419000  |
| 6 | 6.644449000 | 0.686228000  | 0.704409000  |
| 1 | 7.646103000 | 0.246535000  | 0.791682000  |
| 1 | 6.605372000 | 1.514914000  | 1.418789000  |

|   |              |              |              |
|---|--------------|--------------|--------------|
| 6 | 6.426290000  | 1.202326000  | -0.729638000 |
| 1 | 7.163888000  | 1.981744000  | -0.956698000 |
| 6 | 6.583083000  | 0.034084000  | -1.713010000 |
| 1 | 6.447469000  | 0.385622000  | -2.743859000 |
| 1 | 7.594137000  | -0.387617000 | -1.645697000 |
| 6 | 5.540443000  | -1.039392000 | -1.382466000 |
| 1 | 5.637669000  | -1.878487000 | -2.085040000 |
| 6 | 4.113517000  | -0.463929000 | -1.496800000 |
| 1 | 3.963323000  | -0.082146000 | -2.517707000 |
| 6 | 3.067356000  | -1.555844000 | -1.215413000 |
| 1 | 3.204997000  | -2.374651000 | -1.934663000 |
| 6 | 1.656869000  | -0.974189000 | -1.352537000 |
| 1 | 1.497022000  | -0.610381000 | -2.375764000 |
| 1 | 0.906072000  | -1.752865000 | -1.166386000 |
| 6 | 1.481328000  | 0.170146000  | -0.350790000 |
| 1 | 0.473811000  | 0.591204000  | -0.447423000 |
| 6 | 2.502827000  | 1.301074000  | -0.607773000 |
| 1 | 2.351802000  | 1.694151000  | -1.623395000 |
| 6 | 2.270522000  | 2.424524000  | 0.418802000  |
| 1 | 1.246604000  | 2.805145000  | 0.313394000  |
| 1 | 2.937906000  | 3.271949000  | 0.231481000  |
| 6 | 5.008840000  | 1.785648000  | -0.860772000 |
| 1 | 4.839432000  | 2.129321000  | -1.890279000 |
| 1 | 4.917204000  | 2.667932000  | -0.222094000 |
| 6 | -3.322529000 | 0.027158000  | 0.633697000  |
| 6 | -2.046472000 | -0.712604000 | 1.083692000  |
| 1 | -1.155728000 | -0.255685000 | 0.652461000  |
| 1 | -1.946857000 | -0.616294000 | 2.173512000  |
| 6 | -2.099169000 | -2.198337000 | 0.690962000  |
| 1 | -1.167236000 | -2.689367000 | 0.998382000  |
| 6 | -3.295184000 | -2.860647000 | 1.389099000  |
| 1 | -3.182147000 | -2.794106000 | 2.478785000  |
| 1 | -3.344182000 | -3.926858000 | 1.133414000  |
| 6 | -4.582915000 | -2.153157000 | 0.950607000  |
| 1 | -5.446246000 | -2.613952000 | 1.450106000  |
| 6 | -4.536534000 | -0.657481000 | 1.326497000  |
| 1 | -4.399057000 | -0.566936000 | 2.414385000  |
| 6 | -5.847791000 | 0.042030000  | 0.930923000  |
| 1 | -6.683947000 | -0.451036000 | 1.445343000  |
| 6 | -6.034441000 | -0.103697000 | -0.593473000 |
| 1 | -6.968202000 | 0.392476000  | -0.891464000 |
| 6 | -6.080077000 | -1.581718000 | -0.994245000 |
| 1 | -6.932101000 | -2.079702000 | -0.513675000 |
| 1 | -6.224743000 | -1.671255000 | -2.078672000 |
| 6 | -4.772605000 | -2.264008000 | -0.578599000 |
| 1 | -4.804972000 | -3.325576000 | -0.858806000 |
| 6 | -3.558391000 | -1.605478000 | -1.274814000 |
| 1 | -3.676603000 | -1.698952000 | -2.363876000 |
| 6 | -2.272231000 | -2.326901000 | -0.833136000 |
| 1 | -2.336775000 | -3.386693000 | -1.110625000 |

|   |              |              |              |
|---|--------------|--------------|--------------|
| 1 | -1.398095000 | -1.922402000 | -1.352807000 |
| 6 | -3.511779000 | -0.098199000 | -0.914835000 |
| 6 | -2.380536000 | 0.637863000  | -1.662685000 |
| 1 | -2.555847000 | 0.546180000  | -2.743220000 |
| 1 | -1.411036000 | 0.173787000  | -1.469078000 |
| 6 | -2.331014000 | 2.123469000  | -1.266369000 |
| 1 | -1.499209000 | 2.612541000  | -1.788281000 |
| 6 | -2.132998000 | 2.252844000  | 0.254768000  |
| 1 | -2.127004000 | 3.313062000  | 0.538249000  |
| 1 | -1.160300000 | 1.848793000  | 0.549232000  |
| 6 | -3.275421000 | 1.534204000  | 0.994253000  |
| 1 | -3.126231000 | 1.627069000  | 2.079591000  |
| 6 | -4.619321000 | 2.197644000  | 0.611550000  |
| 1 | -4.579183000 | 3.259151000  | 0.890949000  |
| 6 | -5.790360000 | 1.519925000  | 1.330390000  |
| 1 | -6.731377000 | 2.021160000  | 1.069331000  |
| 1 | -5.668926000 | 1.609346000  | 2.417672000  |
| 6 | -4.854974000 | 0.591370000  | -1.294173000 |
| 1 | -4.984956000 | 0.501113000  | -2.382988000 |
| 6 | -4.804225000 | 2.086972000  | -0.918442000 |
| 1 | -5.761077000 | 2.550743000  | -1.195076000 |
| 6 | -3.658174000 | 2.790246000  | -1.655129000 |
| 1 | -3.639871000 | 3.856402000  | -1.395189000 |
| 1 | -3.812029000 | 2.724264000  | -2.739827000 |
