# Supplementary material for: Assigning the absolute configuration of single aliphatic molecules by visual inspection
Source: PubMed Central journal article supplement (PMC6010418; doi:10.1038/s41467-018-04843-z), 2018-06-20
Supplement: 41467_2018_4843_MOESM4_ESM.pdf [file 41467_2018_4843_MOESM4_ESM.pdf]

## Supplementary Data 2

### Assigning the absolute configuration of single aliphatic molecules by visual inspection

*Daniel Ebeling,<sup>1,‡,\*</sup> Marina Šekutor,<sup>2,‡,\*</sup> Marvin Stiefermann,<sup>1</sup> Jalmar Tschakert,<sup>1</sup> Jeremy E. P. Dahl,<sup>3</sup> Robert M. K. Carlson,<sup>3</sup> André Schirmeisen,<sup>1,\*</sup> and Peter R. Schreiner<sup>2,\*</sup>*

<sup>1</sup>Institute of Applied Physics, Justus-Liebig University, Heinrich-Buff-Ring 16, 35392 Giessen, Germany,  
[Daniel.Ebeling@ap.physik.uni-giessen.de](mailto:Daniel.Ebeling@ap.physik.uni-giessen.de), [Andre.Schirmeisen@ap.physik.uni-giessen.de](mailto:Andre.Schirmeisen@ap.physik.uni-giessen.de)

<sup>2</sup>Institute of Organic Chemistry, Justus-Liebig University, Heinrich-Buff-Ring 17, 35392 Giessen, Germany, [Marina.Sekutor@org.Chemie.uni-giessen.de](mailto:Marina.Sekutor@org.Chemie.uni-giessen.de), [prs@uni-giessen.de](mailto:prs@uni-giessen.de)

<sup>3</sup>Stanford Institute for Materials and Energy Sciences, Stanford, CA 94305, USA

<sup>‡</sup>Both contributors are considered first authors.

**Supplementary Data Set 2.** Geometries in Cartesian coordinates in Å computed at the M06-2X/6-31G(d,p) level of theory.

| <b>1</b> |              |              |              |
|----------|--------------|--------------|--------------|
| 1        | 1.341271000  | 2.079023000  | 0.808134000  |
| 6        | -0.596200000 | -0.503725000 | -0.472795000 |
| 6        | 0.596200000  | 0.503725000  | -0.472795000 |
| 6        | 0.502701000  | 1.452063000  | -1.684160000 |
| 1        | 0.596509000  | 0.903670000  | -2.626419000 |
| 1        | 1.347472000  | 2.154559000  | -1.645134000 |
| 6        | -0.823208000 | 2.227657000  | -1.676570000 |
| 1        | -0.873227000 | 2.872673000  | -2.561622000 |
| 6        | -0.900804000 | 3.081236000  | -0.406656000 |
| 1        | -1.837427000 | 3.652991000  | -0.389986000 |
| 1        | -0.075438000 | 3.804262000  | -0.386194000 |
| 6        | -0.823208000 | 2.163431000  | 0.815127000  |
| 1        | -0.870831000 | 2.763382000  | 1.735016000  |
| 6        | 0.497211000  | 1.370432000  | 0.813469000  |
| 6        | 0.595395000  | 0.488413000  | 2.067068000  |
| 1        | 0.535510000  | 1.129182000  | 2.958079000  |
| 6        | 1.920697000  | -0.275593000 | 2.062180000  |
| 1        | 2.759793000  | 0.431896000  | 2.072671000  |
| 1        | 2.005141000  | -0.894734000 | 2.964540000  |
| 6        | 1.993226000  | -1.158905000 | 0.815163000  |
| 1        | 2.940953000  | -1.715359000 | 0.809725000  |
| 6        | 1.913944000  | -0.308319000 | -0.471315000 |
| 1        | 2.757086000  | 0.399034000  | -0.485051000 |
| 6        | 2.000798000  | -1.240135000 | -1.690751000 |
| 1        | 2.947150000  | -1.794789000 | -1.653800000 |
| 1        | 2.009431000  | -0.668098000 | -2.624527000 |
| 6        | 0.823208000  | -2.227657000 | -1.676570000 |
| 1        | 0.873227000  | -2.872673000 | -2.561622000 |
| 6        | 0.900804000  | -3.081236000 | -0.406656000 |
| 1        | 0.075438000  | -3.804262000 | -0.386194000 |
| 1        | 1.837427000  | -3.652991000 | -0.389986000 |
| 6        | 0.823208000  | -2.163431000 | 0.815127000  |
| 1        | 0.870831000  | -2.763382000 | 1.735016000  |
| 6        | -0.497211000 | -1.370432000 | 0.813469000  |
| 1        | -1.341271000 | -2.079023000 | 0.808134000  |
| 6        | -0.595395000 | -0.488413000 | 2.067068000  |
| 1        | -0.535510000 | -1.129182000 | 2.958079000  |
| 6        | -1.920697000 | 0.275593000  | 2.062180000  |
| 1        | -2.759793000 | -0.431896000 | 2.072671000  |
| 1        | -2.005141000 | 0.894734000  | 2.964540000  |
| 6        | -1.993226000 | 1.158905000  | 0.815163000  |
| 1        | -2.940953000 | 1.715359000  | 0.809725000  |
| 6        | -1.913944000 | 0.308319000  | -0.471315000 |
| 1        | -2.757086000 | -0.399034000 | -0.485051000 |
| 6        | -2.000798000 | 1.240135000  | -1.690751000 |
| 1        | -2.947150000 | 1.794789000  | -1.653800000 |

|   |              |              |              |
|---|--------------|--------------|--------------|
| 1 | -2.009431000 | 0.668098000  | -2.624527000 |
| 6 | -0.502701000 | -1.452063000 | -1.684160000 |
| 1 | -1.347472000 | -2.154559000 | -1.645134000 |
| 1 | -0.596509000 | -0.903670000 | -2.626419000 |

---

**2**

---

|   |              |              |              |
|---|--------------|--------------|--------------|
| 6 | 0.078340000  | -0.472619000 | -0.776489000 |
| 6 | 0.913425000  | -1.683800000 | -1.235810000 |
| 1 | 0.408246000  | -2.626262000 | -1.003820000 |
| 1 | 1.015937000  | -1.644120000 | -2.329678000 |
| 6 | 2.302446000  | -1.676527000 | -0.580086000 |
| 1 | 2.862815000  | -2.561557000 | -0.903451000 |
| 6 | 3.050693000  | -0.406582000 | -0.998130000 |
| 1 | 3.180489000  | -0.385714000 | -2.087699000 |
| 1 | 4.051889000  | -0.390321000 | -0.548900000 |
| 6 | 2.249827000  | 0.815179000  | -0.542920000 |
| 1 | 2.771733000  | 1.735074000  | -0.842715000 |
| 6 | 0.849493000  | 0.813594000  | -1.184487000 |
| 1 | 0.957601000  | 0.808279000  | -2.281229000 |
| 6 | 0.066305000  | 2.067078000  | -0.767219000 |
| 1 | 0.628651000  | 2.958181000  | -1.079890000 |
| 6 | -0.066305000 | 2.067078000  | 0.767219000  |
| 1 | -0.628651000 | 2.958181000  | 1.079890000  |
| 6 | 1.312937000  | 2.062002000  | 1.429252000  |
| 1 | 1.871611000  | 2.964343000  | 1.149291000  |
| 1 | 1.202872000  | 2.072301000  | 2.521281000  |
| 6 | 2.082792000  | 0.814993000  | 0.989969000  |
| 1 | 3.077573000  | 0.809571000  | 1.457101000  |
| 6 | 1.336190000  | -0.471451000 | 1.405011000  |
| 1 | 1.228715000  | -0.485449000 | 2.500302000  |
| 6 | 2.153630000  | -1.691028000 | 0.949501000  |
| 1 | 3.146192000  | -1.654600000 | 1.416495000  |
| 1 | 1.686417000  | -2.624764000 | 1.279799000  |
| 6 | -0.078340000 | -0.472619000 | 0.776489000  |
| 6 | -0.913425000 | -1.683800000 | 1.235810000  |
| 1 | -1.015937000 | -1.644119000 | 2.329678000  |
| 1 | -0.408246000 | -2.626262000 | 1.003820000  |
| 6 | -2.302446000 | -1.676527000 | 0.580086000  |
| 1 | -2.862815000 | -2.561557000 | 0.903451000  |
| 6 | -2.153630000 | -1.691028000 | -0.949501000 |
| 1 | -3.146192000 | -1.654600000 | -1.416495000 |
| 1 | -1.686417000 | -2.624764000 | -1.279799000 |
| 6 | -1.336190000 | -0.471451000 | -1.405011000 |
| 1 | -1.228715000 | -0.485449000 | -2.500302000 |
| 6 | -2.082792000 | 0.814993000  | -0.989969000 |
| 1 | -3.077573000 | 0.809571000  | -1.457101000 |
| 6 | -1.312937000 | 2.062002000  | -1.429252000 |
| 1 | -1.871611000 | 2.964343000  | -1.149291000 |
| 1 | -1.202872000 | 2.072301000  | -2.521281000 |
| 6 | -0.849493000 | 0.813594000  | 1.184487000  |

|   |              |              |             |
|---|--------------|--------------|-------------|
| 1 | -0.957601000 | 0.808279000  | 2.281229000 |
| 6 | -2.249827000 | 0.815179000  | 0.542920000 |
| 1 | -2.771733000 | 1.735074000  | 0.842715000 |
| 6 | -3.050693000 | -0.406582000 | 0.998130000 |
| 1 | -4.051889000 | -0.390320000 | 0.548900000 |
| 1 | -3.180489000 | -0.385714000 | 2.087699000 |

---

**M1**

|   |              |             |              |
|---|--------------|-------------|--------------|
| 1 | 0.163558000  | 4.452265000 | -2.457248000 |
| 6 | -0.248669000 | 3.156888000 | 0.738701000  |
| 6 | 0.189511000  | 3.114037000 | -0.758688000 |
| 6 | -0.600937000 | 2.035198000 | -1.522351000 |
| 1 | -0.374746000 | 1.036325000 | -1.137293000 |
| 1 | -0.281155000 | 2.042451000 | -2.574209000 |
| 6 | -2.112885000 | 2.289599000 | -1.433236000 |
| 1 | -2.648811000 | 1.489848000 | -1.958966000 |
| 6 | -2.429245000 | 3.643665000 | -2.078185000 |
| 1 | -3.507967000 | 3.841244000 | -2.037076000 |
| 1 | -2.137866000 | 3.635812000 | -3.136200000 |
| 6 | -1.665598000 | 4.741509000 | -1.332929000 |
| 1 | -1.878510000 | 5.718217000 | -1.790227000 |
| 6 | -0.147445000 | 4.488128000 | -1.400598000 |
| 6 | 0.620383000  | 5.614684000 | -0.693167000 |
| 1 | 0.373961000  | 6.570923000 | -1.175751000 |
| 6 | 2.125474000  | 5.355647000 | -0.787029000 |
| 1 | 2.436098000  | 5.335729000 | -1.839553000 |
| 1 | 2.680864000  | 6.166577000 | -0.298524000 |
| 6 | 2.455795000  | 4.020520000 | -0.116154000 |
| 1 | 3.537163000  | 3.833646000 | -0.175074000 |
| 6 | 1.715197000  | 2.856053000 | -0.808856000 |
| 1 | 2.024601000  | 2.811433000 | -1.864071000 |
| 6 | 2.085768000  | 1.539493000 | -0.105616000 |
| 1 | 3.171893000  | 1.389006000 | -0.163948000 |
| 1 | 1.626885000  | 0.680650000 | -0.610043000 |
| 6 | 1.649064000  | 1.595818000 | 1.366888000  |
| 1 | 1.888891000  | 0.645686000 | 1.861829000  |
| 6 | 2.387481000  | 2.743764000 | 2.063680000  |
| 1 | 2.100060000  | 2.790768000 | 3.121735000  |
| 1 | 3.471285000  | 2.575652000 | 2.025889000  |
| 6 | 2.034231000  | 4.059784000 | 1.366505000  |
| 1 | 2.553208000  | 4.893189000 | 1.860924000  |
| 6 | 0.516929000  | 4.316131000 | 1.433726000  |
| 1 | 0.204125000  | 4.341558000 | 2.490154000  |
| 6 | 0.167656000  | 5.660519000 | 0.777999000  |
| 1 | 0.711977000  | 6.461631000 | 1.297616000  |
| 6 | -1.339228000 | 5.908151000 | 0.871391000  |
| 1 | -1.646210000 | 5.949657000 | 1.924359000  |
| 1 | -1.593095000 | 6.875640000 | 0.419458000  |
| 6 | -2.085768000 | 4.783908000 | 0.150124000  |
| 1 | -3.168797000 | 4.960850000 | 0.209199000  |

|   |              |              |              |
|---|--------------|--------------|--------------|
| 6 | -1.773863000 | 3.413861000  | 0.790413000  |
| 1 | -2.086145000 | 3.432171000  | 1.845655000  |
| 6 | -2.551965000 | 2.321579000  | 0.039304000  |
| 1 | -3.626240000 | 2.538739000  | 0.097600000  |
| 1 | -2.406062000 | 1.340070000  | 0.504710000  |
| 6 | 0.135506000  | 1.844638000  | 1.446847000  |
| 1 | -0.180992000 | 1.902586000  | 2.498574000  |
| 1 | -0.397638000 | 0.995408000  | 1.007861000  |
| 1 | -0.163558000 | -4.452265000 | -2.457248000 |
| 6 | 0.248669000  | -3.156888000 | 0.738701000  |
| 6 | -0.189511000 | -3.114037000 | -0.758688000 |
| 6 | 0.600937000  | -2.035198000 | -1.522351000 |
| 1 | 0.374746000  | -1.036325000 | -1.137293000 |
| 1 | 0.281155000  | -2.042451000 | -2.574209000 |
| 6 | 2.112885000  | -2.289599000 | -1.433236000 |
| 1 | 2.648811000  | -1.489848000 | -1.958966000 |
| 6 | 2.429245000  | -3.643665000 | -2.078185000 |
| 1 | 3.507967000  | -3.841244000 | -2.037076000 |
| 1 | 2.137866000  | -3.635812000 | -3.136200000 |
| 6 | 1.665598000  | -4.741509000 | -1.332929000 |
| 1 | 1.878510000  | -5.718217000 | -1.790227000 |
| 6 | 0.147445000  | -4.488128000 | -1.400598000 |
| 6 | -0.620383000 | -5.614684000 | -0.693167000 |
| 1 | -0.373961000 | -6.570923000 | -1.175751000 |
| 6 | -2.125474000 | -5.355647000 | -0.787029000 |
| 1 | -2.436098000 | -5.335729000 | -1.839553000 |
| 1 | -2.680864000 | -6.166577000 | -0.298524000 |
| 6 | -2.455795000 | -4.020520000 | -0.116154000 |
| 1 | -3.537163000 | -3.833646000 | -0.175074000 |
| 6 | -1.715197000 | -2.856053000 | -0.808856000 |
| 1 | -2.024601000 | -2.811433000 | -1.864071000 |
| 6 | -2.085768000 | -1.539493000 | -0.105616000 |
| 1 | -3.171893000 | -1.389006000 | -0.163948000 |
| 1 | -1.626885000 | -0.680650000 | -0.610043000 |
| 6 | -1.649064000 | -1.595818000 | 1.366888000  |
| 1 | -1.888891000 | -0.645686000 | 1.861829000  |
| 6 | -2.387481000 | -2.743764000 | 2.063680000  |
| 1 | -2.100060000 | -2.790768000 | 3.121735000  |
| 1 | -3.471285000 | -2.575652000 | 2.025889000  |
| 6 | -2.034231000 | -4.059784000 | 1.366505000  |
| 1 | -2.553208000 | -4.893189000 | 1.860924000  |
| 6 | -0.516929000 | -4.316131000 | 1.433726000  |
| 1 | -0.204125000 | -4.341558000 | 2.490154000  |
| 6 | -0.167656000 | -5.660519000 | 0.777999000  |
| 1 | -0.711977000 | -6.461631000 | 1.297616000  |
| 6 | 1.339228000  | -5.908151000 | 0.871391000  |
| 1 | 1.646210000  | -5.949657000 | 1.924359000  |
| 1 | 1.593095000  | -6.875640000 | 0.419458000  |
| 6 | 2.085768000  | -4.783908000 | 0.150124000  |
| 1 | 3.168797000  | -4.960850000 | 0.209199000  |

|   |              |              |             |
|---|--------------|--------------|-------------|
| 6 | 1.773863000  | -3.413861000 | 0.790413000 |
| 1 | 2.086145000  | -3.432171000 | 1.845655000 |
| 6 | 2.551965000  | -2.321579000 | 0.039304000 |
| 1 | 3.626240000  | -2.538739000 | 0.097600000 |
| 1 | 2.406062000  | -1.340070000 | 0.504710000 |
| 6 | -0.135506000 | -1.844638000 | 1.446847000 |
| 1 | 0.180992000  | -1.902586000 | 2.498574000 |
| 1 | 0.397638000  | -0.995408000 | 1.007861000 |

---

**M2**

|   |             |              |              |
|---|-------------|--------------|--------------|
| 1 | 5.596533000 | -1.046733000 | -0.747025000 |
| 6 | 2.597472000 | 0.237768000  | 0.441589000  |
| 6 | 4.142684000 | 0.226716000  | 0.223580000  |
| 6 | 4.879150000 | 0.136808000  | 1.574332000  |
| 1 | 4.689078000 | 1.020640000  | 2.190740000  |
| 1 | 5.961463000 | 0.115307000  | 1.382540000  |
| 6 | 4.460384000 | -1.122694000 | 2.347731000  |
| 1 | 4.978273000 | -1.146372000 | 3.313688000  |
| 6 | 4.830877000 | -2.363610000 | 1.529182000  |
| 1 | 4.550620000 | -3.274830000 | 2.072860000  |
| 1 | 5.915731000 | -2.399688000 | 1.367190000  |
| 6 | 4.102540000 | -2.308540000 | 0.184783000  |
| 1 | 4.365114000 | -3.190086000 | -0.417121000 |
| 6 | 4.504747000 | -1.042772000 | -0.596651000 |
| 6 | 3.813711000 | -1.014729000 | -1.968252000 |
| 1 | 4.099922000 | -1.915642000 | -2.529023000 |
| 6 | 4.238561000 | 0.236602000  | -2.739104000 |
| 1 | 5.324188000 | 0.225167000  | -2.900586000 |
| 1 | 3.762015000 | 0.253101000  | -3.727687000 |
| 6 | 3.838166000 | 1.482580000  | -1.946447000 |
| 1 | 4.134687000 | 2.384941000  | -2.499281000 |
| 6 | 4.526203000 | 1.503347000  | -0.563653000 |
| 1 | 5.617425000 | 1.506971000  | -0.707473000 |
| 6 | 4.099636000 | 2.775783000  | 0.186916000  |
| 1 | 4.391394000 | 3.655624000  | -0.400699000 |
| 1 | 4.615110000 | 2.857358000  | 1.149679000  |
| 6 | 2.576111000 | 2.773765000  | 0.391568000  |
| 1 | 2.277149000 | 3.668922000  | 0.949930000  |
| 6 | 1.889336000 | 2.762991000  | -0.977800000 |
| 1 | 0.798266000 | 2.781793000  | -0.854974000 |
| 1 | 2.167445000 | 3.658123000  | -1.548707000 |
| 6 | 2.310240000 | 1.503194000  | -1.737004000 |
| 1 | 1.814978000 | 1.477063000  | -2.718331000 |
| 6 | 1.912944000 | 0.238745000  | -0.952960000 |
| 1 | 0.822359000 | 0.244062000  | -0.791503000 |
| 6 | 2.290246000 | -1.023286000 | -1.742529000 |
| 1 | 1.779448000 | -0.998795000 | -2.715794000 |
| 6 | 1.868381000 | -2.270206000 | -0.963879000 |
| 1 | 0.778967000 | -2.272716000 | -0.825933000 |
| 1 | 2.125353000 | -3.175542000 | -1.528824000 |

|   |              |              |              |
|---|--------------|--------------|--------------|
| 6 | 2.574236000  | -2.286153000 | 0.393571000  |
| 1 | 2.276185000  | -3.182555000 | 0.955718000  |
| 6 | 2.210198000  | -1.037971000 | 1.226962000  |
| 1 | 1.121823000  | -1.022299000 | 1.397136000  |
| 6 | 2.940787000  | -1.108998000 | 2.577491000  |
| 1 | 2.639176000  | -2.024356000 | 3.102576000  |
| 1 | 2.658342000  | -0.270564000 | 3.222784000  |
| 6 | 2.164593000  | 1.520281000  | 1.177869000  |
| 1 | 1.072344000  | 1.497746000  | 1.307525000  |
| 1 | 2.594868000  | 1.566228000  | 2.182880000  |
| 1 | -0.818452000 | 0.241782000  | 0.778452000  |
| 6 | -4.143968000 | 0.229072000  | -0.218648000 |
| 6 | -2.599969000 | 0.239312000  | -0.444980000 |
| 6 | -2.169735000 | 1.523009000  | -1.180799000 |
| 1 | -2.604643000 | 1.571280000  | -2.183703000 |
| 1 | -1.078048000 | 1.499989000  | -1.315429000 |
| 6 | -2.576526000 | 2.775245000  | -0.390009000 |
| 1 | -2.279913000 | 3.671287000  | -0.948196000 |
| 6 | -1.882594000 | 2.761407000  | 0.975682000  |
| 1 | -2.157346000 | 3.655457000  | 1.549903000  |
| 1 | -0.792209000 | 2.780090000  | 0.847144000  |
| 6 | -2.300114000 | 1.500246000  | 1.734563000  |
| 1 | -1.799463000 | 1.471727000  | 2.713098000  |
| 6 | -1.908091000 | 0.236998000  | 0.945828000  |
| 6 | -2.282082000 | -1.026337000 | 1.734927000  |
| 1 | -1.765896000 | -1.004233000 | 2.705419000  |
| 6 | -1.865635000 | -2.272154000 | 0.951532000  |
| 1 | -0.777001000 | -2.275634000 | 0.807729000  |
| 1 | -2.120560000 | -3.178323000 | 1.516075000  |
| 6 | -2.578738000 | -2.284753000 | -0.402141000 |
| 1 | -2.284497000 | -3.180280000 | -0.967668000 |
| 6 | -2.217978000 | -1.035213000 | -1.234956000 |
| 1 | -1.130447000 | -1.020214000 | -1.410772000 |
| 6 | -2.955893000 | -1.102909000 | -2.581682000 |
| 1 | -2.657898000 | -2.017443000 | -3.110249000 |
| 1 | -2.676285000 | -0.263399000 | -3.226814000 |
| 6 | -4.474245000 | -1.115785000 | -2.343741000 |
| 1 | -4.997332000 | -1.137053000 | -3.306952000 |
| 6 | -4.841500000 | -2.357990000 | -1.525679000 |
| 1 | -5.925503000 | -2.393376000 | -1.357954000 |
| 1 | -4.564999000 | -3.268381000 | -2.072655000 |
| 6 | -4.105880000 | -2.306252000 | -0.185112000 |
| 1 | -4.365938000 | -3.188789000 | 0.416426000  |
| 6 | -4.502710000 | -1.041718000 | 0.601032000  |
| 1 | -5.593674000 | -1.044988000 | 0.757276000  |
| 6 | -3.804287000 | -1.016991000 | 1.968964000  |
| 1 | -4.088226000 | -1.918802000 | 2.529448000  |
| 6 | -4.223965000 | 0.233125000  | 2.744593000  |
| 1 | -5.308705000 | 0.222191000  | 2.911962000  |
| 1 | -3.742028000 | 0.247279000  | 3.730595000  |

|   |              |             |              |
|---|--------------|-------------|--------------|
| 6 | -3.826894000 | 1.480372000 | 1.952256000  |
| 1 | -4.119767000 | 2.381851000 | 2.508456000  |
| 6 | -4.522305000 | 1.504376000 | 0.573211000  |
| 1 | -5.612740000 | 1.508453000 | 0.722889000  |
| 6 | -4.098917000 | 2.777936000 | -0.177210000 |
| 1 | -4.386849000 | 3.656866000 | 0.413650000  |
| 1 | -4.619539000 | 2.861722000 | -1.137006000 |
| 6 | -4.887714000 | 0.142545000 | -1.565599000 |
| 1 | -5.969014000 | 0.121673000 | -1.368101000 |
| 1 | -4.700065000 | 1.027419000 | -2.181259000 |

---

**M3**


---

|   |              |              |              |
|---|--------------|--------------|--------------|
| 1 | -3.274066000 | -0.338465000 | -2.495027000 |
| 6 | -4.336544000 | 0.408057000  | 0.726286000  |
| 6 | -4.432373000 | 0.415631000  | -0.831668000 |
| 6 | -4.375279000 | 1.858686000  | -1.370002000 |
| 1 | -5.236492000 | 2.443525000  | -1.032905000 |
| 1 | -4.429283000 | 1.825533000  | -2.467549000 |
| 6 | -3.080762000 | 2.560751000  | -0.931585000 |
| 1 | -3.080493000 | 3.591179000  | -1.305761000 |
| 6 | -1.877372000 | 1.801649000  | -1.500385000 |
| 1 | -0.943247000 | 2.297916000  | -1.201980000 |
| 1 | -1.911892000 | 1.801909000  | -2.597266000 |
| 6 | -1.901914000 | 0.365125000  | -0.974182000 |
| 1 | -1.049155000 | -0.197750000 | -1.381787000 |
| 6 | -3.200909000 | -0.345904000 | -1.395429000 |
| 6 | -3.195241000 | -1.801809000 | -0.906721000 |
| 1 | -2.320405000 | -2.315066000 | -1.330889000 |
| 6 | -4.480268000 | -2.502443000 | -1.352136000 |
| 1 | -4.542103000 | -2.507068000 | -2.447971000 |
| 1 | -4.476577000 | -3.548974000 | -1.021349000 |
| 6 | -5.688234000 | -1.773065000 | -0.760027000 |
| 1 | -6.614231000 | -2.276437000 | -1.071444000 |
| 6 | -5.739813000 | -0.305668000 | -1.238765000 |
| 1 | -5.817083000 | -0.289870000 | -2.336575000 |
| 6 | -6.972102000 | 0.376907000  | -0.623467000 |
| 1 | -7.876188000 | -0.161044000 | -0.936247000 |
| 1 | -7.077076000 | 1.404110000  | -0.988324000 |
| 6 | -6.865948000 | 0.359597000  | 0.909636000  |
| 1 | -7.733157000 | 0.870386000  | 1.344270000  |
| 6 | -6.823988000 | -1.094015000 | 1.392015000  |
| 1 | -6.764016000 | -1.127223000 | 2.487336000  |
| 1 | -7.742522000 | -1.618043000 | 1.098467000  |
| 6 | -5.604751000 | -1.786609000 | 0.779688000  |
| 1 | -5.557630000 | -2.829731000 | 1.123314000  |
| 6 | -4.307873000 | -1.071149000 | 1.202152000  |
| 1 | -4.241136000 | -1.070021000 | 2.302189000  |
| 6 | -3.082166000 | -1.798442000 | 0.629515000  |
| 1 | -3.082142000 | -2.835647000 | 0.993010000  |
| 6 | -1.802618000 | -1.088443000 | 1.076623000  |



|   |              |              |              |
|---|--------------|--------------|--------------|
| 1 | -1.730596000 | -1.099299000 | 2.172185000  |
| 1 | -0.920629000 | -1.615846000 | 0.688946000  |
| 6 | -1.817744000 | 0.352817000  | 0.565141000  |
| 1 | -0.896803000 | 0.867420000  | 0.874918000  |
| 6 | -3.027326000 | 1.126704000  | 1.133025000  |
| 1 | -2.962809000 | 1.134381000  | 2.231716000  |
| 6 | -2.988805000 | 2.568494000  | 0.602527000  |
| 1 | -2.047615000 | 3.041189000  | 0.912874000  |
| 1 | -3.797581000 | 3.169263000  | 1.031758000  |
| 6 | -5.579245000 | 1.075061000  | 1.347750000  |
| 1 | -5.485372000 | 1.039327000  | 2.442528000  |
| 1 | -5.641372000 | 2.132759000  | 1.074388000  |
| 1 | 4.241129000  | -1.070025000 | -2.302188000 |
| 6 | 4.432376000  | 0.415632000  | 0.831667000  |
| 6 | 4.336542000  | 0.408055000  | -0.726287000 |
| 6 | 5.579241000  | 1.075059000  | -1.347756000 |
| 1 | 5.641368000  | 2.132757000  | -1.074396000 |
| 1 | 5.485364000  | 1.039324000  | -2.442534000 |
| 6 | 6.865944000  | 0.359596000  | -0.909645000 |
| 1 | 7.733152000  | 0.870385000  | -1.344282000 |
| 6 | 6.823984000  | -1.094017000 | -1.392022000 |
| 1 | 7.742519000  | -1.618044000 | -1.098476000 |
| 1 | 6.764008000  | -1.127226000 | -2.487342000 |
| 6 | 5.604749000  | -1.786610000 | -0.779690000 |
| 1 | 5.557627000  | -2.829732000 | -1.123314000 |
| 6 | 4.307869000  | -1.071151000 | -1.202150000 |
| 6 | 3.082164000  | -1.798444000 | -0.629509000 |
| 1 | 3.082140000  | -2.835649000 | -0.993002000 |
| 6 | 1.802615000  | -1.088446000 | -1.076614000 |
| 1 | 1.730589000  | -1.099303000 | -2.172176000 |
| 1 | 0.920627000  | -1.615848000 | -0.688934000 |
| 6 | 1.817742000  | 0.352815000  | -0.565135000 |
| 1 | 0.896800000  | 0.867418000  | -0.874910000 |
| 6 | 3.027322000  | 1.126702000  | -1.133023000 |
| 1 | 2.962801000  | 1.134377000  | -2.231714000 |
| 6 | 2.988802000  | 2.568493000  | -0.602527000 |
| 1 | 2.047611000  | 3.041187000  | -0.912873000 |
| 1 | 3.797577000  | 3.169261000  | -1.031762000 |
| 6 | 3.080764000  | 2.560753000  | 0.931585000  |
| 1 | 3.080496000  | 3.591180000  | 1.305759000  |
| 6 | 1.877375000  | 1.801650000  | 1.500389000  |
| 1 | 1.911899000  | 1.801912000  | 2.597270000  |
| 1 | 0.943250000  | 2.297917000  | 1.201986000  |
| 6 | 1.901917000  | 0.365126000  | 0.974188000  |
| 1 | 1.049159000  | -0.197749000 | 1.381797000  |
| 6 | 3.200913000  | -0.345902000 | 1.395432000  |
| 1 | 3.274073000  | -0.338462000 | 2.495030000  |
| 6 | 3.195244000  | -1.801808000 | 0.906727000  |
| 1 | 2.320409000  | -2.315065000 | 1.330898000  |
| 6 | 4.480273000  | -2.502441000 | 1.352138000  |

|   |             |              |             |
|---|-------------|--------------|-------------|
| 1 | 4.542111000 | -2.507064000 | 2.447974000 |
| 1 | 4.476581000 | -3.548972000 | 1.021354000 |
| 6 | 5.688237000 | -1.773063000 | 0.760025000 |
| 1 | 6.614235000 | -2.276435000 | 1.071440000 |
| 6 | 5.739817000 | -0.305666000 | 1.238760000 |
| 1 | 5.817090000 | -0.289866000 | 2.336570000 |
| 6 | 6.972104000 | 0.376909000  | 0.623458000 |
| 1 | 7.876190000 | -0.161042000 | 0.936236000 |
| 1 | 7.077079000 | 1.404112000  | 0.988313000 |
| 6 | 4.375282000 | 1.858688000  | 1.369999000 |
| 1 | 4.429290000 | 1.825537000  | 2.467546000 |
| 1 | 5.236494000 | 2.443527000  | 1.032898000 |

---

**MP1**

|   |              |              |              |
|---|--------------|--------------|--------------|
| 1 | -5.214193000 | 0.482484000  | 2.317611000  |
| 6 | -3.559945000 | 0.154997000  | -0.718018000 |
| 6 | -3.749454000 | -0.048921000 | 0.817377000  |
| 6 | -2.611348000 | 0.638129000  | 1.599676000  |
| 1 | -1.638247000 | 0.180043000  | 1.384230000  |
| 1 | -2.790348000 | 0.491836000  | 2.674430000  |
| 6 | -2.553051000 | 2.139787000  | 1.279987000  |
| 1 | -1.718540000 | 2.595809000  | 1.825973000  |
| 6 | -3.872772000 | 2.793001000  | 1.703960000  |
| 1 | -3.846884000 | 3.870748000  | 1.498019000  |
| 1 | -4.026007000 | 2.669422000  | 2.783686000  |
| 6 | -5.023074000 | 2.139185000  | 0.934780000  |
| 1 | -5.977271000 | 2.594851000  | 1.235462000  |
| 6 | -5.084193000 | 0.629059000  | 1.233059000  |
| 6 | -6.267501000 | -0.017997000 | 0.497518000  |
| 1 | -7.197122000 | 0.471417000  | 0.820544000  |
| 6 | -6.325871000 | -1.512495000 | 0.819318000  |
| 1 | -6.470845000 | -1.657199000 | 1.897706000  |
| 1 | -7.180309000 | -1.976932000 | 0.310347000  |
| 6 | -5.025098000 | -2.180864000 | 0.369739000  |
| 1 | -5.064202000 | -3.256048000 | 0.593476000  |
| 6 | -3.810076000 | -1.568878000 | 1.099732000  |
| 1 | -3.932463000 | -1.715239000 | 2.183749000  |
| 6 | -2.533355000 | -2.278714000 | 0.623174000  |
| 1 | -2.614199000 | -3.351525000 | 0.839968000  |
| 1 | -1.656205000 | -1.913961000 | 1.169882000  |
| 6 | -2.354687000 | -2.069110000 | -0.888626000 |
| 1 | -1.426782000 | -2.550569000 | -1.221380000 |
| 6 | -3.552313000 | -2.681041000 | -1.623000000 |
| 1 | -3.437375000 | -2.552936000 | -2.706972000 |
| 1 | -3.608150000 | -3.759044000 | -1.425180000 |
| 6 | -4.834195000 | -1.991494000 | -1.148527000 |
| 1 | -5.701572000 | -2.418717000 | -1.671555000 |
| 6 | -4.775004000 | -0.481677000 | -1.445855000 |
| 1 | -4.634692000 | -0.334640000 | -2.529103000 |
| 6 | -6.079786000 | 0.204300000  | -1.014494000 |

|   |              |              |              |
|---|--------------|--------------|--------------|
| 1 | -6.919123000 | -0.257529000 | -1.553318000 |
| 6 | -6.013202000 | 1.698614000  | -1.334882000 |
| 1 | -5.891042000 | 1.844048000  | -2.416016000 |
| 1 | -6.949892000 | 2.191094000  | -1.043472000 |
| 6 | -4.838047000 | 2.327696000  | -0.584059000 |
| 1 | -4.788387000 | 3.402747000  | -0.806718000 |
| 6 | -3.503123000 | 1.675029000  | -1.002112000 |
| 1 | -3.356612000 | 1.819916000  | -2.083330000 |
| 6 | -2.356591000 | 2.347888000  | -0.230546000 |
| 1 | -2.353895000 | 3.422264000  | -0.454883000 |
| 1 | -1.384333000 | 1.959209000  | -0.551071000 |
| 6 | -2.286720000 | -0.566746000 | -1.194518000 |
| 1 | -2.169127000 | -0.406047000 | -2.276153000 |
| 1 | -1.400864000 | -0.134156000 | -0.707180000 |
| 6 | 4.003730000  | -0.417595000 | -0.825686000 |
| 6 | 2.863786000  | -0.411135000 | -1.863347000 |
| 1 | 2.926496000  | 0.462747000  | -2.518694000 |
| 1 | 2.972329000  | -1.295147000 | -2.507794000 |
| 6 | 1.490663000  | -0.432048000 | -1.174926000 |
| 1 | 0.698658000  | -0.399781000 | -1.933849000 |
| 6 | 1.360973000  | -1.712591000 | -0.343942000 |
| 1 | 1.427353000  | -2.596006000 | -0.992406000 |
| 1 | 0.380481000  | -1.742944000 | 0.150405000  |
| 6 | 2.475133000  | -1.742477000 | 0.703693000  |
| 1 | 2.399141000  | -2.661964000 | 1.301059000  |
| 6 | 3.857891000  | -1.709693000 | 0.025579000  |
| 1 | 3.944686000  | -2.572951000 | -0.654066000 |
| 6 | 4.972674000  | -1.790188000 | 1.078506000  |
| 1 | 4.851379000  | -2.718471000 | 1.654272000  |
| 6 | 4.831348000  | -0.585757000 | 2.027468000  |
| 1 | 5.626646000  | -0.629176000 | 2.784803000  |
| 6 | 3.461668000  | -0.591371000 | 2.708967000  |
| 1 | 3.342336000  | -1.499851000 | 3.313042000  |
| 1 | 3.379427000  | 0.266022000  | 3.389385000  |
| 6 | 2.365053000  | -0.526146000 | 1.644735000  |
| 1 | 1.376613000  | -0.536900000 | 2.126785000  |
| 6 | 2.488402000  | 0.762185000  | 0.802434000  |
| 1 | 2.392536000  | 1.635074000  | 1.465872000  |
| 6 | 1.360962000  | 0.781729000  | -0.241201000 |
| 1 | 0.394766000  | 0.742706000  | 0.280653000  |
| 1 | 1.366340000  | 1.714366000  | -0.815712000 |
| 6 | 3.881749000  | 0.809711000  | 0.130606000  |
| 6 | 4.105880000  | 2.123220000  | -0.644047000 |
| 1 | 4.026087000  | 2.963126000  | 0.060825000  |
| 1 | 3.330432000  | 2.275747000  | -1.400814000 |
| 6 | 5.485338000  | 2.136963000  | -1.319450000 |
| 1 | 5.606187000  | 3.069284000  | -1.883361000 |
| 6 | 5.606606000  | 0.938667000  | -2.273187000 |
| 1 | 6.603929000  | 0.931867000  | -2.731207000 |
| 1 | 4.886328000  | 1.028292000  | -3.092930000 |

|   |             |              |              |
|---|-------------|--------------|--------------|
| 6 | 5.399444000 | -0.370511000 | -1.494529000 |
| 1 | 5.484526000 | -1.226880000 | -2.180813000 |
| 6 | 6.493626000 | -0.484567000 | -0.410915000 |
| 1 | 7.476755000 | -0.467592000 | -0.901844000 |
| 6 | 6.338756000 | -1.778619000 | 0.389973000  |
| 1 | 7.139967000 | -1.854697000 | 1.136232000  |
| 1 | 6.429072000 | -2.647208000 | -0.275132000 |
| 6 | 4.999105000 | 0.699784000  | 1.204706000  |
| 1 | 4.907456000 | 1.568693000  | 1.876481000  |
| 6 | 6.383617000 | 0.730785000  | 0.531071000  |
| 1 | 7.154391000 | 0.646546000  | 1.310275000  |
| 6 | 6.573551000 | 2.034470000  | -0.246292000 |
| 1 | 7.567811000 | 2.055082000  | -0.710528000 |
| 1 | 6.513240000 | 2.891307000  | 0.436914000  |

---

**MP2**

---

|   |             |              |              |
|---|-------------|--------------|--------------|
| 1 | 4.867700000 | 0.635137000  | -2.191078000 |
| 6 | 3.049796000 | -0.036456000 | 0.690454000  |
| 6 | 3.261244000 | 0.086211000  | -0.851198000 |
| 6 | 2.320945000 | 1.155724000  | -1.440469000 |
| 1 | 1.270299000 | 0.868096000  | -1.327435000 |
| 1 | 2.509138000 | 1.230793000  | -2.521061000 |
| 6 | 2.554559000 | 2.520757000  | -0.775099000 |
| 1 | 1.854936000 | 3.254838000  | -1.193894000 |
| 6 | 3.996756000 | 2.966981000  | -1.041058000 |
| 1 | 4.180641000 | 3.948569000  | -0.586041000 |
| 1 | 4.167717000 | 3.069146000  | -2.120271000 |
| 6 | 4.956415000 | 1.928103000  | -0.455186000 |
| 1 | 5.995268000 | 2.233130000  | -0.645247000 |
| 6 | 4.722929000 | 0.549664000  | -1.101949000 |
| 6 | 5.717071000 | -0.481394000 | -0.546442000 |
| 1 | 6.739877000 | -0.133854000 | -0.749259000 |
| 6 | 5.486061000 | -1.839099000 | -1.212410000 |
| 1 | 5.646221000 | -1.756589000 | -2.295101000 |
| 1 | 6.205549000 | -2.575299000 | -0.831538000 |
| 6 | 4.058211000 | -2.308797000 | -0.926834000 |
| 1 | 3.888302000 | -3.286939000 | -1.398100000 |
| 6 | 3.025653000 | -1.306098000 | -1.485821000 |
| 1 | 3.164187000 | -1.218429000 | -2.574097000 |
| 6 | 1.611219000 | -1.827493000 | -1.185203000 |
| 1 | 1.482449000 | -2.815038000 | -1.647166000 |
| 1 | 0.850997000 | -1.174379000 | -1.628519000 |
| 6 | 1.412844000 | -1.940880000 | 0.335083000  |
| 1 | 0.393700000 | -2.287895000 | 0.550738000  |
| 6 | 2.428032000 | -2.942039000 | 0.897224000  |
| 1 | 2.291940000 | -3.049578000 | 1.980861000  |
| 1 | 2.273036000 | -3.931134000 | 0.447846000  |
| 6 | 3.842390000 | -2.441579000 | 0.594298000  |
| 1 | 4.581219000 | -3.148733000 | 0.997349000  |
| 6 | 4.077160000 | -1.063547000 | 1.240651000  |

|   |              |              |              |
|---|--------------|--------------|--------------|
| 1 | 3.922174000  | -1.146290000 | 2.328604000  |
| 6 | 5.511860000  | -0.582323000 | 0.976540000  |
| 1 | 6.215447000  | -1.320608000 | 1.386360000  |
| 6 | 5.736076000  | 0.776901000  | 1.641654000  |
| 1 | 5.598149000  | 0.689415000  | 2.727028000  |
| 1 | 6.765290000  | 1.117544000  | 1.470220000  |
| 6 | 4.747485000  | 1.793200000  | 1.066743000  |
| 1 | 4.907548000  | 2.773390000  | 1.537204000  |
| 6 | 3.290347000  | 1.353680000  | 1.326610000  |
| 1 | 3.129473000  | 1.269958000  | 2.412189000  |
| 6 | 2.338535000  | 2.409214000  | 0.742834000  |
| 1 | 2.542020000  | 3.379107000  | 1.214616000  |
| 1 | 1.294512000  | 2.165464000  | 0.969007000  |
| 6 | 1.636969000  | -0.570916000 | 0.993080000  |
| 1 | 1.512564000  | -0.652687000 | 2.083144000  |
| 1 | 0.873166000  | 0.132018000  | 0.643861000  |
| 6 | -3.049794000 | 0.036453000  | -0.690451000 |
| 6 | -1.636964000 | 0.570909000  | -0.993073000 |
| 1 | -0.873164000 | -0.132027000 | -0.643850000 |
| 1 | -1.512554000 | 0.652678000  | -2.083136000 |
| 6 | -1.412837000 | 1.940873000  | -0.335078000 |
| 1 | -0.393691000 | 2.287885000  | -0.550729000 |
| 6 | -2.428020000 | 2.942034000  | -0.897223000 |
| 1 | -2.291923000 | 3.049571000  | -1.980860000 |
| 1 | -2.273023000 | 3.931129000  | -0.447846000 |
| 6 | -3.842380000 | 2.441579000  | -0.594303000 |
| 1 | -4.581206000 | 3.148734000  | -0.997357000 |
| 6 | -4.077152000 | 1.063547000  | -1.240654000 |
| 1 | -3.922161000 | 1.146288000  | -2.328606000 |
| 6 | -5.511855000 | 0.582328000  | -0.976549000 |
| 1 | -6.215438000 | 1.320615000  | -1.386372000 |
| 6 | -5.717071000 | 0.481401000  | 0.546433000  |
| 1 | -6.739880000 | 0.133865000  | 0.749247000  |
| 6 | -5.486060000 | 1.839106000  | 1.212401000  |
| 1 | -6.205544000 | 2.575308000  | 0.831524000  |
| 1 | -5.646224000 | 1.756599000  | 2.295091000  |
| 6 | -4.058207000 | 2.308800000  | 0.926830000  |
| 1 | -3.888297000 | 3.286942000  | 1.398094000  |
| 6 | -3.025655000 | 1.306098000  | 1.485822000  |
| 1 | -3.164193000 | 1.218431000  | 2.574097000  |
| 6 | -1.611218000 | 1.827488000  | 1.185208000  |
| 1 | -1.482447000 | 2.815033000  | 1.647170000  |
| 1 | -0.851000000 | 1.174372000  | 1.628528000  |
| 6 | -3.261247000 | -0.086211000 | 0.851200000  |
| 6 | -2.320954000 | -1.155726000 | 1.440476000  |
| 1 | -2.509151000 | -1.230792000 | 2.521067000  |
| 1 | -1.270307000 | -0.868102000 | 1.327445000  |
| 6 | -2.554571000 | -2.520760000 | 0.775107000  |
| 1 | -1.854952000 | -3.254842000 | 1.193906000  |
| 6 | -2.338540000 | -2.409219000 | -0.742825000 |

|   |              |              |              |
|---|--------------|--------------|--------------|
| 1 | -2.542026000 | -3.379112000 | -1.214607000 |
| 1 | -1.294515000 | -2.165473000 | -0.968994000 |
| 6 | -3.290346000 | -1.353683000 | -1.326607000 |
| 1 | -3.129467000 | -1.269963000 | -2.412185000 |
| 6 | -4.747487000 | -1.793198000 | -1.066745000 |
| 1 | -4.907551000 | -2.773388000 | -1.537205000 |
| 6 | -5.736072000 | -0.776896000 | -1.641661000 |
| 1 | -6.765288000 | -1.117536000 | -1.470231000 |
| 1 | -5.598141000 | -0.689412000 | -2.727035000 |
| 6 | -4.722935000 | -0.549659000 | 1.101945000  |
| 1 | -4.867710000 | -0.635130000 | 2.191074000  |
| 6 | -4.956423000 | -1.928098000 | 0.455184000  |
| 1 | -5.995278000 | -2.233121000 | 0.645241000  |
| 6 | -3.996770000 | -2.966978000 | 1.041061000  |
| 1 | -4.180656000 | -3.948567000 | 0.586045000  |
| 1 | -4.167736000 | -3.069141000 | 2.120273000  |

---

**MP3**

|   |              |              |              |
|---|--------------|--------------|--------------|
| 1 | -5.279144000 | 1.280118000  | -1.491947000 |
| 6 | -2.869189000 | -0.072016000 | 0.612908000  |
| 6 | -4.324459000 | 0.285345000  | 0.174361000  |
| 6 | -4.977920000 | 1.239957000  | 1.192735000  |
| 1 | -5.088439000 | 0.762695000  | 2.171151000  |
| 1 | -5.992691000 | 1.481124000  | 0.845322000  |
| 6 | -4.157382000 | 2.529503000  | 1.344881000  |
| 1 | -4.629997000 | 3.176209000  | 2.093391000  |
| 6 | -4.099561000 | 3.253275000  | -0.004304000 |
| 1 | -3.527194000 | 4.185013000  | 0.088898000  |
| 1 | -5.111574000 | 3.522235000  | -0.332837000 |
| 6 | -3.442218000 | 2.332868000  | -1.034684000 |
| 1 | -3.400617000 | 2.836322000  | -2.010984000 |
| 6 | -4.249749000 | 1.029711000  | -1.188197000 |
| 6 | -3.619635000 | 0.128855000  | -2.261029000 |
| 1 | -3.593184000 | 0.675725000  | -3.214058000 |
| 6 | -4.444559000 | -1.149998000 | -2.416267000 |
| 1 | -5.465170000 | -0.899930000 | -2.733428000 |
| 1 | -4.009101000 | -1.790096000 | -3.194290000 |
| 6 | -4.477549000 | -1.899348000 | -1.082501000 |
| 1 | -5.063524000 | -2.822843000 | -1.190188000 |
| 6 | -5.120501000 | -1.033370000 | 0.022515000  |
| 1 | -6.151192000 | -0.783806000 | -0.272164000 |
| 6 | -5.137249000 | -1.834270000 | 1.334772000  |
| 1 | -5.710138000 | -2.758444000 | 1.185493000  |
| 1 | -5.643221000 | -1.277448000 | 2.130548000  |
| 6 | -3.699155000 | -2.180039000 | 1.752982000  |
| 1 | -3.713787000 | -2.727155000 | 2.702866000  |
| 6 | -3.054069000 | -3.045038000 | 0.665191000  |
| 1 | -2.027391000 | -3.308701000 | 0.952073000  |
| 1 | -3.611949000 | -3.982293000 | 0.543823000  |
| 6 | -3.042767000 | -2.263762000 | -0.650405000 |

|   |              |              |              |
|---|--------------|--------------|--------------|
| 1 | -2.577417000 | -2.870923000 | -1.439836000 |
| 6 | -2.237374000 | -0.961006000 | -0.494883000 |
| 1 | -1.210112000 | -1.213410000 | -0.184305000 |
| 6 | -2.179168000 | -0.202155000 | -1.828697000 |
| 1 | -1.713377000 | -0.849852000 | -2.585248000 |
| 6 | -1.358327000 | 1.077138000  | -1.662253000 |
| 1 | -0.333832000 | 0.822143000  | -1.361754000 |
| 1 | -1.293079000 | 1.615851000  | -2.616709000 |
| 6 | -2.007771000 | 1.967397000  | -0.601609000 |
| 1 | -1.421458000 | 2.890121000  | -0.483408000 |
| 6 | -2.073208000 | 1.247002000  | 0.762911000  |
| 1 | -1.049617000 | 1.001980000  | 1.087930000  |
| 6 | -2.727614000 | 2.184463000  | 1.790540000  |
| 1 | -2.133720000 | 3.104166000  | 1.868037000  |
| 1 | -2.735686000 | 1.732035000  | 2.787731000  |
| 6 | -2.884593000 | -0.889022000 | 1.920015000  |
| 1 | -1.848657000 | -1.133952000 | 2.195236000  |
| 1 | -3.296271000 | -0.304399000 | 2.748280000  |
| 6 | 2.869180000  | 0.072024000  | -0.612899000 |
| 6 | 2.884571000  | 0.889038000  | -1.920001000 |
| 1 | 3.296235000  | 0.304417000  | -2.748275000 |
| 1 | 1.848633000  | 1.133976000  | -2.195207000 |
| 6 | 3.699143000  | 2.180049000  | -1.752971000 |
| 1 | 3.713764000  | 2.727172000  | -2.702851000 |
| 6 | 3.054077000  | 3.045045000  | -0.665165000 |
| 1 | 2.027396000  | 3.308716000  | -0.952031000 |
| 1 | 3.611965000  | 3.982296000  | -0.543799000 |
| 6 | 3.042790000  | 2.263761000  | 0.650426000  |
| 1 | 2.577455000  | 2.870919000  | 1.439867000  |
| 6 | 2.237387000  | 0.961010000  | 0.494907000  |
| 1 | 1.210121000  | 1.213424000  | 0.184347000  |
| 6 | 2.179195000  | 0.202152000  | 1.828717000  |
| 1 | 1.713419000  | 0.849846000  | 2.585280000  |
| 6 | 3.619666000  | -0.128870000 | 2.261026000  |
| 1 | 3.593226000  | -0.675746000 | 3.214053000  |
| 6 | 4.444600000  | 1.149977000  | 2.416261000  |
| 1 | 4.009158000  | 1.790072000  | 3.194294000  |
| 1 | 5.465214000  | 0.899901000  | 2.733405000  |
| 6 | 4.477576000  | 1.899335000  | 1.082499000  |
| 1 | 5.063558000  | 2.822826000  | 1.190184000  |
| 6 | 5.120507000  | 1.033360000  | -0.022531000 |
| 1 | 6.151200000  | 0.783789000  | 0.272131000  |
| 6 | 5.137241000  | 1.834269000  | -1.334783000 |
| 1 | 5.710137000  | 2.758438000  | -1.185506000 |
| 1 | 5.643198000  | 1.277449000  | -2.130570000 |
| 6 | 4.324454000  | -0.285348000 | -0.174374000 |
| 6 | 4.977895000  | -1.239958000 | -1.192764000 |
| 1 | 5.992670000  | -1.481133000 | -0.845367000 |
| 1 | 5.088403000  | -0.762690000 | -2.171178000 |
| 6 | 4.157347000  | -2.529499000 | -1.344906000 |

|   |             |              |              |
|---|-------------|--------------|--------------|
| 1 | 4.629948000 | -3.176202000 | -2.093427000 |
| 6 | 2.727575000 | -2.184447000 | -1.790543000 |
| 1 | 2.133674000 | -3.104146000 | -1.868037000 |
| 1 | 2.735636000 | -1.732013000 | -2.787731000 |
| 6 | 2.073190000 | -1.246989000 | -0.762899000 |
| 1 | 1.049596000 | -1.001959000 | -1.087904000 |
| 6 | 2.007766000 | -1.967391000 | 0.601618000  |
| 1 | 1.421446000 | -2.890111000 | 0.483419000  |
| 6 | 1.358343000 | -1.077135000 | 1.662277000  |
| 1 | 1.293105000 | -1.615853000 | 2.616730000  |
| 1 | 0.333845000 | -0.822131000 | 1.361795000  |
| 6 | 4.249760000 | -1.029723000 | 1.188179000  |
| 1 | 5.279157000 | -1.280138000 | 1.491913000  |
| 6 | 3.442217000 | -2.332874000 | 1.034670000  |
| 1 | 3.400627000 | -2.836334000 | 2.010967000  |
| 6 | 4.099541000 | -3.253278000 | 0.004275000  |
| 1 | 3.527166000 | -4.185012000 | -0.088925000 |
| 1 | 5.111556000 | -3.522247000 | 0.332792000  |

---

**MP4**

---

|   |             |              |              |
|---|-------------|--------------|--------------|
| 1 | 5.704024000 | -0.196014000 | -0.994522000 |
| 6 | 2.585665000 | 0.046203000  | 0.513743000  |
| 6 | 4.120650000 | 0.299657000  | 0.393357000  |
| 6 | 4.870581000 | -0.351132000 | 1.572054000  |
| 1 | 4.584810000 | 0.104271000  | 2.525070000  |
| 1 | 5.947156000 | -0.166794000 | 1.446941000  |
| 6 | 4.602079000 | -1.862644000 | 1.629218000  |
| 1 | 5.124978000 | -2.293213000 | 2.491219000  |
| 6 | 5.106480000 | -2.513514000 | 0.337260000  |
| 1 | 4.934868000 | -3.597091000 | 0.365829000  |
| 1 | 6.187422000 | -2.355987000 | 0.231476000  |
| 6 | 4.368578000 | -1.895337000 | -0.852032000 |
| 1 | 4.725887000 | -2.348137000 | -1.787800000 |
| 6 | 4.619784000 | -0.376387000 | -0.914224000 |
| 6 | 3.921745000 | 0.234973000  | -2.138496000 |
| 1 | 4.304679000 | -0.252466000 | -3.046150000 |
| 6 | 4.198303000 | 1.738380000  | -2.197427000 |
| 1 | 5.277365000 | 1.915995000  | -2.291410000 |
| 1 | 3.717352000 | 2.178150000  | -3.080605000 |
| 6 | 3.664061000 | 2.403606000  | -0.927479000 |
| 1 | 3.853251000 | 3.485435000  | -0.967842000 |
| 6 | 4.352217000 | 1.829164000  | 0.330452000  |
| 1 | 5.435147000 | 2.013211000  | 0.261073000  |
| 6 | 3.786537000 | 2.534919000  | 1.574178000  |
| 1 | 3.972696000 | 3.613403000  | 1.491853000  |
| 1 | 4.294442000 | 2.197913000  | 2.483945000  |
| 6 | 2.274157000 | 2.278500000  | 1.676819000  |
| 1 | 1.878139000 | 2.760620000  | 2.578571000  |
| 6 | 1.586198000 | 2.855360000  | 0.435449000  |
| 1 | 0.500677000 | 2.700259000  | 0.495562000  |



|   |              |              |              |
|---|--------------|--------------|--------------|
| 1 | 1.757058000  | 3.937844000  | 0.375645000  |
| 6 | 2.145063000  | 2.164750000  | -0.809765000 |
| 1 | 1.650596000  | 2.560852000  | -1.708500000 |
| 6 | 1.897412000  | 0.646313000  | -0.743212000 |
| 1 | 0.813879000  | 0.465186000  | -0.650470000 |
| 6 | 2.410254000  | -0.037035000 | -2.019194000 |
| 1 | 1.894240000  | 0.398103000  | -2.887020000 |
| 6 | 2.137735000  | -1.540797000 | -1.951285000 |
| 1 | 1.056921000  | -1.722921000 | -1.884178000 |
| 1 | 2.492322000  | -2.032234000 | -2.866482000 |
| 6 | 2.849241000  | -2.133038000 | -0.733346000 |
| 1 | 2.658639000  | -3.214440000 | -0.682164000 |
| 6 | 2.350308000  | -1.482011000 | 0.575054000  |
| 1 | 1.268134000  | -1.661336000 | 0.677610000  |
| 6 | 3.092147000  | -2.116520000 | 1.762593000  |
| 1 | 2.899392000  | -3.196921000 | 1.772360000  |
| 1 | 2.720354000  | -1.723557000 | 2.714759000  |
| 6 | 2.013289000  | 0.766682000  | 1.749571000  |
| 1 | 0.931668000  | 0.572178000  | 1.798263000  |
| 1 | 2.441208000  | 0.369864000  | 2.675180000  |
| 6 | -4.119352000 | -0.298678000 | -0.396245000 |
| 6 | -4.864585000 | 0.353522000  | -1.577136000 |
| 1 | -4.575959000 | -0.101577000 | -2.529431000 |
| 1 | -5.941753000 | 0.170102000  | -1.455845000 |
| 6 | -4.594508000 | 1.864816000  | -1.632456000 |
| 1 | -5.114033000 | 2.296395000  | -2.495993000 |
| 6 | -5.102760000 | 2.515384000  | -0.341847000 |
| 1 | -6.184210000 | 2.358817000  | -0.239906000 |
| 1 | -4.930030000 | 3.598816000  | -0.369166000 |
| 6 | -4.369595000 | 1.895782000  | 0.849635000  |
| 1 | -4.729753000 | 2.348323000  | 1.784435000  |
| 6 | -4.622451000 | 0.377035000  | 0.909985000  |
| 1 | -5.707136000 | 0.197635000  | 0.986363000  |
| 6 | -3.929289000 | -0.235700000 | 2.136311000  |
| 1 | -4.314965000 | 0.251535000  | 3.042914000  |
| 6 | -2.417133000 | 0.034971000  | 2.022486000  |
| 1 | -1.904621000 | -0.401186000 | 2.891863000  |
| 6 | -2.142783000 | 1.538468000  | 1.956344000  |
| 1 | -2.499802000 | 2.029822000  | 2.870637000  |
| 1 | -1.061505000 | 1.719331000  | 1.892847000  |
| 6 | -2.849613000 | 2.132154000  | 0.736373000  |
| 1 | -2.657838000 | 3.213411000  | 0.686523000  |
| 6 | -2.346790000 | 1.481482000  | -0.570708000 |
| 1 | -1.264134000 | 1.659895000  | -0.669472000 |
| 6 | -3.083899000 | 2.117385000  | -1.760435000 |
| 1 | -2.890107000 | 3.197613000  | -1.768855000 |
| 1 | -2.709135000 | 1.724666000  | -2.711536000 |
| 6 | -2.583720000 | -0.046550000 | -0.511103000 |
| 6 | -2.007849000 | -0.766741000 | -1.745453000 |
| 1 | -0.926003000 | -0.572871000 | -1.790665000 |

|   |              |              |              |
|---|--------------|--------------|--------------|
| 1 | -2.432577000 | -0.369155000 | -2.672205000 |
| 6 | -2.270031000 | -2.278401000 | -1.674401000 |
| 1 | -1.871227000 | -2.760333000 | -2.575034000 |
| 6 | -3.782997000 | -2.533587000 | -1.577240000 |
| 1 | -3.970405000 | -3.611949000 | -1.496165000 |
| 1 | -4.287369000 | -2.195633000 | -2.488623000 |
| 6 | -4.352506000 | -1.828024000 | -0.335134000 |
| 1 | -5.435839000 | -2.011154000 | -0.269741000 |
| 6 | -3.669332000 | -2.403835000 | 0.924864000  |
| 1 | -3.859626000 | -3.485518000 | 0.963920000  |
| 6 | -4.207423000 | -1.738891000 | 2.193339000  |
| 1 | -3.729970000 | -2.179651000 | 3.077921000  |
| 1 | -5.286970000 | -1.915568000 | 2.283430000  |
| 6 | -1.900403000 | -0.648064000 | 0.747919000  |
| 1 | -0.816336000 | -0.467886000 | 0.659232000  |
| 6 | -2.149707000 | -2.166286000 | 0.812683000  |
| 1 | -1.658832000 | -2.563391000 | 1.712933000  |
| 6 | -1.586956000 | -2.856572000 | -0.430932000 |
| 1 | -1.758892000 | -3.938958000 | -0.372449000 |
| 1 | -0.501096000 | -2.702287000 | -0.486948000 |

---

**MP5**

|   |              |              |              |
|---|--------------|--------------|--------------|
| 1 | -4.671557000 | -0.804398000 | 2.344486000  |
| 6 | -3.963238000 | 0.494893000  | -0.797694000 |
| 6 | -4.207375000 | 0.572150000  | 0.742104000  |
| 6 | -5.442927000 | 1.440750000  | 1.049599000  |
| 1 | -5.288277000 | 2.477488000  | 0.735406000  |
| 1 | -5.594215000 | 1.462308000  | 2.138274000  |
| 6 | -6.695721000 | 0.881241000  | 0.358598000  |
| 1 | -7.551411000 | 1.532193000  | 0.572868000  |
| 6 | -6.973349000 | -0.531203000 | 0.883627000  |
| 1 | -7.873873000 | -0.942250000 | 0.409775000  |
| 1 | -7.156317000 | -0.503341000 | 1.965368000  |
| 6 | -5.766320000 | -1.421109000 | 0.580077000  |
| 1 | -5.948417000 | -2.436998000 | 0.958515000  |
| 6 | -4.500249000 | -0.864487000 | 1.257502000  |
| 6 | -3.301222000 | -1.786377000 | 0.992770000  |
| 1 | -3.532188000 | -2.789530000 | 1.377995000  |
| 6 | -2.057402000 | -1.234895000 | 1.690472000  |
| 1 | -2.224672000 | -1.189784000 | 2.774300000  |
| 1 | -1.202709000 | -1.902227000 | 1.519788000  |
| 6 | -1.748448000 | 0.162425000  | 1.148462000  |
| 1 | -0.850075000 | 0.561996000  | 1.643041000  |
| 6 | -2.925142000 | 1.129290000  | 1.408174000  |
| 1 | -3.099578000 | 1.197803000  | 2.492616000  |
| 6 | -2.562757000 | 2.516526000  | 0.853761000  |
| 1 | -1.650551000 | 2.875373000  | 1.348121000  |
| 1 | -3.347842000 | 3.247101000  | 1.075203000  |
| 6 | -2.324539000 | 2.426529000  | -0.662057000 |
| 1 | -2.093247000 | 3.422185000  | -1.058078000 |

|   |              |              |              |
|---|--------------|--------------|--------------|
| 6 | -1.150059000 | 1.478120000  | -0.923819000 |
| 1 | -0.942285000 | 1.413258000  | -2.000400000 |
| 1 | -0.242562000 | 1.864543000  | -0.438623000 |
| 6 | -1.496540000 | 0.093593000  | -0.371343000 |
| 1 | -0.668137000 | -0.603458000 | -0.563589000 |
| 6 | -2.763706000 | -0.459775000 | -1.049953000 |
| 1 | -2.594688000 | -0.509947000 | -2.137790000 |
| 6 | -3.078248000 | -1.869838000 | -0.528882000 |
| 1 | -2.217271000 | -2.523469000 | -0.730870000 |
| 6 | -4.325428000 | -2.415641000 | -1.226564000 |
| 1 | -4.151153000 | -2.480060000 | -2.308281000 |
| 1 | -4.545231000 | -3.430384000 | -0.870637000 |
| 6 | -5.512496000 | -1.493787000 | -0.939152000 |
| 1 | -6.413139000 | -1.884731000 | -1.432896000 |
| 6 | -5.243333000 | -0.066110000 | -1.463034000 |
| 1 | -5.078426000 | -0.109113000 | -2.550386000 |
| 6 | -6.465313000 | 0.815491000  | -1.159442000 |
| 1 | -7.349610000 | 0.386520000  | -1.647934000 |
| 1 | -6.337590000 | 1.822080000  | -1.571389000 |
| 6 | -3.581807000 | 1.880156000  | -1.355027000 |
| 1 | -3.402312000 | 1.785724000  | -2.435508000 |
| 1 | -4.400710000 | 2.596043000  | -1.236305000 |
| 6 | 3.412334000  | 0.081130000  | 0.715946000  |
| 6 | 2.383921000  | 1.163549000  | 1.095758000  |
| 1 | 1.378121000  | 0.884479000  | 0.764564000  |
| 1 | 2.342185000  | 1.241483000  | 2.191893000  |
| 6 | 2.764194000  | 2.522103000  | 0.488318000  |
| 1 | 2.002221000  | 3.265671000  | 0.753198000  |
| 6 | 4.128382000  | 2.953871000  | 1.037807000  |
| 1 | 4.079881000  | 3.061865000  | 2.128833000  |
| 1 | 4.411869000  | 3.930195000  | 0.624446000  |
| 6 | 5.174116000  | 1.900593000  | 0.662298000  |
| 1 | 6.156935000  | 2.195862000  | 1.056352000  |
| 6 | 4.797908000  | 0.529617000  | 1.255090000  |
| 1 | 4.720219000  | 0.621674000  | 2.350549000  |
| 6 | 5.870644000  | -0.517012000 | 0.917455000  |
| 1 | 6.835790000  | -0.179481000 | 1.320790000  |
| 6 | 5.975652000  | -0.627416000 | -0.615173000 |
| 1 | 6.738625000  | -1.376259000 | -0.870542000 |
| 6 | 6.346137000  | 0.724544000  | -1.228221000 |
| 1 | 7.323830000  | 1.055032000  | -0.854517000 |
| 1 | 6.428869000  | 0.630391000  | -2.318645000 |
| 6 | 5.274687000  | 1.756482000  | -0.869852000 |
| 1 | 5.539168000  | 2.731170000  | -1.303257000 |
| 6 | 3.894840000  | 1.331873000  | -1.416756000 |
| 1 | 3.955634000  | 1.243060000  | -2.512126000 |
| 6 | 2.857023000  | 2.401445000  | -1.041439000 |
| 1 | 3.161936000  | 3.365612000  | -1.468177000 |
| 1 | 1.876472000  | 2.166065000  | -1.469339000 |
| 6 | 3.513393000  | -0.051579000 | -0.836476000 |

|   |             |              |              |
|---|-------------|--------------|--------------|
| 6 | 2.187292000 | -0.574788000 | -1.420913000 |
| 1 | 2.299089000 | -0.674707000 | -2.510085000 |
| 1 | 1.372461000 | 0.137502000  | -1.255260000 |
| 6 | 1.814594000 | -1.933441000 | -0.807839000 |
| 1 | 0.853953000 | -2.270009000 | -1.218984000 |
| 6 | 1.703892000 | -1.802954000 | 0.719690000  |
| 1 | 1.460878000 | -2.780287000 | 1.157403000  |
| 1 | 0.885933000 | -1.126006000 | 0.990183000  |
| 6 | 3.035718000 | -1.302658000 | 1.297680000  |
| 1 | 2.952223000 | -1.207501000 | 2.390992000  |
| 6 | 4.145903000 | -2.322067000 | 0.964597000  |
| 1 | 3.871208000 | -3.294169000 | 1.397474000  |
| 6 | 5.492320000 | -1.867012000 | 1.530367000  |
| 1 | 6.264480000 | -2.614328000 | 1.306808000  |
| 1 | 5.431520000 | -1.777605000 | 2.622631000  |
| 6 | 4.618281000 | -1.094422000 | -1.161300000 |
| 1 | 4.685655000 | -1.184399000 | -2.257590000 |
| 6 | 4.239356000 | -2.464838000 | -0.567959000 |
| 1 | 5.034946000 | -3.183916000 | -0.809536000 |
| 6 | 2.908143000 | -2.953057000 | -1.144509000 |
| 1 | 2.654188000 | -3.935055000 | -0.725420000 |
| 1 | 2.991072000 | -3.072701000 | -2.232192000 |

---

**MP6**

|   |              |              |              |
|---|--------------|--------------|--------------|
| 1 | -3.146883000 | 0.994767000  | 2.334906000  |
| 6 | -4.002870000 | -0.689077000 | -0.579448000 |
| 6 | -4.160142000 | -0.290024000 | 0.921075000  |
| 6 | -3.987505000 | -1.522702000 | 1.830408000  |
| 1 | -4.773896000 | -2.262155000 | 1.651055000  |
| 1 | -4.090938000 | -1.202754000 | 2.877086000  |
| 6 | -2.614029000 | -2.178756000 | 1.617587000  |
| 1 | -2.531341000 | -3.066127000 | 2.255876000  |
| 6 | -1.514425000 | -1.174037000 | 1.978424000  |
| 1 | -0.522219000 | -1.626967000 | 1.846808000  |
| 1 | -1.600762000 | -0.880320000 | 3.032371000  |
| 6 | -1.654042000 | 0.055217000  | 1.079617000  |
| 1 | -0.876666000 | 0.791363000  | 1.330474000  |
| 6 | -3.030905000 | 0.716562000  | 1.274899000  |
| 6 | -3.144080000 | 1.982175000  | 0.412739000  |
| 1 | -2.340390000 | 2.677309000  | 0.695239000  |
| 6 | -4.507029000 | 2.640640000  | 0.633974000  |
| 1 | -4.614623000 | 2.931235000  | 1.686915000  |
| 1 | -4.588837000 | 3.555533000  | 0.033204000  |
| 6 | -5.614020000 | 1.659393000  | 0.242974000  |
| 1 | -6.595944000 | 2.129427000  | 0.393565000  |
| 6 | -5.545689000 | 0.376209000  | 1.099927000  |
| 1 | -5.666104000 | 0.646971000  | 2.159928000  |
| 6 | -6.681653000 | -0.568142000 | 0.674741000  |
| 1 | -7.644664000 | -0.061795000 | 0.818895000  |
| 1 | -6.703052000 | -1.466004000 | 1.301431000  |

|   |              |              |              |
|---|--------------|--------------|--------------|
| 6 | -6.515488000 | -0.949919000 | -0.804637000 |
| 1 | -7.312122000 | -1.643906000 | -1.097182000 |
| 6 | -6.590752000 | 0.318051000  | -1.661290000 |
| 1 | -6.489721000 | 0.062870000  | -2.723865000 |
| 1 | -7.565570000 | 0.805598000  | -1.533027000 |
| 6 | -5.468304000 | 1.269805000  | -1.241954000 |
| 1 | -5.506243000 | 2.182388000  | -1.853592000 |
| 6 | -4.092740000 | 0.604049000  | -1.436846000 |
| 1 | -3.980164000 | 0.315636000  | -2.494522000 |
| 6 | -2.966523000 | 1.580287000  | -1.063363000 |
| 1 | -3.049165000 | 2.476817000  | -1.693589000 |
| 6 | -1.605301000 | 0.914500000  | -1.279019000 |
| 1 | -1.477451000 | 0.650825000  | -2.337128000 |
| 1 | -0.798072000 | 1.611967000  | -1.014682000 |
| 6 | -1.511606000 | -0.336784000 | -0.405336000 |
| 1 | -0.538632000 | -0.826092000 | -0.561174000 |
| 6 | -2.617403000 | -1.353135000 | -0.758942000 |
| 1 | -2.507887000 | -1.648791000 | -1.813435000 |
| 6 | -2.459440000 | -2.587216000 | 0.143959000  |
| 1 | -1.464322000 | -3.023798000 | -0.015056000 |
| 1 | -3.187381000 | -3.362796000 | -0.116645000 |
| 6 | -5.150159000 | -1.621206000 | -1.015247000 |
| 1 | -5.015195000 | -1.869751000 | -2.077601000 |
| 1 | -5.122312000 | -2.568030000 | -0.467305000 |
| 6 | 3.265961000  | -0.028760000 | 0.579200000  |
| 6 | 1.909355000  | 0.628674000  | 0.892271000  |
| 1 | 1.095373000  | 0.115727000  | 0.372868000  |
| 1 | 1.705616000  | 0.526660000  | 1.968840000  |
| 6 | 1.908224000  | 2.112143000  | 0.494858000  |
| 1 | 0.921007000  | 2.545043000  | 0.705280000  |
| 6 | 2.983648000  | 2.849354000  | 1.300106000  |
| 1 | 2.767974000  | 2.777193000  | 2.373688000  |
| 1 | 2.991158000  | 3.915057000  | 1.038209000  |
| 6 | 4.347948000  | 2.224212000  | 0.997217000  |
| 1 | 5.128922000  | 2.739840000  | 1.573963000  |
| 6 | 4.358061000  | 0.732182000  | 1.380260000  |
| 1 | 4.119374000  | 0.635006000  | 2.451750000  |
| 6 | 5.741575000  | 0.118076000  | 1.120075000  |
| 1 | 6.490959000  | 0.666776000  | 1.707817000  |
| 6 | 6.065961000  | 0.269713000  | -0.377802000 |
| 1 | 7.053281000  | -0.169581000 | -0.578553000 |
| 6 | 6.058946000  | 1.744728000  | -0.783771000 |
| 1 | 6.825565000  | 2.295715000  | -0.223889000 |
| 1 | 6.302226000  | 1.840117000  | -1.849815000 |
| 6 | 4.678487000  | 2.342151000  | -0.504362000 |
| 1 | 4.669366000  | 3.403526000  | -0.789325000 |
| 6 | 3.585357000  | 1.606481000  | -1.309171000 |
| 1 | 3.806381000  | 1.701343000  | -2.383194000 |
| 6 | 2.223033000  | 2.248388000  | -1.003430000 |
| 1 | 2.254018000  | 3.310618000  | -1.278020000 |

|   |             |              |              |
|---|-------------|--------------|--------------|
| 1 | 1.430941000 | 1.791839000  | -1.606501000 |
| 6 | 3.595583000 | 0.103144000  | -0.940758000 |
| 6 | 2.588738000 | -0.704207000 | -1.783943000 |
| 1 | 2.858445000 | -0.601501000 | -2.844814000 |
| 1 | 1.573125000 | -0.306695000 | -1.681342000 |
| 6 | 2.600090000 | -2.187287000 | -1.383813000 |
| 1 | 1.856825000 | -2.731163000 | -1.978995000 |
| 6 | 2.264300000 | -2.325096000 | 0.109488000  |
| 1 | 2.303132000 | -3.382834000 | 0.400275000  |
| 1 | 1.240748000 | -1.985287000 | 0.303806000  |
| 6 | 3.278979000 | -1.531887000 | 0.948317000  |
| 1 | 3.031834000 | -1.628443000 | 2.016647000  |
| 6 | 4.690085000 | -2.108812000 | 0.703073000  |
| 1 | 4.689233000 | -3.170934000 | 0.985331000  |
| 6 | 5.739417000 | -1.357308000 | 1.524851000  |
| 1 | 6.730847000 | -1.797669000 | 1.357763000  |
| 1 | 5.517475000 | -1.450699000 | 2.595695000  |
| 6 | 5.007298000 | -0.498949000 | -1.182896000 |
| 1 | 5.235518000 | -0.402739000 | -2.256754000 |
| 6 | 5.016445000 | -1.990754000 | -0.799766000 |
| 1 | 6.024395000 | -2.392308000 | -0.976471000 |
| 6 | 3.996173000 | -2.766460000 | -1.636436000 |
| 1 | 4.019811000 | -3.830460000 | -1.368503000 |
| 1 | 4.249662000 | -2.691276000 | -2.701567000 |
