# Supplementary material for: Assigning the absolute configuration of single aliphatic molecules by visual inspection
Source: PubMed Central journal article supplement (PMC6010418; doi:10.1038/s41467-018-04843-z), 2018-06-20
Supplement: 41467_2018_4843_MOESM5_ESM.pdf [file 41467_2018_4843_MOESM5_ESM.pdf]

## Supplementary Data 3

### Assigning the absolute configuration of single aliphatic molecules by visual inspection

*Daniel Ebeling,<sup>1,‡,\*</sup> Marina Šekutor,<sup>2,‡,\*</sup> Marvin Stiefermann,<sup>1</sup> Jalmar Tschakert,<sup>1</sup> Jeremy E. P. Dahl,<sup>3</sup> Robert M. K. Carlson,<sup>3</sup> André Schirmeisen,<sup>1,\*</sup> and Peter R. Schreiner<sup>2,\*</sup>*

<sup>1</sup>Institute of Applied Physics, Justus-Liebig University, Heinrich-Buff-Ring 16, 35392 Giessen, Germany, [Daniel.Ebeling@ap.physik.uni-giessen.de](mailto:Daniel.Ebeling@ap.physik.uni-giessen.de), [Andre.Schirmeisen@ap.physik.uni-giessen.de](mailto:Andre.Schirmeisen@ap.physik.uni-giessen.de)

<sup>2</sup>Institute of Organic Chemistry, Justus-Liebig University, Heinrich-Buff-Ring 17, 35392 Giessen, Germany, [Marina.Sekutor@org.Chemie.uni-giessen.de](mailto:Marina.Sekutor@org.Chemie.uni-giessen.de), [prs@uni-giessen.de](mailto:prs@uni-giessen.de)

<sup>3</sup>Stanford Institute for Materials and Energy Sciences, Stanford, CA 94305, USA

<sup>‡</sup>Both contributors are considered first authors.

**Supplementary Data Set 3.** Geometries in Cartesian coordinates in Å computed using the GFN-xTB approach. Different orientations of (*M*)-[123]tetramantane (**1**) (Olympic rings, triangle and rhombus, **1a**, **1b** and **1c**, respectively) were modelled on a Cu(111) slab consisting of 216 copper atoms at 15 K.

| Orientation <b>1a</b> of ( <i>M</i> )-[123]tetramantane on Cu(111) – Olympic rings |              |              |              |
|------------------------------------------------------------------------------------|--------------|--------------|--------------|
| 29                                                                                 | 0.112615560  | 0.156840241  | -5.712189975 |
| 29                                                                                 | 2.615541640  | 0.160205765  | -5.744460218 |
| 29                                                                                 | 5.168446719  | 0.149403059  | -5.716561729 |
| 29                                                                                 | 7.721939895  | 0.139001933  | -5.688441103 |
| 29                                                                                 | 10.263523704 | 0.129015235  | -5.651664222 |
| 29                                                                                 | 12.813471981 | 0.121760325  | -5.615074203 |
| 29                                                                                 | 15.362259140 | 0.114172994  | -5.579852317 |
| 29                                                                                 | 17.900988066 | 0.110373025  | -5.520687900 |
| 29                                                                                 | 1.351010352  | 2.358529248  | -5.821727356 |
| 29                                                                                 | 3.922594694  | 2.361666960  | -5.850031195 |
| 29                                                                                 | 6.468034466  | 2.353686597  | -5.815756593 |
| 29                                                                                 | 9.004404877  | 2.346326771  | -5.786072995 |
| 29                                                                                 | 11.542200150 | 2.339069233  | -5.752331908 |
| 29                                                                                 | 14.084175117 | 2.328909008  | -5.718207618 |
| 29                                                                                 | 16.633678325 | 2.324467160  | -5.702445622 |
| 29                                                                                 | 19.162357941 | 2.280053020  | -5.513121388 |
| 29                                                                                 | 0.113918253  | 4.556145667  | -5.726778347 |
| 29                                                                                 | 2.650375620  | 4.572691283  | -5.828224234 |
| 29                                                                                 | 5.201599711  | 4.565341635  | -5.796628251 |
| 29                                                                                 | 7.738511922  | 4.552103190  | -5.738896165 |
| 29                                                                                 | 10.280013257 | 4.541495712  | -5.703461673 |
| 29                                                                                 | 12.821232420 | 4.537567007  | -5.685189801 |
| 29                                                                                 | 15.361240995 | 4.530849187  | -5.673341666 |
| 29                                                                                 | 17.927417930 | 4.519356504  | -5.581036114 |
| 29                                                                                 | 1.369471471  | 6.774206795  | -5.752559488 |
| 29                                                                                 | 3.935948335  | 6.772148345  | -5.777045315 |
| 29                                                                                 | 6.469081497  | 6.755010641  | -5.711489810 |
| 29                                                                                 | 9.014928975  | 6.747306689  | -5.693047050 |
| 29                                                                                 | 11.561673272 | 6.741251676  | -5.665498334 |
| 29                                                                                 | 14.098773418 | 6.735642843  | -5.636754226 |
| 29                                                                                 | 16.643933087 | 6.730877317  | -5.618679261 |
| 29                                                                                 | 19.185681221 | 6.703712225  | -5.452544332 |
| 29                                                                                 | 0.121911057  | 8.973848794  | -5.658408023 |
| 29                                                                                 | 2.669077189  | 8.976057846  | -5.767527637 |
| 29                                                                                 | 5.210604451  | 8.963798454  | -5.723318041 |
| 29                                                                                 | 7.749854482  | 8.958650460  | -5.681191734 |
| 29                                                                                 | 10.298190588 | 8.950721930  | -5.649357571 |
| 29                                                                                 | 12.838364046 | 8.941278066  | -5.617404044 |
| 29                                                                                 | 15.373125323 | 8.932591675  | -5.606498193 |
| 29                                                                                 | 17.938433654 | 8.920733251  | -5.521086070 |
| 29                                                                                 | 1.386330479  | 11.176967728 | -5.701279294 |
| 29                                                                                 | 3.950456415  | 11.170225959 | -5.717672386 |
| 29                                                                                 | 6.483749811  | 11.163189310 | -5.656389263 |

|    |              |              |              |
|----|--------------|--------------|--------------|
| 29 | 9.030965119  | 11.156905398 | -5.640635048 |
| 29 | 11.574214060 | 11.144442944 | -5.596060197 |
| 29 | 14.108646090 | 11.134679169 | -5.585829346 |
| 29 | 16.656136865 | 11.130639273 | -5.564395885 |
| 29 | 19.202481675 | 11.118692326 | -5.394758211 |
| 29 | 0.138817641  | 13.386092923 | -5.611695487 |
| 29 | 2.680209291  | 13.371832894 | -5.712567506 |
| 29 | 5.230733458  | 13.359603961 | -5.669679130 |
| 29 | 7.765161083  | 13.356385002 | -5.625039446 |
| 29 | 10.307706856 | 13.346977815 | -5.597755961 |
| 29 | 12.843892873 | 13.335980338 | -5.570619394 |
| 29 | 15.389462756 | 13.326458652 | -5.553190713 |
| 29 | 17.951840280 | 13.320329652 | -5.473648821 |
| 29 | 1.400748950  | 15.583914518 | -5.651533808 |
| 29 | 3.965107802  | 15.571716742 | -5.680844961 |
| 29 | 6.507362839  | 15.561516689 | -5.637336156 |
| 29 | 9.044055387  | 15.550354363 | -5.611567806 |
| 29 | 11.582868704 | 15.543287413 | -5.577187405 |
| 29 | 14.122665774 | 15.537740319 | -5.552789004 |
| 29 | 16.669653627 | 15.530612046 | -5.529670296 |
| 29 | 19.207868060 | 15.534383388 | -5.357008514 |
| 29 | 0.155624789  | 17.795010141 | -5.498415988 |
| 29 | 2.682904565  | 17.786159281 | -5.560832349 |
| 29 | 5.233144580  | 17.776568546 | -5.541917270 |
| 29 | 7.776276336  | 17.767387544 | -5.499873224 |
| 29 | 10.319319068 | 17.759093680 | -5.467219925 |
| 29 | 12.864974080 | 17.750894786 | -5.444746595 |
| 29 | 15.408123122 | 17.744182230 | -5.420298078 |
| 29 | 17.959743670 | 17.730564180 | -5.340841526 |
| 29 | 1.324566222  | 0.835016637  | -3.690543525 |
| 29 | 3.894735670  | 0.809417195  | -3.628849892 |
| 29 | 6.437379149  | 0.805808215  | -3.606119458 |
| 29 | 8.973256620  | 0.799955000  | -3.584106688 |
| 29 | 11.509192072 | 0.791626631  | -3.548359244 |
| 29 | 14.048364167 | 0.780760625  | -3.506009769 |
| 29 | 16.591387721 | 0.759812529  | -3.462904459 |
| 29 | 19.136447619 | 0.799009466  | -3.477981025 |
| 29 | 0.045934330  | 3.069163946  | -3.692783343 |
| 29 | 2.622732788  | 3.068470197  | -3.659659731 |
| 29 | 5.157708506  | 3.055445940  | -3.630812269 |
| 29 | 7.700844123  | 3.048044949  | -3.596027502 |
| 29 | 10.245983669 | 3.039419302  | -3.565330170 |
| 29 | 12.792481271 | 3.032013714  | -3.533543791 |
| 29 | 15.344339696 | 3.024879800  | -3.504151471 |
| 29 | 17.935093307 | 3.026937424  | -3.463152922 |
| 29 | 1.306968486  | 5.279865735  | -3.647126295 |
| 29 | 3.889009742  | 5.263958163  | -3.606188882 |
| 29 | 6.436721586  | 5.255453233  | -3.571699492 |
| 29 | 8.983921125  | 5.248569515  | -3.546998096 |
| 29 | 11.531449164 | 5.241250196  | -3.515453671 |

|    |              |              |              |
|----|--------------|--------------|--------------|
| 29 | 14.072462279 | 5.231566749  | -3.480632886 |
| 29 | 16.614400680 | 5.218063737  | -3.450399686 |
| 29 | 19.189905785 | 5.222804950  | -3.414214416 |
| 29 | 0.059565146  | 7.482893514  | -3.628092935 |
| 29 | 2.632802928  | 7.468870086  | -3.602478819 |
| 29 | 5.172001203  | 7.461747659  | -3.567353172 |
| 29 | 7.715661571  | 7.454531378  | -3.548177329 |
| 29 | 10.260732710 | 7.447371850  | -3.517355263 |
| 29 | 12.808274679 | 7.438459351  | -3.480292615 |
| 29 | 15.358751488 | 7.427488736  | -3.443870663 |
| 29 | 17.937313872 | 7.424228259  | -3.412176968 |
| 29 | 1.323660499  | 9.679853062  | -3.589465771 |
| 29 | 3.900441425  | 9.671652331  | -3.554593762 |
| 29 | 6.449777970  | 9.662979861  | -3.530033341 |
| 29 | 8.999053516  | 9.655416318  | -3.508294627 |
| 29 | 11.541544331 | 9.646849481  | -3.468396346 |
| 29 | 14.086926523 | 9.638965863  | -3.428602856 |
| 29 | 16.627057406 | 9.629894947  | -3.401785194 |
| 29 | 19.202359152 | 9.621099908  | -3.370735800 |
| 29 | 0.073456835  | 11.884672531 | -3.583013329 |
| 29 | 2.646867378  | 11.882371051 | -3.544505341 |
| 29 | 5.185759414  | 11.872906181 | -3.506647092 |
| 29 | 7.729756696  | 11.864126610 | -3.486031698 |
| 29 | 10.274354067 | 11.855710759 | -3.456946800 |
| 29 | 12.822436936 | 11.846892794 | -3.418111461 |
| 29 | 15.372514442 | 11.841230467 | -3.388865378 |
| 29 | 17.951274392 | 11.827181710 | -3.359106675 |
| 29 | 1.334651524  | 14.080039553 | -3.530207925 |
| 29 | 3.916899807  | 14.079031140 | -3.506505956 |
| 29 | 6.464590092  | 14.070767638 | -3.472429426 |
| 29 | 9.011960173  | 14.062346428 | -3.440159915 |
| 29 | 11.558858313 | 14.053298187 | -3.412833259 |
| 29 | 14.099938223 | 14.046126921 | -3.381742160 |
| 29 | 16.642334795 | 14.042188454 | -3.353460488 |
| 29 | 19.218237489 | 14.019329187 | -3.324440721 |
| 29 | 0.087439352  | 16.298776523 | -3.516689337 |
| 29 | 2.664687749  | 16.283172671 | -3.485143736 |
| 29 | 5.199249047  | 16.279895270 | -3.451564681 |
| 29 | 7.742547762  | 16.270243682 | -3.420718498 |
| 29 | 10.287623487 | 16.262919081 | -3.388495360 |
| 29 | 12.834142138 | 16.254347601 | -3.362106966 |
| 29 | 15.385832531 | 16.244784295 | -3.329863592 |
| 29 | 17.977126361 | 16.225084874 | -3.303772447 |
| 29 | 1.381012238  | 18.526148218 | -3.484867735 |
| 29 | 3.952003404  | 18.534900675 | -3.482470518 |
| 29 | 6.494138547  | 18.522323052 | -3.444208108 |
| 29 | 9.029322891  | 18.511830347 | -3.404380820 |
| 29 | 11.566009616 | 18.504109882 | -3.378643129 |
| 29 | 14.105207112 | 18.498724076 | -3.358861125 |
| 29 | 16.647902424 | 18.503247112 | -3.338202736 |

|    |              |              |              |
|----|--------------|--------------|--------------|
| 29 | 19.191812224 | 18.445622500 | -3.260518265 |
| 29 | 0.053183517  | 1.574080712  | -1.704224286 |
| 29 | 2.578542050  | 1.565549361  | -1.579394323 |
| 29 | 5.128623476  | 1.558131190  | -1.536955275 |
| 29 | 7.672789153  | 1.551974882  | -1.515545685 |
| 29 | 10.216212087 | 1.543783809  | -1.487619602 |
| 29 | 12.762281659 | 1.535651716  | -1.448676913 |
| 29 | 15.305175407 | 1.525623767  | -1.409079951 |
| 29 | 17.857574284 | 1.522065891  | -1.423618380 |
| 29 | 1.308609351  | 3.775228849  | -1.521784630 |
| 29 | 3.872369212  | 3.771260116  | -1.427179859 |
| 29 | 6.416164895  | 3.766230024  | -1.406544215 |
| 29 | 8.952336665  | 3.761485107  | -1.374705620 |
| 29 | 11.491571444 | 3.752580260  | -1.347572203 |
| 29 | 14.031145875 | 3.741034114  | -1.307179076 |
| 29 | 16.578030424 | 3.729900106  | -1.268320088 |
| 29 | 19.119401370 | 3.708763396  | -1.376361404 |
| 29 | 0.062376614  | 5.981848930  | -1.593316997 |
| 29 | 2.600584341  | 5.979369195  | -1.429141508 |
| 29 | 5.153994841  | 5.974961215  | -1.409678419 |
| 29 | 7.689707590  | 5.967549865  | -1.384368385 |
| 29 | 10.228472547 | 5.960537240  | -1.355553211 |
| 29 | 12.766396510 | 5.950982633  | -1.323219830 |
| 29 | 15.311383478 | 5.942017875  | -1.276939257 |
| 29 | 17.876023470 | 5.931147294  | -1.292966201 |
| 29 | 1.321445333  | 8.182660823  | -1.474567337 |
| 29 | 3.886457666  | 8.172675862  | -1.394621851 |
| 29 | 6.428234907  | 8.166930605  | -1.380160538 |
| 29 | 8.966733965  | 8.159189798  | -1.356519342 |
| 29 | 11.504894715 | 8.151581731  | -1.323912915 |
| 29 | 14.043532204 | 8.142494238  | -1.278149167 |
| 29 | 16.593101337 | 8.129564407  | -1.234377742 |
| 29 | 19.142869696 | 8.123758317  | -1.342384989 |
| 29 | 0.073395088  | 10.394702884 | -1.549088325 |
| 29 | 2.617917075  | 10.375326988 | -1.375111407 |
| 29 | 5.166925871  | 10.370093240 | -1.353289110 |
| 29 | 7.704808187  | 10.358796684 | -1.338854263 |
| 29 | 10.242582345 | 10.352234829 | -1.318338493 |
| 29 | 12.781991814 | 10.344822134 | -1.266805431 |
| 29 | 15.323317524 | 10.335743814 | -1.226562953 |
| 29 | 17.890712871 | 10.330754387 | -1.247118945 |
| 29 | 1.333121854  | 12.585983300 | -1.422782374 |
| 29 | 3.899414898  | 12.570865062 | -1.335134712 |
| 29 | 6.440795055  | 12.565360232 | -1.321835780 |
| 29 | 8.980344780  | 12.557068470 | -1.295832037 |
| 29 | 11.520591440 | 12.549383251 | -1.264063535 |
| 29 | 14.059407191 | 12.541083139 | -1.220648923 |
| 29 | 16.608545102 | 12.529798840 | -1.182238230 |
| 29 | 19.153665497 | 12.539361094 | -1.284119655 |
| 29 | 0.093734915  | 14.813027622 | -1.479735527 |

|    |              |              |               |
|----|--------------|--------------|---------------|
| 29 | 2.626950841  | 14.779897417 | -1.313948621  |
| 29 | 5.178827824  | 14.770193913 | -1.284096423  |
| 29 | 7.718558155  | 14.762365546 | -1.268346872  |
| 29 | 10.257202861 | 14.754455242 | -1.241512586  |
| 29 | 12.797786760 | 14.746756231 | -1.202803907  |
| 29 | 15.339480679 | 14.739496736 | -1.161535240  |
| 29 | 17.906795287 | 14.733196591 | -1.186752516  |
| 29 | 1.343482380  | 17.002701747 | -1.352383950  |
| 29 | 3.913423631  | 16.983111550 | -1.260399949  |
| 29 | 6.459063258  | 16.974853680 | -1.233502003  |
| 29 | 8.995665831  | 16.966746610 | -1.203316567  |
| 29 | 11.533972060 | 16.957414866 | -1.175032991  |
| 29 | 14.075709682 | 16.950820771 | -1.144645707  |
| 29 | 16.624220868 | 16.937614373 | -1.094355160  |
| 29 | 19.157942888 | 16.965165437 | -1.223449727  |
| 29 | 0.122783510  | 19.213165937 | -1.492354938  |
| 29 | 2.624286192  | 19.193661913 | -1.397349174  |
| 29 | 5.177278534  | 19.187859700 | -1.361757232  |
| 29 | 7.730489573  | 19.182275415 | -1.328084463  |
| 29 | 10.272408837 | 19.176771309 | -1.304589596  |
| 29 | 12.823222925 | 19.167042416 | -1.277942327  |
| 29 | 15.371372272 | 19.157228838 | -1.248920580  |
| 29 | 17.910717801 | 19.144706951 | -1.247906429  |
| 6  | 10.213080330 | 6.088174894  | -9.599365237  |
| 1  | 8.784138840  | 9.750595688  | -12.662600065 |
| 6  | 8.941332080  | 8.267433583  | -9.538918882  |
| 6  | 8.837971407  | 8.275515485  | -11.086239799 |
| 6  | 7.509226483  | 7.644277746  | -11.542013129 |
| 1  | 7.450216009  | 6.592437384  | -11.254511119 |
| 1  | 7.452392595  | 7.688081126  | -12.634127025 |
| 6  | 6.319314565  | 8.399388300  | -10.938764381 |
| 1  | 5.387842163  | 7.913865636  | -11.252403041 |
| 6  | 6.337807142  | 9.848289742  | -11.428165133 |
| 1  | 5.489966400  | 10.399287665 | -11.010647152 |
| 1  | 6.256954202  | 9.877964804  | -12.518499386 |
| 6  | 7.649537633  | 10.499862066 | -10.987543086 |
| 1  | 7.676769241  | 11.539130314 | -11.338234665 |
| 6  | 8.853611778  | 9.741943341  | -11.566882172 |
| 6  | 10.157321332 | 10.431704193 | -11.148756891 |
| 1  | 10.153611995 | 11.466928816 | -11.511413512 |
| 6  | 11.353380602 | 9.686897582  | -11.741177066 |
| 1  | 11.291761192 | 9.697552278  | -12.833251906 |
| 1  | 12.284650550 | 10.181744005 | -11.450253637 |
| 6  | 11.350760118 | 8.244780579  | -11.233971061 |
| 1  | 12.212227427 | 7.711502402  | -11.654650927 |
| 6  | 10.059530914 | 7.518841234  | -11.648095326 |
| 1  | 9.992171670  | 7.502072858  | -12.743319556 |
| 6  | 10.118762808 | 6.076605637  | -11.129678689 |
| 1  | 10.999309271 | 5.577850342  | -11.545150737 |
| 1  | 9.239805128  | 5.510522919  | -11.446792771 |

|   |              |              |              |
|---|--------------|--------------|--------------|
| 1 | 10.222570132 | 5.059086857  | -9.218880870 |
| 6 | 11.495079990 | 6.803410154  | -9.186289561 |
| 1 | 11.573163812 | 6.811214331  | -8.083467038 |
| 1 | 12.373803576 | 6.280207614  | -9.572003791 |
| 6 | 11.456903435 | 8.238953310  | -9.698858884 |
| 1 | 12.372203111 | 8.761030124  | -9.391282036 |
| 6 | 10.242191803 | 8.981157200  | -9.136249513 |
| 1 | 10.308777383 | 8.977276958  | -8.022566461 |
| 6 | 10.242105479 | 10.432668602 | -9.614352580 |
| 1 | 11.170171158 | 10.922151460 | -9.292505598 |
| 6 | 9.045764431  | 11.175763204 | -9.034924817 |
| 1 | 9.118184047  | 11.174123846 | -7.929627885 |
| 1 | 9.043685673  | 12.219850306 | -9.358433265 |
| 6 | 7.755270886  | 10.483917174 | -9.453808238 |
| 1 | 6.899473138  | 11.016407759 | -9.016640424 |
| 6 | 7.727912550  | 9.025950344  | -8.985892237 |
| 1 | 7.789691254  | 9.010816701  | -7.869356951 |
| 6 | 6.407185967  | 8.384836088  | -9.408860953 |
| 1 | 5.575581182  | 8.955923760  | -8.980293953 |
| 1 | 6.330614935  | 7.362158939  | -9.028049318 |
| 6 | 9.007221230  | 6.826012751  | -9.023604156 |
| 1 | 9.103275356  | 6.859081783  | -7.918023370 |
| 1 | 8.094127412  | 6.270137514  | -9.241603784 |

---

Orientation **1b** of (*M*)-[123]tetramantane on Cu(111) – triangle

---

|    |              |             |              |
|----|--------------|-------------|--------------|
| 29 | 0.105623351  | 0.040121712 | -5.691896135 |
| 29 | 2.606580061  | 0.051941306 | -5.727006729 |
| 29 | 5.159859248  | 0.048434562 | -5.701507089 |
| 29 | 7.713652408  | 0.046880446 | -5.681735832 |
| 29 | 10.255202246 | 0.045290467 | -5.653761651 |
| 29 | 12.805743774 | 0.047560997 | -5.628559821 |
| 29 | 15.353424299 | 0.047680123 | -5.597911312 |
| 29 | 17.892979903 | 0.050845778 | -5.540434774 |
| 29 | 1.334990218  | 2.244781795 | -5.804701605 |
| 29 | 3.906346781  | 2.257444707 | -5.841296801 |
| 29 | 6.451958535  | 2.258592128 | -5.814664930 |
| 29 | 8.988405861  | 2.258471761 | -5.790383508 |
| 29 | 11.526407443 | 2.258920485 | -5.762572316 |
| 29 | 14.068340187 | 2.257647176 | -5.738113915 |
| 29 | 16.618045552 | 2.261919683 | -5.728392738 |
| 29 | 19.148558285 | 2.226726391 | -5.544047202 |
| 29 | 0.089993895  | 4.439570781 | -5.711363480 |
| 29 | 2.627081624  | 4.464148671 | -5.820680342 |
| 29 | 5.179058014  | 4.465796889 | -5.799369998 |
| 29 | 7.716809425  | 4.463924836 | -5.757444499 |
| 29 | 10.256441218 | 4.462452590 | -5.725223867 |
| 29 | 12.798031766 | 4.464300836 | -5.711923035 |
| 29 | 15.338700034 | 4.464705622 | -5.704142415 |
| 29 | 17.905203362 | 4.461698647 | -5.618138502 |

|    |              |              |              |
|----|--------------|--------------|--------------|
| 29 | 1.338946432  | 6.661791295  | -5.749289769 |
| 29 | 3.905801343  | 6.667606962  | -5.778593607 |
| 29 | 6.445453414  | 6.664045605  | -5.741022062 |
| 29 | 8.981333290  | 6.658497802  | -5.705319913 |
| 29 | 11.532773607 | 6.657735034  | -5.673329256 |
| 29 | 14.066358247 | 6.665624227  | -5.677869618 |
| 29 | 16.613469362 | 6.668922100  | -5.661187255 |
| 29 | 19.156179795 | 6.650034755  | -5.499813936 |
| 29 | 0.084584612  | 8.857427414  | -5.659973189 |
| 29 | 2.632017893  | 8.867416897  | -5.773570504 |
| 29 | 5.179238994  | 8.864028593  | -5.744886609 |
| 29 | 7.708917361  | 8.863764539  | -5.694007195 |
| 29 | 10.256821988 | 8.865384704  | -5.664287876 |
| 29 | 12.805037219 | 8.861839769  | -5.646881568 |
| 29 | 15.336394839 | 8.866224203  | -5.651480490 |
| 29 | 17.901660181 | 8.862747668  | -5.570479050 |
| 29 | 1.341581164  | 11.064696378 | -5.710187430 |
| 29 | 3.905714447  | 11.066563978 | -5.731473426 |
| 29 | 6.443499216  | 11.063105453 | -5.690124129 |
| 29 | 8.982165327  | 11.068602338 | -5.677384024 |
| 29 | 11.529545144 | 11.067776558 | -5.648081052 |
| 29 | 14.067871046 | 11.064137326 | -5.623828072 |
| 29 | 16.612476178 | 11.068529627 | -5.617327139 |
| 29 | 19.159063073 | 11.065815052 | -5.452697052 |
| 29 | 0.087775897  | 13.270921056 | -5.625814240 |
| 29 | 2.627433400  | 13.263430731 | -5.730354796 |
| 29 | 5.180323658  | 13.259779645 | -5.696244260 |
| 29 | 7.714358301  | 13.264455968 | -5.664524163 |
| 29 | 10.254770127 | 13.264995670 | -5.636995924 |
| 29 | 12.794686356 | 13.263199389 | -5.613465962 |
| 29 | 15.338535294 | 13.259982949 | -5.608359251 |
| 29 | 17.900783928 | 13.262976797 | -5.536258400 |
| 29 | 1.342465236  | 15.472249168 | -5.676049310 |
| 29 | 3.906240387  | 15.468646569 | -5.709680365 |
| 29 | 6.449861959  | 15.465204653 | -5.676362751 |
| 29 | 8.985410949  | 15.463586978 | -5.656620531 |
| 29 | 11.524894872 | 15.464557798 | -5.628169407 |
| 29 | 14.065030006 | 15.467933602 | -5.609180226 |
| 29 | 16.612165023 | 15.468220167 | -5.592568624 |
| 29 | 19.150109585 | 15.481048645 | -5.429012232 |
| 29 | 0.090995958  | 17.678915862 | -5.528206408 |
| 29 | 2.617250060  | 17.678230424 | -5.595248506 |
| 29 | 5.168071926  | 17.677185261 | -5.582557633 |
| 29 | 7.711121282  | 17.675777743 | -5.549235195 |
| 29 | 10.254226617 | 17.676092554 | -5.522750050 |
| 29 | 12.800343081 | 17.676927398 | -5.505523681 |
| 29 | 15.343342778 | 17.677767165 | -5.488717146 |
| 29 | 17.895313522 | 17.673501804 | -5.414378929 |
| 29 | 1.318764482  | 0.728881599  | -3.672298085 |
| 29 | 3.889622872  | 0.711428461  | -3.615677127 |



|    |              |              |              |
|----|--------------|--------------|--------------|
| 29 | 6.432764969  | 0.716252875  | -3.599289787 |
| 29 | 8.968115752  | 0.718553541  | -3.584438694 |
| 29 | 11.504602048 | 0.719214764  | -3.557650710 |
| 29 | 14.044153791 | 0.716419963  | -3.522215152 |
| 29 | 16.586459772 | 0.703227184  | -3.485481526 |
| 29 | 19.132399040 | 0.751185430  | -3.506212540 |
| 29 | 0.033182803  | 2.958762260  | -3.674687820 |
| 29 | 2.610413896  | 2.965899858  | -3.649211193 |
| 29 | 5.145955211  | 2.961394650  | -3.629808873 |
| 29 | 7.688319454  | 2.963198617  | -3.604306205 |
| 29 | 10.233758804 | 2.962312221  | -3.580072952 |
| 29 | 12.780950701 | 2.963123879  | -3.553264382 |
| 29 | 15.332702584 | 2.964789545  | -3.531376794 |
| 29 | 17.923538230 | 2.975324890  | -3.496091977 |
| 29 | 1.287567897  | 5.173572676  | -3.641059409 |
| 29 | 3.869419959  | 5.165884592  | -3.606170878 |
| 29 | 6.417802671  | 5.166341674  | -3.584541743 |
| 29 | 8.964639559  | 5.166429168  | -3.557430768 |
| 29 | 11.511967532 | 5.167611749  | -3.531844862 |
| 29 | 14.053237741 | 5.167056493  | -3.511857126 |
| 29 | 16.595934500 | 5.162296848  | -3.487714420 |
| 29 | 19.171756236 | 5.175603997  | -3.456902251 |
| 29 | 0.032617938  | 7.372750482  | -3.626066262 |
| 29 | 2.606339146  | 7.366585410  | -3.606008213 |
| 29 | 5.146551098  | 7.368245921  | -3.580580710 |
| 29 | 7.688956411  | 7.368531609  | -3.554902891 |
| 29 | 10.234133394 | 7.369918418  | -3.535262795 |
| 29 | 12.782552818 | 7.369297972  | -3.506566765 |
| 29 | 15.332725305 | 7.367224269  | -3.484013032 |
| 29 | 17.911445403 | 7.372474483  | -3.457132141 |
| 29 | 1.289959474  | 9.573595247  | -3.596870047 |
| 29 | 3.867712276  | 9.573470200  | -3.570353775 |
| 29 | 6.415605719  | 9.574345107  | -3.544392442 |
| 29 | 8.965307516  | 9.574775039  | -3.531844260 |
| 29 | 11.508510921 | 9.574818224  | -3.505999471 |
| 29 | 14.054411772 | 9.574464599  | -3.469422506 |
| 29 | 16.594139651 | 9.573794529  | -3.449697083 |
| 29 | 19.169196080 | 9.574088425  | -3.424120152 |
| 29 | 0.033063616  | 11.774759656 | -3.592643842 |
| 29 | 2.606081805  | 11.780320991 | -3.560220460 |
| 29 | 5.145701427  | 11.779099297 | -3.532609749 |
| 29 | 7.688781451  | 11.778828025 | -3.515518165 |
| 29 | 10.233769649 | 11.778720987 | -3.500601992 |
| 29 | 12.781582695 | 11.778559150 | -3.468527250 |
| 29 | 15.332548768 | 11.781545238 | -3.436635511 |
| 29 | 17.911193541 | 11.775505618 | -3.415223082 |
| 29 | 1.286689078  | 13.974279148 | -3.549429501 |
| 29 | 3.869658693  | 13.981372928 | -3.531887609 |
| 29 | 6.417429232  | 13.981559036 | -3.507351017 |
| 29 | 8.963936731  | 13.981262018 | -3.480093628 |

|    |              |              |              |
|----|--------------|--------------|--------------|
| 29 | 11.511060303 | 13.981209498 | -3.458571060 |
| 29 | 14.053278698 | 13.981871889 | -3.432494471 |
| 29 | 16.595089004 | 13.986522719 | -3.412219599 |
| 29 | 19.170541791 | 13.972012791 | -3.390603302 |
| 29 | 0.032862313  | 16.189002964 | -3.539911682 |
| 29 | 2.609866336  | 16.181668023 | -3.513489990 |
| 29 | 5.144515003  | 16.186246341 | -3.488222946 |
| 29 | 7.687701405  | 16.185529796 | -3.463161107 |
| 29 | 10.232805289 | 16.186006308 | -3.439163406 |
| 29 | 12.779703959 | 16.185815435 | -3.417494700 |
| 29 | 15.331493900 | 16.185045935 | -3.392970868 |
| 29 | 17.922744323 | 16.173631716 | -3.373217321 |
| 29 | 1.319270047  | 18.420575277 | -3.518801312 |
| 29 | 3.889739020  | 18.437352874 | -3.522033149 |
| 29 | 6.431223320  | 18.432558874 | -3.490437532 |
| 29 | 8.967911037  | 18.430464920 | -3.458016600 |
| 29 | 11.504557026 | 18.432277796 | -3.440433657 |
| 29 | 14.042651256 | 18.434998615 | -3.425895783 |
| 29 | 16.586847810 | 18.446446912 | -3.410314606 |
| 29 | 19.130711747 | 18.397860945 | -3.338237857 |
| 29 | 0.051293882  | 1.469540387  | -1.682445279 |
| 29 | 2.576539190  | 1.469701412  | -1.564634793 |
| 29 | 5.126812326  | 1.470237568  | -1.529710043 |
| 29 | 7.671589063  | 1.471890607  | -1.516876909 |
| 29 | 10.215509397 | 1.472481116  | -1.493921178 |
| 29 | 12.760369153 | 1.473384800  | -1.460972528 |
| 29 | 15.303462042 | 1.470484522  | -1.432267132 |
| 29 | 17.856878776 | 1.475926483  | -1.452514826 |
| 29 | 1.300295852  | 3.674488571  | -1.509386460 |
| 29 | 3.863813132  | 3.680398185  | -1.423310726 |
| 29 | 6.406701159  | 3.681364878  | -1.415744168 |
| 29 | 8.944139121  | 3.685411735  | -1.385381822 |
| 29 | 11.482782175 | 3.684069494  | -1.363440394 |
| 29 | 14.023407460 | 3.681669627  | -1.334186810 |
| 29 | 16.570920422 | 3.680020423  | -1.302655478 |
| 29 | 19.112145926 | 3.667707916  | -1.416118559 |
| 29 | 0.045966607  | 5.877372563  | -1.587140257 |
| 29 | 2.585867927  | 5.883160996  | -1.427914439 |
| 29 | 5.136938097  | 5.887058769  | -1.415335241 |
| 29 | 7.674061482  | 5.887818002  | -1.396292273 |
| 29 | 10.213519006 | 5.889467133  | -1.374189112 |
| 29 | 12.751192487 | 5.888528374  | -1.351014129 |
| 29 | 15.297238377 | 5.887838038  | -1.312489889 |
| 29 | 17.861650770 | 5.885693159  | -1.334958199 |
| 29 | 1.298557607  | 8.082561812  | -1.477848086 |
| 29 | 3.862804691  | 8.081067140  | -1.403482890 |
| 29 | 6.404899995  | 8.083860499  | -1.394226335 |
| 29 | 8.944361954  | 8.084908170  | -1.376653564 |
| 29 | 11.482604165 | 8.085709190  | -1.350271017 |
| 29 | 14.022146348 | 8.084788087  | -1.317689256 |

|    |              |              |               |
|----|--------------|--------------|---------------|
| 29 | 16.571292408 | 8.079483450  | -1.278718958  |
| 29 | 19.120565094 | 8.082013091  | -1.392415555  |
| 29 | 0.043187298  | 10.290210870 | -1.554064736  |
| 29 | 2.587848937  | 10.279915550 | -1.387786061  |
| 29 | 5.136511827  | 10.283171134 | -1.370796585  |
| 29 | 7.675081474  | 10.280464220 | -1.365712623  |
| 29 | 10.213409260 | 10.282596016 | -1.348525637  |
| 29 | 12.753093519 | 10.283975918 | -1.309064621  |
| 29 | 15.293519265 | 10.282289905 | -1.272686289  |
| 29 | 17.861343804 | 10.284823932 | -1.299538880  |
| 29 | 1.296587056  | 12.486002046 | -1.436554980  |
| 29 | 3.862232546  | 12.479888475 | -1.357467580  |
| 29 | 6.404015082  | 12.482831372 | -1.351063860  |
| 29 | 8.944068034  | 12.483051836 | -1.334111582  |
| 29 | 11.484214184 | 12.483276012 | -1.308172884  |
| 29 | 14.021998777 | 12.482503238 | -1.270070187  |
| 29 | 16.571515603 | 12.479577188 | -1.234934037  |
| 29 | 19.116892218 | 12.497495503 | -1.346520449  |
| 29 | 0.049589685  | 14.709290415 | -1.497090176  |
| 29 | 2.583121086  | 14.684478624 | -1.337225572  |
| 29 | 5.134721326  | 14.683165483 | -1.317123691  |
| 29 | 7.674448819  | 14.684066968 | -1.307229527  |
| 29 | 10.213392495 | 14.683311497 | -1.285525608  |
| 29 | 12.753338891 | 14.683645360 | -1.252731697  |
| 29 | 15.295715111 | 14.685635432 | -1.218900972  |
| 29 | 17.862848300 | 14.687559006 | -1.251536863  |
| 29 | 1.292190057  | 16.903255843 | -1.380689649  |
| 29 | 3.862609654  | 16.892163194 | -1.293543337  |
| 29 | 6.407854020  | 16.892358679 | -1.276588096  |
| 29 | 8.944655118  | 16.892034501 | -1.252344804  |
| 29 | 11.482822673 | 16.891643912 | -1.230879620  |
| 29 | 14.024895391 | 16.893409935 | -1.208284128  |
| 29 | 16.573373171 | 16.888262083 | -1.163217726  |
| 29 | 19.106321082 | 16.923390570 | -1.296744339  |
| 29 | 0.063668469  | 19.110279879 | -1.528055157  |
| 29 | 2.565833199  | 19.097693322 | -1.434871205  |
| 29 | 5.117769369  | 19.100067156 | -1.404869721  |
| 29 | 7.671794698  | 19.104290441 | -1.382077430  |
| 29 | 10.214500522 | 19.106317971 | -1.364344900  |
| 29 | 12.764131062 | 19.105802867 | -1.347119864  |
| 29 | 15.313143337 | 19.103650229 | -1.321010356  |
| 29 | 17.852280159 | 19.098585726 | -1.323590430  |
| 6  | 7.558347171  | 9.187450663  | -12.991171339 |
| 1  | 12.297857441 | 9.436522932  | -11.468290418 |
| 6  | 8.912683783  | 8.984641268  | -10.879286054 |
| 6  | 10.141317203 | 9.610898171  | -11.571145475 |
| 6  | 10.202769376 | 11.130187088 | -11.327249152 |
| 1  | 9.336399062  | 11.637372851 | -11.756110631 |
| 1  | 11.095768357 | 11.537972336 | -11.811162065 |
| 6  | 10.257509645 | 11.426939121 | -9.822243765  |

|   |              |              |               |
|---|--------------|--------------|---------------|
| 1 | 10.267014792 | 12.512151428 | -9.666172091  |
| 6 | 11.523585558 | 10.809222036 | -9.236979023  |
| 1 | 11.566848731 | 11.009964665 | -8.150210420  |
| 1 | 12.416660462 | 11.250065189 | -9.687224587  |
| 6 | 11.495753615 | 9.302003166  | -9.467548974  |
| 1 | 12.403377827 | 8.850037171  | -9.043264070  |
| 6 | 11.423791258 | 8.993031916  | -10.973241323 |
| 6 | 11.442851401 | 7.475220342  | -11.185916445 |
| 1 | 12.363808386 | 7.059928326  | -10.756867851 |
| 6 | 11.394958488 | 7.173980822  | -12.684999011 |
| 1 | 12.267842696 | 7.611983067  | -13.178379717 |
| 1 | 11.420411475 | 6.092568918  | -12.849372480 |
| 6 | 10.109691947 | 7.759729695  | -13.272395127 |
| 1 | 10.074349187 | 7.537525201  | -14.346575512 |
| 6 | 10.062717977 | 9.284954244  | -13.078998465 |
| 1 | 10.920643888 | 9.742789480  | -13.588707869 |
| 6 | 8.763236791  | 9.818516422  | -13.696351668 |
| 1 | 8.741041934  | 9.562364728  | -14.760262006 |
| 1 | 8.717292367  | 10.908159491 | -13.622285633 |
| 1 | 6.632627485  | 9.593419707  | -13.416550649 |
| 6 | 7.594340134  | 7.671066101  | -13.189328468 |
| 1 | 6.732344987  | 7.205695030  | -12.701769205 |
| 1 | 7.551732707  | 7.428843892  | -14.255368929 |
| 6 | 8.890557894  | 7.129327655  | -12.583938612 |
| 1 | 8.923878163  | 6.039662324  | -12.712764568 |
| 6 | 8.949138262  | 7.454453064  | -11.083042213 |
| 1 | 8.077978388  | 7.009469325  | -10.582664916 |
| 6 | 10.226917092 | 6.859420417  | -10.482300591 |
| 1 | 10.227232683 | 5.771971353  | -10.626077027 |
| 6 | 10.272457897 | 7.171323461  | -8.988619778  |
| 1 | 9.400895318  | 6.731095462  | -8.483632376  |
| 1 | 11.177148592 | 6.744547794  | -8.535796224  |
| 6 | 10.267418024 | 8.681729823  | -8.808497080  |
| 1 | 10.308781321 | 8.903607071  | -7.709372344  |
| 6 | 8.993686842  | 9.311450019  | -9.369838195  |
| 1 | 8.119597150  | 8.886780398  | -8.852568218  |
| 6 | 9.034912383  | 10.821339133 | -9.136860814  |
| 1 | 9.104009278  | 11.007251910 | -8.046301196  |
| 1 | 8.116072469  | 11.301759529 | -9.479000766  |
| 6 | 7.600477124  | 9.505686385  | -11.492077131 |
| 1 | 6.754252594  | 9.027050662  | -10.988274647 |
| 1 | 7.497920467  | 10.583995556 | -11.351174790 |

---

Orientation **1c** of (*M*)-[123]tetramantane on Cu(111) – rhombus

---

|    |              |             |              |
|----|--------------|-------------|--------------|
| 29 | 0.035290566  | 0.003201823 | -5.534646642 |
| 29 | 2.537325317  | 0.012693545 | -5.596703500 |
| 29 | 5.090517422  | 0.008148182 | -5.597501902 |
| 29 | 7.644182454  | 0.004807887 | -5.600566097 |
| 29 | 10.186051189 | 0.001841009 | -5.595572969 |
| 29 | 12.736578769 | 0.002095728 | -5.591950367 |

|    |              |              |              |
|----|--------------|--------------|--------------|
| 29 | 15.284996964 | 0.001232611  | -5.586395498 |
| 29 | 17.824536197 | 0.003740251  | -5.555002465 |
| 29 | 1.266167011  | 2.206227204  | -5.684527262 |
| 29 | 3.837142456  | 2.216082845  | -5.744935701 |
| 29 | 6.382867024  | 2.215646056  | -5.741932681 |
| 29 | 8.919416440  | 2.214305001  | -5.741744042 |
| 29 | 11.457621346 | 2.213560135  | -5.737283958 |
| 29 | 13.999645028 | 2.210745771  | -5.735857129 |
| 29 | 16.549172372 | 2.213029146  | -5.750245357 |
| 29 | 19.080569016 | 2.177302391  | -5.589201357 |
| 29 | 0.023917460  | 4.402022014  | -5.600955730 |
| 29 | 2.559364925  | 4.423760703  | -5.733810391 |
| 29 | 5.111202173  | 4.423723181  | -5.733699948 |
| 29 | 7.649478013  | 4.420205348  | -5.713990672 |
| 29 | 10.188661573 | 4.415788396  | -5.703490532 |
| 29 | 12.731440483 | 4.417048303  | -5.715873320 |
| 29 | 15.271397613 | 4.416506504  | -5.733246065 |
| 29 | 17.838492030 | 4.412554862  | -5.670832891 |
| 29 | 1.273270030  | 6.622853944  | -5.669187944 |
| 29 | 3.840079595  | 6.627200929  | -5.724781327 |
| 29 | 6.377443984  | 6.621538271  | -5.702706397 |
| 29 | 8.916640747  | 6.619043152  | -5.703399379 |
| 29 | 11.465651353 | 6.613852260  | -5.698559753 |
| 29 | 14.002855263 | 6.618477844  | -5.709660061 |
| 29 | 16.548326890 | 6.620167574  | -5.721920136 |
| 29 | 19.092160393 | 6.601396200  | -5.584178559 |
| 29 | 0.021067808  | 8.820497139  | -5.587225046 |
| 29 | 2.567337725  | 8.827543895  | -5.726761675 |
| 29 | 5.114667083  | 8.822329816  | -5.721089617 |
| 29 | 7.649947829  | 8.823469691  | -5.701928791 |
| 29 | 10.192866049 | 8.822067488  | -5.686406557 |
| 29 | 12.737987891 | 8.819483988  | -5.699516875 |
| 29 | 15.272012152 | 8.818543265  | -5.720818453 |
| 29 | 17.838278806 | 8.814125714  | -5.664712554 |
| 29 | 1.279063084  | 11.026105789 | -5.672024597 |
| 29 | 3.843118292  | 11.025608875 | -5.718166970 |
| 29 | 6.380913041  | 11.022164433 | -5.700048678 |
| 29 | 8.919351916  | 11.024740386 | -5.684744444 |
| 29 | 11.464018123 | 11.020479006 | -5.702289506 |
| 29 | 14.002583915 | 11.017713029 | -5.709257829 |
| 29 | 16.549648088 | 11.020176473 | -5.720616294 |
| 29 | 19.097773806 | 11.016898329 | -5.579435217 |
| 29 | 0.027128120  | 13.233430601 | -5.595628343 |
| 29 | 2.566334090  | 13.223698622 | -5.725110397 |
| 29 | 5.118311747  | 13.218913545 | -5.713475109 |
| 29 | 7.653849925  | 13.220001513 | -5.710438966 |
| 29 | 10.194311149 | 13.220052879 | -5.702730101 |
| 29 | 12.732860385 | 13.215803106 | -5.705181253 |
| 29 | 15.277380512 | 13.212431741 | -5.720703029 |
| 29 | 17.840346385 | 13.214217273 | -5.671284347 |

|    |              |              |              |
|----|--------------|--------------|--------------|
| 29 | 1.282940158  | 15.433744100 | -5.678979641 |
| 29 | 3.846351806  | 15.427684365 | -5.737348722 |
| 29 | 6.389738205  | 15.423071070 | -5.726797282 |
| 29 | 8.925623231  | 15.419794920 | -5.729792850 |
| 29 | 11.465086126 | 15.419359609 | -5.725798184 |
| 29 | 14.005109608 | 15.420879932 | -5.730466032 |
| 29 | 16.552319401 | 15.420096520 | -5.737509218 |
| 29 | 19.091941448 | 15.432730414 | -5.596339590 |
| 29 | 0.034073085  | 17.642557598 | -5.540103748 |
| 29 | 2.559596270  | 17.639433238 | -5.630524430 |
| 29 | 5.110384792  | 17.636844587 | -5.641025747 |
| 29 | 7.653608294  | 17.634382852 | -5.630164064 |
| 29 | 10.196974100 | 17.633046213 | -5.627555716 |
| 29 | 12.742823460 | 17.631820489 | -5.634906378 |
| 29 | 15.286160777 | 17.631488481 | -5.640898848 |
| 29 | 17.838683283 | 17.625763540 | -5.591229393 |
| 29 | 1.269357319  | 0.709288923  | -3.535841353 |
| 29 | 3.840165970  | 0.690867827  | -3.504873001 |
| 29 | 6.383066322  | 0.693976192  | -3.512511267 |
| 29 | 8.918646698  | 0.694981074  | -3.521152424 |
| 29 | 11.455252087 | 0.693863614  | -3.516607028 |
| 29 | 13.994930823 | 0.689889729  | -3.504655741 |
| 29 | 16.537817880 | 0.675463944  | -3.491908378 |
| 29 | 19.082727246 | 0.721056163  | -3.536595914 |
| 29 | -0.015160641 | 2.940078990  | -3.549078689 |
| 29 | 2.561968397  | 2.946214079  | -3.547309269 |
| 29 | 5.097191407  | 2.939966380  | -3.550290005 |
| 29 | 7.640198276  | 2.940069785  | -3.548485223 |
| 29 | 10.185563812 | 2.937680642  | -3.547205884 |
| 29 | 12.732645478 | 2.937150539  | -3.544565817 |
| 29 | 15.284582515 | 2.936931823  | -3.546074793 |
| 29 | 17.875703988 | 2.946085609  | -3.535164977 |
| 29 | 1.240416444  | 5.154379281  | -3.546542067 |
| 29 | 3.822846698  | 5.145525604  | -3.537489907 |
| 29 | 6.370898444  | 5.144305412  | -3.536776459 |
| 29 | 8.918068616  | 5.143542687  | -3.538222033 |
| 29 | 11.465755376 | 5.142912341  | -3.534913078 |
| 29 | 14.007012887 | 5.140362333  | -3.534797664 |
| 29 | 16.549446776 | 5.133965705  | -3.534091527 |
| 29 | 19.125190778 | 5.145756279  | -3.528065551 |
| 29 | -0.012681326 | 7.354479804  | -3.538399004 |
| 29 | 2.560869817  | 7.347017212  | -3.544940724 |
| 29 | 5.100584455  | 7.346804178  | -3.541754976 |
| 29 | 7.643704193  | 7.346018321  | -3.544269373 |
| 29 | 10.189020231 | 7.345209625  | -3.546972494 |
| 29 | 12.737035251 | 7.343749923  | -3.543440867 |
| 29 | 15.287984028 | 7.339802051  | -3.539479175 |
| 29 | 17.866738599 | 7.343638078  | -3.537071797 |
| 29 | 1.245925810  | 9.554778298  | -3.542466897 |
| 29 | 3.823682352  | 9.553110083  | -3.540994406 |

|    |              |              |              |
|----|--------------|--------------|--------------|
| 29 | 6.372471478  | 9.552175929  | -3.541871387 |
| 29 | 8.921285546  | 9.550264086  | -3.544491660 |
| 29 | 11.464991635 | 9.549736050  | -3.544437385 |
| 29 | 14.010766093 | 9.548159210  | -3.536304132 |
| 29 | 16.550814596 | 9.545977165  | -3.539129034 |
| 29 | 19.126053005 | 9.544090609  | -3.536613724 |
| 29 | -0.009762097 | 11.756595666 | -3.548124371 |
| 29 | 2.563781033  | 11.761033621 | -3.540163806 |
| 29 | 5.103417476  | 11.758407574 | -3.537300092 |
| 29 | 7.645885203  | 11.756856351 | -3.538618839 |
| 29 | 10.192253205 | 11.754984985 | -3.544818383 |
| 29 | 12.739665535 | 11.752934102 | -3.541778523 |
| 29 | 15.290408964 | 11.754318612 | -3.536841217 |
| 29 | 17.869461728 | 11.746716092 | -3.536942465 |
| 29 | 1.245896825  | 13.955652362 | -3.537332384 |
| 29 | 3.828581197  | 13.961289808 | -3.543874148 |
| 29 | 6.376682976  | 13.959862723 | -3.544926777 |
| 29 | 8.923378978  | 13.958007793 | -3.541921357 |
| 29 | 11.470931689 | 13.956258938 | -3.543809287 |
| 29 | 14.012608954 | 13.955567652 | -3.541709593 |
| 29 | 16.554743940 | 13.958665904 | -3.543489915 |
| 29 | 19.130464141 | 13.942594340 | -3.544265017 |
| 29 | -0.006710610 | 16.171219006 | -3.537775812 |
| 29 | 2.570589250  | 16.162348650 | -3.535260494 |
| 29 | 5.105319401  | 16.165752540 | -3.533055605 |
| 29 | 7.648637505  | 16.163300396 | -3.531667650 |
| 29 | 10.193841739 | 16.162467081 | -3.530545357 |
| 29 | 12.740826067 | 16.160617703 | -3.533658732 |
| 29 | 15.292726641 | 16.158070890 | -3.532105773 |
| 29 | 17.884032282 | 16.145152052 | -3.536619660 |
| 29 | 1.281174003  | 18.401975458 | -3.548757723 |
| 29 | 3.851530395  | 18.417074880 | -3.576153776 |
| 29 | 6.393741841  | 18.411149576 | -3.567906340 |
| 29 | 8.929983975  | 18.407669596 | -3.558694928 |
| 29 | 11.466655371 | 18.407305026 | -3.563905272 |
| 29 | 14.005353450 | 18.408251753 | -3.573338806 |
| 29 | 16.549143388 | 18.418636331 | -3.581813456 |
| 29 | 19.093368519 | 18.368956652 | -3.533498305 |
| 29 | 0.020085962  | 1.469546038  | -1.542943678 |
| 29 | 2.546580938  | 1.469061178  | -1.448839242 |
| 29 | 5.097108893  | 1.468263086  | -1.437712381 |
| 29 | 7.641441055  | 1.468451038  | -1.448190019 |
| 29 | 10.185424248 | 1.467564799  | -1.448747745 |
| 29 | 12.730988987 | 1.466779849  | -1.439638063 |
| 29 | 15.274184741 | 1.462913363  | -1.432789321 |
| 29 | 17.826967129 | 1.465897804  | -1.477643188 |
| 29 | 1.272008370  | 3.675633312  | -1.402112545 |
| 29 | 3.836399705  | 3.679774462  | -1.339635180 |
| 29 | 6.379556096  | 3.680225723  | -1.353148082 |
| 29 | 8.916704745  | 3.682415880  | -1.349269993 |

|    |              |              |              |
|----|--------------|--------------|--------------|
| 29 | 11.455740138 | 3.680036103  | -1.350609638 |
| 29 | 13.996038445 | 3.675879623  | -1.343090860 |
| 29 | 16.543320779 | 3.672393027  | -1.333898612 |
| 29 | 19.083293466 | 3.656512776  | -1.472021907 |
| 29 | 0.018775094  | 5.878332651  | -1.486630604 |
| 29 | 2.559011330  | 5.883939173  | -1.353396757 |
| 29 | 5.111133159  | 5.885906518  | -1.365139068 |
| 29 | 7.648024829  | 5.884849760  | -1.368912804 |
| 29 | 10.187299674 | 5.885197583  | -1.369780899 |
| 29 | 12.725280990 | 5.882757649  | -1.370178681 |
| 29 | 15.270976544 | 5.880956437  | -1.354112142 |
| 29 | 17.834850041 | 5.876522398  | -1.400050014 |
| 29 | 1.273321691  | 8.083589969  | -1.410022444 |
| 29 | 3.838185105  | 8.081094422  | -1.361623898 |
| 29 | 6.380099612  | 8.082003315  | -1.376039540 |
| 29 | 8.920049763  | 8.080875793  | -1.380407404 |
| 29 | 11.458026242 | 8.080212876  | -1.379739956 |
| 29 | 13.997742083 | 8.077984090  | -1.368547316 |
| 29 | 16.546669104 | 8.071948405  | -1.352168771 |
| 29 | 19.094466373 | 8.071522710  | -1.489453825 |
| 29 | 0.018536998  | 10.291391184 | -1.496095976 |
| 29 | 2.564893641  | 10.280912684 | -1.352803049 |
| 29 | 5.112878107  | 10.282391537 | -1.361781479 |
| 29 | 7.651765102  | 10.277814099 | -1.376316471 |
| 29 | 10.190004873 | 10.278103844 | -1.384193953 |
| 29 | 12.730452131 | 10.277880701 | -1.368846061 |
| 29 | 15.271270258 | 10.275217160 | -1.357288752 |
| 29 | 17.837955049 | 10.276069691 | -1.407172295 |
| 29 | 1.274152820  | 12.487324256 | -1.411233428 |
| 29 | 3.840509693  | 12.479995933 | -1.356151771 |
| 29 | 6.381740529  | 12.481782989 | -1.373207382 |
| 29 | 8.922410939  | 12.480001869 | -1.377298553 |
| 29 | 11.462816932 | 12.479083308 | -1.376723986 |
| 29 | 14.001634846 | 12.477007540 | -1.364819754 |
| 29 | 16.550576201 | 12.472348557 | -1.352176864 |
| 29 | 19.094228860 | 12.487576394 | -1.485301031 |
| 29 | 0.027850430  | 14.710666961 | -1.481675385 |
| 29 | 2.563109779  | 14.685547435 | -1.343515531 |
| 29 | 5.114689182  | 14.682981860 | -1.348133365 |
| 29 | 7.654410609  | 14.682257024 | -1.362921479 |
| 29 | 10.193275119 | 14.680259152 | -1.364759214 |
| 29 | 12.733999077 | 14.679324609 | -1.356207057 |
| 29 | 15.276197122 | 14.679177412 | -1.344177809 |
| 29 | 17.843049522 | 14.678985146 | -1.400482022 |
| 29 | 1.272932640  | 16.904720218 | -1.397022287 |
| 29 | 3.843961612  | 16.892634289 | -1.333326210 |
| 29 | 6.389555479  | 16.890912931 | -1.338136506 |
| 29 | 8.926492487  | 16.889544195 | -1.338051606 |
| 29 | 11.464755852 | 16.887434273 | -1.340632278 |
| 29 | 14.006895635 | 16.887531890 | -1.341139948 |



|    |              |              |               |
|----|--------------|--------------|---------------|
| 29 | 16.555799341 | 16.881102065 | -1.320208539  |
| 29 | 19.087523591 | 16.913235031 | -1.478446590  |
| 29 | 0.044611992  | 19.110562900 | -1.551309758  |
| 29 | 2.547493802  | 19.097908172 | -1.483690019  |
| 29 | 5.099837326  | 19.098856854 | -1.477726839  |
| 29 | 7.653899066  | 19.100965098 | -1.476642940  |
| 29 | 10.196230006 | 19.101641654 | -1.482478805  |
| 29 | 12.746466558 | 19.099170584 | -1.487534310  |
| 29 | 15.295229408 | 19.095682255 | -1.486472626  |
| 29 | 17.834480089 | 19.088684387 | -1.512393003  |
| 6  | 8.656246049  | 11.001516916 | -9.217931934  |
| 1  | 12.327418559 | 8.555762042  | -11.519269741 |
| 6  | 9.070994208  | 8.797906034  | -10.366494798 |
| 6  | 10.594604387 | 9.035201149  | -10.314707970 |
| 6  | 11.213440675 | 8.358670032  | -9.080993521  |
| 1  | 10.801640426 | 8.780387805  | -8.151767453  |
| 1  | 12.294154467 | 8.535816167  | -9.063653525  |
| 6  | 10.928766591 | 6.858505811  | -9.094351666  |
| 1  | 11.352238708 | 6.408469034  | -8.172735066  |
| 6  | 11.577770494 | 6.222157739  | -10.319223507 |
| 1  | 11.392047633 | 5.144370236  | -10.327694622 |
| 1  | 12.659597007 | 6.382285456  | -10.299190084 |
| 6  | 10.970961408 | 6.874026121  | -11.564449016 |
| 1  | 11.429409914 | 6.433013599  | -12.458717161 |
| 6  | 11.242858221 | 8.385436138  | -11.558753435 |
| 6  | 10.682829507 | 9.013664476  | -12.839917547 |
| 1  | 11.162814962 | 8.546051519  | -13.708942923 |
| 6  | 10.976788668 | 10.514430876 | -12.845040219 |
| 1  | 12.057624091 | 10.681964153 | -12.811678389 |
| 1  | 10.592281404 | 10.968924804 | -13.762958113 |
| 6  | 10.309866133 | 11.160053886 | -11.629712037 |
| 1  | 10.516048034 | 12.237982647 | -11.634698236 |
| 6  | 10.857685494 | 10.555753205 | -10.324312777 |
| 1  | 11.938573104 | 10.736877237 | -10.262645870 |
| 6  | 10.162203038 | 11.252058761 | -9.152263382  |
| 1  | 10.362178168 | 12.327469814 | -9.190594701  |
| 1  | 10.562378763 | 10.886504654 | -8.193506394  |
| 1  | 8.172740291  | 11.472163569 | -8.342134364  |
| 6  | 8.102681692  | 11.611568628 | -10.503739446 |
| 1  | 7.021195264  | 11.457319277 | -10.558944080 |
| 1  | 8.294906040  | 12.688113610 | -10.524358944 |
| 6  | 8.792763774  | 10.930278640 | -11.688535661 |
| 1  | 8.399755241  | 11.351375072 | -12.622737753 |
| 6  | 8.518540073  | 9.418736308  | -11.670306639 |
| 1  | 7.433765314  | 9.249633437  | -11.708241940 |
| 6  | 9.170614504  | 8.761538024  | -12.891876296 |
| 1  | 8.755928203  | 9.207649741  | -13.804684577 |
| 6  | 8.876705111  | 7.260625293  | -12.883246814 |
| 1  | 7.796221603  | 7.092746104  | -12.924422408 |
| 1  | 9.326516397  | 6.784983801  | -13.759870916 |

|   |             |             |               |
|---|-------------|-------------|---------------|
| 6 | 9.453367477 | 6.643365867 | -11.608253706 |
| 1 | 9.247975064 | 5.565238127 | -11.603970350 |
| 6 | 8.812179980 | 7.276033587 | -10.359465756 |
| 1 | 7.730180684 | 7.092037749 | -10.371312905 |
| 6 | 9.423943102 | 6.603070550 | -9.127261267  |
| 1 | 9.228427057 | 5.526821014 | -9.160891243  |
| 1 | 8.961051086 | 6.984738678 | -8.202436757  |
| 6 | 8.357284882 | 9.502073032 | -9.200289232  |
| 1 | 7.277692729 | 9.337944569 | -9.279865321  |
| 1 | 8.673738599 | 9.091503888 | -8.231328563  |

---

Orientation **a** of (*P*)-[123]tetramantane on Cu(111) – Olympic rings

---

|    |              |             |              |
|----|--------------|-------------|--------------|
| 29 | 0.135939066  | 0.196461347 | -5.400843710 |
| 29 | 2.605969804  | 0.186810134 | -5.456139965 |
| 29 | 5.150134919  | 0.181828974 | -5.442700803 |
| 29 | 7.706102320  | 0.169529497 | -5.430453298 |
| 29 | 10.242273491 | 0.160306687 | -5.406908436 |
| 29 | 12.791227259 | 0.157150543 | -5.377590383 |
| 29 | 15.335563210 | 0.152010339 | -5.350569700 |
| 29 | 17.849938845 | 0.150468132 | -5.301909986 |
| 29 | 1.320015055  | 2.362494349 | -5.583736739 |
| 29 | 3.910570796  | 2.379063182 | -5.686192750 |
| 29 | 6.458931892  | 2.370534891 | -5.668483392 |
| 29 | 8.988039605  | 2.362243007 | -5.652414212 |
| 29 | 11.517435379 | 2.356914784 | -5.623266364 |
| 29 | 14.057088894 | 2.351272596 | -5.600001633 |
| 29 | 16.605656313 | 2.352748949 | -5.608313290 |
| 29 | 19.107860303 | 2.289211670 | -5.328920687 |
| 29 | 0.127698938  | 4.558742313 | -5.461264717 |
| 29 | 2.637123622  | 4.589273776 | -5.654414118 |
| 29 | 5.191108258  | 4.585125783 | -5.641425671 |
| 29 | 7.725189889  | 4.574630866 | -5.589918286 |
| 29 | 10.256457368 | 4.567856740 | -5.571363817 |
| 29 | 12.793343828 | 4.562738343 | -5.561808739 |
| 29 | 15.331779243 | 4.556097042 | -5.562917401 |
| 29 | 17.914403694 | 4.540952264 | -5.406883450 |
| 29 | 1.340195679  | 6.785358152 | -5.512315832 |
| 29 | 3.924118258  | 6.792302006 | -5.613266622 |
| 29 | 6.453523832  | 6.769299797 | -5.537404369 |
| 29 | 8.998526949  | 6.758084168 | -5.516727615 |
| 29 | 11.533999057 | 6.753735663 | -5.505704667 |
| 29 | 14.068277855 | 6.756190597 | -5.505746980 |
| 29 | 16.612902685 | 6.758461796 | -5.506892745 |
| 29 | 19.130508071 | 6.720693861 | -5.261682520 |
| 29 | 0.133595490  | 8.976076467 | -5.390629610 |
| 29 | 2.655646592  | 8.990149578 | -5.603669180 |
| 29 | 5.193421351  | 8.976321231 | -5.553219114 |
| 29 | 7.727904791  | 8.969360323 | -5.528414952 |
| 29 | 10.271341108 | 8.957136316 | -5.506310878 |
| 29 | 12.812454537 | 8.954262835 | -5.512147369 |

---

|    |              |              |              |
|----|--------------|--------------|--------------|
| 29 | 15.343094295 | 8.953179441  | -5.484528512 |
| 29 | 17.921054368 | 8.939333755  | -5.353789249 |
| 29 | 1.357169970  | 11.181429264 | -5.469693291 |
| 29 | 3.936901593  | 11.179733832 | -5.556973555 |
| 29 | 6.460123410  | 11.173267398 | -5.475016844 |
| 29 | 9.005401935  | 11.170384934 | -5.492312452 |
| 29 | 11.545598143 | 11.159303489 | -5.462375041 |
| 29 | 14.082702464 | 11.151334270 | -5.432803482 |
| 29 | 16.624217680 | 11.147746125 | -5.455640969 |
| 29 | 19.145421067 | 11.131556044 | -5.207274125 |
| 29 | 0.149569799  | 13.382756060 | -5.352454746 |
| 29 | 2.664009890  | 13.374192867 | -5.552036951 |
| 29 | 5.219375307  | 13.361414366 | -5.512095670 |
| 29 | 7.743096278  | 13.365164386 | -5.472408604 |
| 29 | 10.278526153 | 13.360515921 | -5.441295398 |
| 29 | 12.811553976 | 13.347125050 | -5.424412928 |
| 29 | 15.353247323 | 13.333478733 | -5.440897044 |
| 29 | 17.929244117 | 13.329466104 | -5.316889237 |
| 29 | 1.370302083  | 15.586571563 | -5.415320064 |
| 29 | 3.949503472  | 15.574274023 | -5.531502881 |
| 29 | 6.491958101  | 15.564584122 | -5.494870416 |
| 29 | 9.020439286  | 15.554345408 | -5.487136300 |
| 29 | 11.550336870 | 15.548646612 | -5.458053622 |
| 29 | 14.085000077 | 15.545618577 | -5.441108084 |
| 29 | 16.632403270 | 15.539703273 | -5.425079131 |
| 29 | 19.144759494 | 15.540948109 | -5.179472661 |
| 29 | 0.166418746  | 17.775127206 | -5.206158483 |
| 29 | 2.664390368  | 17.785812492 | -5.306617682 |
| 29 | 5.212345039  | 17.776188652 | -5.305172730 |
| 29 | 7.752527632  | 17.763783207 | -5.268348138 |
| 29 | 10.288883564 | 17.755550631 | -5.243772965 |
| 29 | 12.830168219 | 17.750982987 | -5.235139541 |
| 29 | 15.369532908 | 17.748437963 | -5.220981924 |
| 29 | 17.916990636 | 17.727726171 | -5.130504159 |
| 29 | 1.321295501  | 0.809736701  | -3.382920694 |
| 29 | 3.901085927  | 0.768357121  | -3.323562033 |
| 29 | 6.440916612  | 0.768648298  | -3.318538975 |
| 29 | 8.966862683  | 0.766292652  | -3.312939208 |
| 29 | 11.492540169 | 0.759677349  | -3.286672273 |
| 29 | 14.025053999 | 0.749506576  | -3.248320630 |
| 29 | 16.561537893 | 0.713331558  | -3.210433227 |
| 29 | 19.095892772 | 0.818820104  | -3.274666993 |
| 29 | 0.025118159  | 3.062518407  | -3.428778749 |
| 29 | 2.630857079  | 3.086919424  | -3.395979913 |
| 29 | 5.152711738  | 3.064484906  | -3.382051169 |
| 29 | 7.689184336  | 3.060401057  | -3.362761639 |
| 29 | 10.229073697 | 3.053606164  | -3.345993275 |
| 29 | 12.773952466 | 3.046954575  | -3.319431706 |
| 29 | 15.333000615 | 3.040351932  | -3.301660298 |
| 29 | 17.969579883 | 3.056838823  | -3.259171755 |

---

|    |              |              |              |
|----|--------------|--------------|--------------|
| 29 | 1.256056070  | 5.291586858  | -3.367856597 |
| 29 | 3.877204038  | 5.277377116  | -3.326656342 |
| 29 | 6.428027752  | 5.268353253  | -3.297436058 |
| 29 | 8.973550096  | 5.263321644  | -3.276350736 |
| 29 | 11.517572340 | 5.257853724  | -3.260064181 |
| 29 | 14.053392187 | 5.248512685  | -3.243359762 |
| 29 | 16.592378305 | 5.233900691  | -3.231501254 |
| 29 | 19.197147543 | 5.254068683  | -3.192823651 |
| 29 | 0.028220407  | 7.494251134  | -3.335247819 |
| 29 | 2.628311145  | 7.476563522  | -3.327012915 |
| 29 | 5.161983167  | 7.471434468  | -3.294636149 |
| 29 | 7.701574783  | 7.465953637  | -3.286538977 |
| 29 | 10.241696715 | 7.460381654  | -3.263186095 |
| 29 | 12.789602319 | 7.453723474  | -3.245868362 |
| 29 | 15.345519495 | 7.439799836  | -3.220860439 |
| 29 | 17.956128615 | 7.442750717  | -3.199193317 |
| 29 | 1.274374167  | 9.685799858  | -3.308757247 |
| 29 | 3.883600894  | 9.679104277  | -3.275966260 |
| 29 | 6.438129483  | 9.671064156  | -3.266952952 |
| 29 | 8.987746210  | 9.665962043  | -3.276721705 |
| 29 | 11.525122794 | 9.658688654  | -3.250634115 |
| 29 | 14.065848190 | 9.651042500  | -3.201571557 |
| 29 | 16.600904205 | 9.644443781  | -3.179488887 |
| 29 | 19.205252894 | 9.636663990  | -3.163004922 |
| 29 | 0.040239753  | 11.883618596 | -3.306020762 |
| 29 | 2.639987698  | 11.887353287 | -3.268871795 |
| 29 | 5.172816171  | 11.879159662 | -3.230017553 |
| 29 | 7.713332482  | 11.871212867 | -3.231520163 |
| 29 | 10.252757602 | 11.863985406 | -3.224342630 |
| 29 | 12.801094508 | 11.856168918 | -3.187241852 |
| 29 | 15.357595644 | 11.856218003 | -3.152324951 |
| 29 | 17.968125701 | 11.838071444 | -3.145625349 |
| 29 | 1.279045146  | 14.080154539 | -3.249853363 |
| 29 | 3.900541379  | 14.079872654 | -3.243708881 |
| 29 | 6.450475326  | 14.074153156 | -3.213561907 |
| 29 | 8.996662367  | 14.066619288 | -3.186133213 |
| 29 | 11.541396747 | 14.058749132 | -3.167582721 |
| 29 | 14.077675260 | 14.053825299 | -3.147092815 |
| 29 | 16.616094269 | 14.055559719 | -3.137749076 |
| 29 | 19.220750087 | 14.019365340 | -3.131243162 |
| 29 | 0.060426577  | 16.316077482 | -3.207260716 |
| 29 | 2.665560910  | 16.277115147 | -3.199133530 |
| 29 | 5.187092805  | 16.286103790 | -3.170992695 |
| 29 | 7.723673931  | 16.275626680 | -3.147986311 |
| 29 | 10.263500829 | 16.269511931 | -3.124258820 |
| 29 | 12.808629162 | 16.262844698 | -3.110650371 |
| 29 | 15.367646840 | 16.255842075 | -3.087041473 |
| 29 | 18.004487184 | 16.225071505 | -3.084431458 |
| 29 | 1.369235983  | 18.563126012 | -3.227480098 |
| 29 | 3.949594430  | 18.590252243 | -3.246084190 |

---

|    |              |              |              |
|----|--------------|--------------|--------------|
| 29 | 6.489044953  | 18.576641907 | -3.212154970 |
| 29 | 9.014310489  | 18.565347812 | -3.177171508 |
| 29 | 11.540601879 | 18.559014452 | -3.162834622 |
| 29 | 14.073054504 | 18.555665132 | -3.159620572 |
| 29 | 16.609719586 | 18.578770495 | -3.157047467 |
| 29 | 19.142073281 | 18.457873846 | -3.051961252 |
| 29 | 0.088592992  | 1.604972759  | -1.424399308 |
| 29 | 2.585491543  | 1.578566360  | -1.283490078 |
| 29 | 5.133318486  | 1.573632198  | -1.245604993 |
| 29 | 7.674527658  | 1.572949290  | -1.241768362 |
| 29 | 10.211595615 | 1.567512066  | -1.226032009 |
| 29 | 12.752825629 | 1.558974517  | -1.192996373 |
| 29 | 15.292074773 | 1.547769108  | -1.165001748 |
| 29 | 17.840047991 | 1.554907119  | -1.213113949 |
| 29 | 1.300451277  | 3.783942725  | -1.200323069 |
| 29 | 3.877953877  | 3.781770902  | -1.044863209 |
| 29 | 6.422887864  | 3.778791209  | -1.037114597 |
| 29 | 8.951376852  | 3.777433458  | -1.005870512 |
| 29 | 11.481066519 | 3.768832930  | -0.996287517 |
| 29 | 14.016775681 | 3.757470482  | -0.971094062 |
| 29 | 16.563879368 | 3.748273716  | -0.941470425 |
| 29 | 19.079804340 | 3.733442399  | -1.144586666 |
| 29 | 0.092444439  | 5.994690707  | -1.285934125 |
| 29 | 2.603213758  | 5.989657495  | -1.045309034 |
| 29 | 5.162891170  | 5.990462545  | -1.040512160 |
| 29 | 7.691809842  | 5.985996604  | -1.019018057 |
| 29 | 10.219218117 | 5.982419568  | -1.005977362 |
| 29 | 12.750931929 | 5.972082017  | -0.989107633 |
| 29 | 15.295786154 | 5.962935294  | -0.949092075 |
| 29 | 17.874846949 | 5.951870559  | -1.029919559 |
| 29 | 1.310140807  | 8.190170471  | -1.147344673 |
| 29 | 3.892330819  | 8.178752694  | -1.017030909 |
| 29 | 6.433269403  | 8.178870233  | -1.017956659 |
| 29 | 8.965649906  | 8.172908319  | -1.010309969 |
| 29 | 11.491566778 | 8.167848613  | -0.993031760 |
| 29 | 14.025554435 | 8.156657514  | -0.954674375 |
| 29 | 16.578263630 | 8.141670455  | -0.910181785 |
| 29 | 19.105086595 | 8.143466213  | -1.119563913 |
| 29 | 0.101117538  | 10.402304533 | -1.246145821 |
| 29 | 2.620278204  | 10.374629001 | -0.989336059 |
| 29 | 5.173676320  | 10.371423219 | -0.980616117 |
| 29 | 7.706962962  | 10.360089065 | -0.987689345 |
| 29 | 10.232160021 | 10.357353425 | -0.994121502 |
| 29 | 12.765733834 | 10.351829590 | -0.936569712 |
| 29 | 15.302195399 | 10.341731384 | -0.896796292 |
| 29 | 17.888952300 | 10.342347702 | -0.990063861 |
| 29 | 1.317189540  | 12.586384775 | -1.105241888 |
| 29 | 3.901156006  | 12.564759812 | -0.960866301 |
| 29 | 6.442670883  | 12.562220462 | -0.962956107 |
| 29 | 8.977501565  | 12.553436421 | -0.954640157 |

---

|    |              |              |               |
|----|--------------|--------------|---------------|
| 29 | 11.506513713 | 12.548664363 | -0.929892481  |
| 29 | 14.038889150 | 12.540522788 | -0.887160232  |
| 29 | 16.590903780 | 12.530597444 | -0.857769865  |
| 29 | 19.111994075 | 12.555071462 | -1.062908864  |
| 29 | 0.118944806  | 14.820270754 | -1.174144378  |
| 29 | 2.623943218  | 14.777116004 | -0.943073384  |
| 29 | 5.180124333  | 14.765863907 | -0.913609510  |
| 29 | 7.716196728  | 14.759300161 | -0.912642989  |
| 29 | 10.245044369 | 14.751302908 | -0.896817265  |
| 29 | 12.780576752 | 14.745738758 | -0.861268343  |
| 29 | 15.321072845 | 14.741450171 | -0.829134955  |
| 29 | 17.906062842 | 14.742031543 | -0.940335386  |
| 29 | 1.322448842  | 17.010246154 | -1.030253609  |
| 29 | 3.910473290  | 16.980960328 | -0.889662216  |
| 29 | 6.459431289  | 16.976318514 | -0.866945822  |
| 29 | 8.988454745  | 16.970977952 | -0.842581883  |
| 29 | 11.518290176 | 16.962402293 | -0.829203160  |
| 29 | 14.057912317 | 16.955001376 | -0.811602847  |
| 29 | 16.605282443 | 16.938883192 | -0.759989427  |
| 29 | 19.112295771 | 16.988107199 | -0.996776362  |
| 29 | 0.154266299  | 19.183308268 | -1.227987665  |
| 29 | 2.622936946  | 19.180228368 | -1.133923131  |
| 29 | 5.166828410  | 19.171644429 | -1.107693627  |
| 29 | 7.722399297  | 19.170732180 | -1.080499241  |
| 29 | 10.258836166 | 19.167299339 | -1.064984334  |
| 29 | 12.808002325 | 19.155998297 | -1.051011857  |
| 29 | 15.352182629 | 19.146793438 | -1.035740939  |
| 29 | 17.866345315 | 19.135976735 | -1.046651573  |
| 6  | 9.967613566  | 10.654281555 | -10.910381355 |
| 6  | 9.826874865  | 12.118154756 | -11.367826235 |
| 1  | 10.706719667 | 12.704665220 | -11.095268317 |
| 1  | 9.742729070  | 12.142231940 | -12.458736251 |
| 6  | 8.582311356  | 12.760278533 | -10.744752743 |
| 1  | 8.520033518  | 13.807991377 | -11.061097061 |
| 6  | 7.334600851  | 12.006239085 | -11.206929393 |
| 1  | 7.245831542  | 12.056591950 | -12.295852728 |
| 1  | 6.437469870  | 12.457339853 | -10.772825430 |
| 6  | 7.449839353  | 10.547182002 | -10.763749571 |
| 1  | 6.561991076  | 9.993376571  | -11.093706206 |
| 6  | 8.703354673  | 9.894576770  | -11.365446655 |
| 1  | 8.639492558  | 9.947956630  | -12.460202590 |
| 6  | 8.779274452  | 8.422076121  | -10.946428147 |
| 1  | 7.878449651  | 7.898639862  | -11.289616258 |
| 6  | 8.852063779  | 8.352063465  | -9.413203236  |
| 1  | 8.906282297  | 7.304787791  | -9.089037971  |
| 6  | 7.618325638  | 9.009074046  | -8.811067708  |
| 1  | 6.709459135  | 8.478165567  | -9.105500699  |
| 1  | 7.686919784  | 8.954821153  | -7.704453719  |
| 6  | 7.548671408  | 10.470163526 | -9.231508539  |
| 1  | 6.663383209  | 10.936716482 | -8.777855275  |

---

|   |              |              |               |
|---|--------------|--------------|---------------|
| 6 | 8.799198588  | 11.235756346 | -8.790428971  |
| 1 | 8.865299077  | 11.195570480 | -7.675217378  |
| 6 | 8.671042129  | 12.697672832 | -9.216286880  |
| 1 | 7.765771479  | 13.124768380 | -8.770363307  |
| 1 | 9.520468753  | 13.284507614 | -8.855773943  |
| 6 | 10.057838658 | 10.572495896 | -9.363962228  |
| 6 | 11.342747831 | 11.246590381 | -8.869007413  |
| 1 | 11.383199225 | 11.145732591 | -7.765957382  |
| 1 | 11.354061817 | 12.315570215 | -9.086939996  |
| 6 | 12.578767182 | 10.581792017 | -9.470125302  |
| 1 | 13.477780423 | 11.096536448 | -9.109913509  |
| 6 | 12.510030267 | 10.668442836 | -10.999969255 |
| 1 | 13.379421428 | 10.165566811 | -11.433425400 |
| 1 | 12.542575084 | 11.713464443 | -11.316971932 |
| 6 | 11.228948381 | 9.985818010  | -11.494920782 |
| 1 | 11.189098319 | 10.051852433 | -12.589667224 |
| 6 | 11.267489374 | 8.505314746  | -11.080516337 |
| 1 | 12.155725282 | 8.033529687  | -11.518494407 |
| 6 | 10.016780588 | 7.768957044  | -11.561217878 |
| 1 | 10.069463933 | 6.716306315  | -11.268073896 |
| 1 | 9.954235570  | 7.813490820  | -12.652314690 |
| 6 | 10.111584918 | 9.089611222  | -8.961893341  |
| 1 | 10.171387567 | 9.033576233  | -7.848887088  |
| 6 | 11.356475861 | 8.418547591  | -9.546661464  |
| 1 | 11.375549978 | 7.365065358  | -9.238754779  |
| 6 | 12.622566356 | 9.113850829  | -9.057503711  |
| 1 | 13.510973217 | 8.622997504  | -9.463088249  |
| 1 | 12.678582184 | 9.040040481  | -7.955173653  |

---
